# Supplementary material for: An Expanded Genome-Wide Association Study of Type 2 Diabetes in Europeans
Source: Oxford University Press journal article supplement (doi:10.2337/db16-1253), 2017-05-31
Supplement: db161253supplementarydata2.xlsx [file db161253supplementarydata2.xlsx]

## Sheet: ST1
Supplementary Table 1. Study design, sample size, and data quality control, phenotype descriptive statistics, genotyping methods, quality control of SNPs, imputation, and statistical analysis for the GWAS study cohorts contributing to stage 1.
Study design								Descriptives					Genotyping						Imputation software	Association analyses			T2D information
Study name		Study design	Ethnicity	Total sample size (N)	Sample QC		References		N [males / females]	Age	BMI	FPG*	Platform	Genotype calling algorithm	Inclusion criteria			QC+ SNPs (N)		SNPs in meta-analysis (N)	Analysis software	Association analysis covariates (if any)	Age at diagnosis	T2D diagnosis criteria and control selection principles
Short form	Full form				Call rate	Other exclusions				[Mean (sd)], years	[Mean (sd)], kg/m2	[Mean (sd)], mmol/l			MAF	Call rate	HWE P						[Mean (sd) males / Mean (sd) females], years
ARIC	The Atherosclerosis Risk in Communities	population-based	White European	7764	≥95%	1) ethnic outliers 2) related individuals and duplicates 3) missing body weight and height	The Atherosclerosis Risk in Communities (ARIC) Study: design and objectives. The ARIC investigators. Am J Epidemiol 1989;129:687-702.	cases	408/347	56.1 (5.6)	30.4 (5.5)	6.0 (0.4)	Affymetrix 6.0	Birdseed	≥1%	≥95%	>10-5	695783	IMPUTE2	18783821	SNPTEST	Age, Sex, Study Centre, 1 PC	NA	Cases: Self-reported diagnosis of diabetes by a physician, self-reported use of medication to treat diabetes, fasting glucose ≥ 7.0 mmol/l, or non-fasting glucose ≥ 11.1 mmol/l. Controls: no self-reported use of medication to treat diabetes and fasting or non-fasting glucose < 7.0 mmol/l.
								controls	3,098/3,911	54.0 (5.7)	26.4 (4.5)	10.5 (4.1)
BioMe^ (Affy)	MT. SINAI BioMe Biobank Platform	population-based	White European	587	≥95%	1) ethnic outliers 2) related individuals and duplicates	Gottesman O, et al. The Electronic Medical Records and Genomics (eMERGE) Network: past, present and future. Genet Med 2013; 15:761-771.	cases	97/35	66.03 (10.71)	31.34 (6.26)	NA	Affymetrix 6.0	Birdseed	≥1%	≥95%	>10-4	683891	IMPUTE	11579618	SNPtest	Age, Sex, 5 PCs	NA	T2D defined as FG >= 7mmol/L or on drug treatment or HbA1c >=6.5%
								controls	297/158	59.40 (15.95)	26.48 (5.24)	5.1 (1.1)**
BioMe^ (Illumina)	MT. SINAI BioMe Biobank Platform	population-based	White European	1902	≥98%	1) ethnic outliers 2) related individuals and duplicates	Gottesman O, et al. The Electronic Medical Records and Genomics (eMERGE) Network: past, present and future. Genet Med 2013; 15:761-771.	cases	181/74	69.11 (9.04)	30.71 (6.18)	NA	Illumina OMNI-ExpressExome	GenomeStudio	≥1%	≥95%	>5x10-5	845969	IMPUTE	11579618	SNPtest	Age, Sex, 4 PCs	NA	T2D defined as FG >= 7mmol/L or on drug treatment or HbA1c >=6.5%
								controls	801/846	67.63 (9.37)	26.26 (5.04)	5.1 (1.0)**
deCODE	deCODE genetics	population-based	White European	90298	>97%	1) ethnic outliers	Steinthorsdottir V, et al. Identification of low-frequency and rare sequence variants associated with elevated or reduced risk of type 2 diabetes. Nat Genet. 2014;46:294-8.	cases	3,982/3,357	63.4 (15.3)	30.7 (6.0)	NA	Illumina HumanHap and Omni series	GenomeStudio	>1%	>95%	>10-6	699107	In-house software	13888396	SNPTEST	Age, Sex	NA	T2D diagnosis is based on diagnostic fasting glucose or HbA1c levels, hospital discharge diagnosis, use of oral diabetes medication or self report. Controls are individuals in the deCODE database with no information indicative of T2D.
								controls	35,946/ 47,103	51.5 (18.7)	26.5 (4.9)	NA
DGDG	Diabetes Gene Discovery Group	Case-control	White European	1376	≥95%	duplicates	Sladek R, et al. A genome-wide association study identifies novel risk loci for type 2 diabetes. Nature 2007;445;881-885.	cases	413/266	59,49 (10,09)	25,87 (2,76)	NA	Illumina HumanHap 300	GenomeStudio	≥1%	≥95%	>10-4	309768	IMPUTE2	14795760	Snptest	Age, Sex, BMI, 2 PCs	44.67 (8.14) / 45.95 (8.65)	T2D was diagnosed in hospital using medical history of hba1c and fasting glucose
								controls	281/416	53,5 (5,65)	23,23 (1,78)	5.08 (0.36)
DGI	Diabetes Genetics Initiative	T2D Case-Control	White European	2097	≥95%	Sequenom fingerprint profile check, gender check, cryptic first degree relatives	Diabetes Genetics Initiative of Broad Institute of Harvard and MIT, Lund University, and Novartis Institutes of BioMedical Research , et al. Genome-Wide Association Analysis Identifies Loci for Type 2 Diabetes and Triglyceride Levels. Science, 316,1331-1336, 2007	cases	530/493	65.29 (9.89)	28.14 (4.09)	NA	Affymetrix GeneChip® Human Mapping 500K Array Set	BRLMM	≥1%	≥95%	>10-6	389878	IMPUTE2	11887445	SNPtest	Age	NA	Patients with T2D were classified according to WHO (1999) criteria with fasting plasma glucose ≥ 7.0 mmol/l or a 2 hr glucose ≥ 11.1 mmol/l during an oral glucose tolerance test (OGTT). To avoid admixture with type 1 diabetes, patients had an age at onset > 35 years and no detectable glutamic acid decarboxylase antibodies (GAD Ab). Members from families with carriers of mutations causing maturity…
								controls	541/533	58.26 (9.56)	26.74 (3.68)	5.25 (0.55)
EGCUT-370	Estonian Genome Center, University of Tartu	population-based	White European	1848	≥95%	1) Related individuals ad duplicates 2) sex mismatch 3) phenotype missing	Leitsalu L, et al. (2014). Cohort profile: Estonian Biobank of the Estonian genome Center, University of Tartu. Int J Epidemiol. 2015;44(4):1137-47.	cases	41/39	61.94 (11.32)	31.57 (4.81)	NA	Illumina 370K	GenomeStudio	>=1%	≥98%	>10-6	309751	IMPUTEv2	13681846	SNPTEST	Age, Sex	NA	T2D diagnosis are based on the GPs performed standardized health examination of the participants with questionnaire on health-related topics such as lifestyle, diet and clinical diagnoses described in WHO ICD-10. The data are continuously updated through periodical linking to national electronic databases and registries. Genotyped controls are random subset of Estonian population.
								controls	866/902	39.71 (16.07)	25.68 (5.10)	NA
EGCUT-OMNI	Estonian Genome Center, University of Tartu	population-based	White European	6402	≥95%	1) Related individuals ad duplicates 2) sex mismatch 3) phenotype missing	Leitsalu L, et al. (2014). Cohort profile: Estonian Biobank of the Estonian genome Center, University of Tartu. Int J Epidemiol. 2015;44(4):1137-47.	cases	161/228	70.22 (11.76)	31.13 (6.19)	NA	Illumina Omni-Express	GenomeStudio	>=1%	≥98%	>10-6	626806	IMPUTEv2	15193807	SNPTEST	Age, Sex	NA	T2D diagnosis are based on the GPs performed standardized health examination of the participants with questionnaire on health-related topics such as lifestyle, diet and clinical diagnoses described in WHO ICD-10. The data are continuously updated through periodical linking to national electronic databases and registries. Genotyped controls are random subset of Estonian population.
								controls	2,754/3,259	50.94 (20.44)	26.48 (5.10)	NA
EPIC-InterAct	EPIC-InterAct	case-control nested into population-based	White European	9292	>=98%	Related individuals and ethnic outliers	InterAct Consortium, et al. Design and cohort description of the InterAct Project: an examination of the interaction of genetic and lifestyle factors on the incidence of type 2 diabetes in the EPIC Study. Diabetologia. 2011;54(9):2272-82.	cases	2,229/2,395	NA	29.95 (4.76)	NA	Illumina 660K	GenomeStudio	>=1%	>=95% (>=99% if MAF<5%)	>5x10-7	541471	IMPUTEv2	19565257	SNPTEST	Sex, 10 PCs	NA	All individuals in InterAct were free of known diabetes at baseline. Ascertainment of incident T2D involved a review of existing EPIC datasets at each centre using multiple sources of evidence including self-report (self reported history of T2D, doctor diagnosed T2D, diabetes drug use), linkage to primary care registers, secondary care registers, medication use (drug registers), hospital admissio…
								controls	1,673/2,995	NA	25.88 (4.20)	NA
FHS	Framingham Heart Study	family-based	White European Americans	8333	≥97%	1) heterozygosity outliers; 2) > 1000 Mendelian errors	Dawber TR, et al. Epidemiological approaches to heart disease: the Framingham Study. Am J Public Health Nations Health. 1951;41(3):279-81. Feinleib M, et al. The Framingham Offspring Study. Design and preliminary data. Prev Med. 1975;4(4):518-25. Splansky GL, et al. The Third Generation Cohort of the National Heart, Lung, and Blood Institute's Framingham Heart Study: design, recruitment, and init…	cases	386/287	63.7 (12.4)	31.4 (6.5)	8.58 (2.84)	Affymetrix GeneChip 500K & MIPS 50K	BRLMM	≥1%	≥95%	>10-6	412053	MACH/minimac	10629016	R (geepack)	Age, Sex, Cohort, 10 PCs	NA	On treatment or fasting glucose ≥ 7 (when available) or casual glucose ≥ 11.1
								controls	3,441/4,219	52.3 (16.0)	27.0 (5.1)	5.27 (0.52)
FUSION	Finland-United States Investigation of NIDDM Genetics	Case-control	White European	2335	>97.5	heterozygosity, gender check, relatednes	Scott LJ, et al. A genome-wide association study of type 2 diabetes in Finns detects multiple susceptibility variants. Science 2007; 316:1341-1345.	cases	653/508	62.9 (7.6)	30.2 (4.7)	9.4 (3.1)	Illumina 300K	GenomeStudio	>1%	>95%	>10-6	306552	Mach and Minimac	10529139	EPACTS		53.7 ± 9.1
								controls	574/600	63.6 (7.4)	27.1 (3.9)	5.3 (0.5)
GoDARTS	Genetics of Diabetes and Audit Research in Tayside Scotland	Case/Control	White European	5941	≥98%	1) ethnic outliers 2) related individuals and duplicates 3) missing body weight and height	Morris AD, et al. The diabetes audit and research in Tayside Scotland (DARTS) study: electronic record linkage to create a diabetes register. DARTS/MEMO Collaboration. BMJ. 1997;315(7107):524-8. Metspalu,A. The Estonian Genome Project. Drug Development Research 62, 97-101 (2004).	cases	1,773/1,525	73.5 (12)	31.1 (5.7)	NA	Affymetrix 6.0 SNP array	Brllm	≥1%	≥99%	>10-6	688587	IMPUTE2	10839616	SNPtest	3 PCs	[66(11.4)/68.1(11.6)]	Patients with T2D were identified from electronic medical records [PMCID:2127363]. Population based non-diabetic controls from the WTCCC2 (NBS and 58C) were used.
								controls	1,376/1,267	NA	NA	NA
HPFS	HSPH, Health Professionals Follow-up Study	population-based	White European	2422	≥97%	1) ethnic outliers 2) related individuals and duplicates 3) missing body weight and height	Qi L, et al. Genetic variants at 2q24 are associated with susceptibility to type 2 diabetes. Hum Mol Genet. 2010; 19(13):2706-15.	cases	-/1,124	55.59 (8.57)	27.75 (4.01)	NA	Affymetrix	GenomeStudio	≥1%	≥97%	>10-6	607569	MACH	13203821	SNPtest		NA	Type 2 diabetes cases were defined as self-reported diabetes confirmed by a validated supplementary questionnaire. For cases before 1998, we used the National Diabetes Data Group criteria to define type 2 diabetes. We used the American Diabetes Association diagnostic criteria for type 2 diabetes diagnosis from 1998 onward. Control subjects were defined as those free of diabetes at the time of dia…
								controls	-/1,298	55.47 (8.36)	25.00 (2.73)	NA
KORAgen	KORAgen Study Helmholtz zentrum München	population-based	White European	1898	≥95%	Non-fasting individuals,Type 1 diabetes, diabetic treatment,Known T2D, FG ≥ 7mmols.	Wichmann HE, et al. KORA-gen--resource for population genetics, controls and a broad spectrum of disease phenotypes. Gesundheitswesen. 2005;67 Suppl 1:S26-30.	cases	201/146	65.62 (8.16)	30.94 (5.21)	NA	Affymetrix 500k	BRLMM	≥1%	≥93%	>10-6	379392	IMPUTE	14905632	SNPtest	Age, Sex	NA	T2D was self reported
								controls	764/786	61.94 (10.10)	27.94 (4.36)	NA
NHS	HSPH, Nurses' Health Study	population-based	White European	3221	≥97%	1) ethnic outliers 2) related individuals and duplicates 3) missing body weight and height	Qi L, et al. Genetic variants at 2q24 are associated with susceptibility to type 2 diabetes. Hum Mol Genet. 2010; 19(13):2706-15.	cases	-/1,467	53.59 (6.67)	27.44 (5.02)	NA	Affymetrix	GenomeStudio	≥1%	≥97%	>10-6	606626	MACH	13400350	SNPtest		NA	Type 2 diabetes cases were defined as self-reported diabetes confirmed by a validated supplementary questionnaire. For cases before 1998, we used the National Diabetes Data Group criteria to define type 2 diabetes. We used the American Diabetes Association diagnostic criteria for type 2 diabetes diagnosis from 1998 onward. Control subjects were defined as those free of diabetes at the time of dia…
								controls	-/1,754	53.17 (6.68)	23.48 (3.91)	NA
PIVUS	Prospective Investigation of the Vasculature in Uppsala Seniors	population-based	White European	949	≥95%	Related individuals and ethnic outliers	Lind, L. et al. A comparison of three different methods to evaluate endothelium-dependent vasodilation in the elderly: the Prospective Investigation of the Vasculature in Uppsala Seniors (PIVUS) study. Arterioscler Thromb Vasc Biol 2005;25:2368-75.	cases	65/46	70.19 (0.14)	29.10 (5.26)	NA	Illumina Omni-Express and Metabochip	GenomeStudio	>=1%	>=95% (>=99% if MAF<5%)	>10-6	738583	IMPUTE2	12510695	SNPTEST	Age, Sex, 2 PCs	NA	Case definition: known T2D or fasting whole blood glucose > 6.1
								controls	409/429	70.20 (0.18)	26.78 (4.15)	NA
RS-I	Rotterdam Study	population-based	White European	5873	>98%	heterozygosity, gender check, relatedness and ethnic outliers	Hofman A, et al. The Rotterdam Study: 2014 objectives and design update. Eur J Epidemiol 2013;28(11):889-926	cases	251/403	73.38 (9.14)	26.77 (4.10)	NA	Illumina 550 and 610K	Beadstudio	>1%	>98%	>10-6	507807	Mach 1.0 and Minimac v. 2012.8.6	12956519	ProbABEL		NA	T2D was defined as non-fasting glucose ≥ 11.1 mmol/L OR 2h glucose ≥ 11.1 mmol/L (non-fasting at timepoint zero) OR use of diabetes medication
								controls	2,111/3,108	68.70 (8.94)	26.21 (3.62)	NA
ULSAM	Uppsala Longitudinal Study of Adult Men	population-based	White European	1119	≥95%	Related individuals and ethnic outliers	Ingelsson E, et al. Insulin resistance and risk of congestive heart failure. JAMA 2005;294:334-41.	cases	166/0	71.03 (0.66)	27.93 (3.94)	NA	Illumina 2.5M and Metabochip	GenomeStudio	>=1%	>=95% (>=99% if MAF<5%)	>10-6	1621481	IMPUTEv2	12809094	SNPTEST	2 PCs	NA	Case definition: hospital discharge register-defined diabetes before 2002
								controls	953/0	70.99 (0.63)	25.97 (3.22)	NA
WTCCC	Wellcome Trust Case-Control Consortium	population-based	White European	4862	>97%	heterozygosity, gender check, relatedness and ethnic outliers	Zeggini E, et al. Replication of genome-wide association signals in UK samples reveals risk loci for type 2 diabetes. Science 2007;316(5829):1336-41.	cases	1,118/806	58.6 (9.2)	30.7 (6.1)	NA	Affymetrix GeneChip 500K	Chiamo++	>1%	>0.95 for MAF>0.05 >0.99 for MAF<0.05	>10‐3	401346	IMPUTEv2	15169748	SNPTEST		50.3 (9.2)
								controls	1,446/1,492	NA	NA
* Fasting Plasma Glucose. If glucose measurement was made in blood, you should adjust it by multiplying by 1.13. If you have mg/dl units, then multiply values by 0.0555 to get mmol/L.
^BioME - MSSMIPM
Abbreviations: NA - not available

## Sheet: ST2
Supplementary Table 2. Comparison of the autosomal SNV coverage between March 2012 1000 Genomes reference set and the present study.
Minor allele frequency (MAF)a	1000G March 2012 Reference panel (EUR samples)	DIAGRAM 1000G M-Ab (Of those in 1000G EUR)	DIAGRAM M-Ac (N>50%)	DIAGRAM M-A (mean_info >0.8)d	DIAGRAM M-A (mean_info >0.8 & N>50%)e
0.001<=<MAF<0.005	5853556	1,725,634 (0.29)	1,237,882 (0.21)	1,561,967 (0.21)	709,952 (0.12)
0.005<=<MAF<0.01	1442406	1,336,168 (0.93)	1,100,658 (0.76)	903,451 (0.63)	547,168 (0.37)
0.01<=MAF<0.02	1195178	1,182,054 (0.99)	1,112,378 (0.93)	942,574 (0.79)	683,847 (0.57)
0.02<=MAF<0.03	590255	586,820 (0.99)	575,783 (0.98)	517,727 (0.88)	417,229 (0.71)
0.03<=MAF<0.04	482786	480,269 (0.99)	475,074 (0.98)	437,943 (0.91)	373,437 (0.77)
0.04<=MAF<0.05	328952	327,244 (0.99)	324,662 (0.99)	303,573 (0.92)	267,983 (0.81)
MAF>=0.05	5972408	5,956,112 (1)	5,942,174 (0.99)	5,797,687 (0.97)	5,527,968 (0.93)
total	15865541	11,594,301 (0.73)	10,768,611 (0.68)	10,464,922 (0.66)	8,527,584 (0.54)
a MAF is based on MAF in March 2012 1000G EUR samples
b proportion of the SNPs with INFO score >= 0.4 against the total SNP from 1000 Genomes reference panel. INFO, imputation quality score derived by IMPUTE2
c further restricted to be present in at least 50% (N=79,093) of the total sample size
d further restricted such that only variants imputed at info > 0.8 were included in the meta-analysis
e further restricted such that only variants imputed at info > 0.8 were included in the meta-analysis, and SNPs present in at least 50% of the total sample size

## Sheet: ST3
Supplementary Table 3. Results for established, novel and additional distinct signals from the main analysis.
Markername	Chr	Position_b37	Locus	rsid	New lead SNP at the locus following credible set analysis, annotated with ^	Additional dinstinct signal annotated with $	Number of SNPs in 99% credible set £	EA	NEA	EAF	OR	CI	p-value in stage 1	Sample size	Discovery study and population	eQTL	DEPICT (FDR<0.05)**	Literature***	GWAs signals for other phenotypes ¥
1:40035928	1	39835817	MACF1	rs3768321			251	T	G	0.1926	1.08	1.05-1.11	8.11e-07	158184	GWAS, European	-	-	-	C-reactive protein levels,HDL cholesterol,Red blood cell traits
1:51109269	1	51109269	FAF1	rs12031920	^		1903	T	A	0.5555	1.05	1.03-1.08	3.8e-05	158184	GWAS, trans-ancestry	-	-	-	QRS duration
1:120554048	1	120554048	NOTCH2	rs406767	^		73	C	T	0.09	1.14	1.08-1.20	7.5e-07	136187	GWAS, European	NOTCH2 (Liver)	-	-	Crohn's disease
1:154336716	1	154336716	ATP8B2	rs67156297				A	G	0.2538	1.03	1.00-1.06	0.02693	158184	GWAS, Japanese				Asthma,C-reactive protein,C-reactive protein levels,Cerebrospinal fluid levels of Alzheimer's disease-related proteins,Fibrinogen,Protein quantitative trait loci,Rheumatoid arthritis
1:214159256	1	214159256	PROX1	rs340874	^		21	C	T	0.5502	1.07	1.04-1.10	3.4e-08	158184	GWAS, European	-	-	-	Fasting glucose-related traits,Fasting glucose-related traits (interaction with BMI)
2:27748539	2	27748539	GCKR	rs145819220	^		-	G	C	0.0115	1.26	1.08-1.48	0.003	141555	GWAS, European	C2orf16; HSS00291930; XM_212496 (all liver)	-	-	Blood metabolite levels,Blood metabolite ratios,C-reactive protein,C-reactive protein levels,Calcium levels,Cardiovascular disease risk factors,Cholesterol, total,Chronic kidney disease,Crohn's disease,Fasting glucose-related traits,Fasting glucose-related traits (interaction with BMI),Fasting insulin-related traits,Fasting insulin-related traits (interaction with BMI),Fasting plasma glucose,Glyc…
2:43734847	2	43734847	THADA	rs6757251	^		162	C	T	0.9011	1.14	1.10-1.19	1.9e-10	158186	GWAS, European	THADA (CD14+ monocytes); ENVV1 (Liver)	-	-	Age-related hearing impairment (interaction),Crohn's disease,Inflammatory bowel disease,Orofacial clefts,Platelet counts,Polycystic ovary syndrome,Prostate cancer
2:53397048	2	53397048	ASB3	rs9309245				G	C	0.3369	1.01	0.98-1.04	0.481	152599	GWAS, Japanese				-
2:57287411	2	57287411	CCDC85A	rs1116357				G	A	0.5111	1.01	0.99-1.04	0.3457	158186	GWAS, Japanese				-
2:60552476	2	60552476	BCL11A	rs10193447	^		26	T	C	0.5979	1.07	1.05-1.10	1.3e-08	158186	GWAS, European	-	-	-	-
2:135479980	2	135479980	TMEM163	rs6723108			-	T	G	0.499	1.02	1.00-1.05	0.091	158186	non-European	-	-	-	Blood metabolite levels,Parkinson's disease
2:151637936	2	151637936	RBM43/RND3	rs7560163			-	C	G	0.9967	1.17	0.80-1.71	0.412	39866.9	non-European	-	-	-	Immune reponse to smallpox (secreted IFN-alpha)
2:161131694	2	161131694	RBMS1	rs1563575	^		88	A	G	0.742	1.07	1.04-1.10	6.7e-07	158186	non-European	-	-	-	-
2:165689720	2	165689720	GRB14	rs28584669	^		-	T	C	0.8333	1.05	1.02-1.09	0.002	158186	GWAS, European	-	-	-	Fasting insulin-related traits (interaction with BMI),HDL cholesterol,Sexual dimorphism in anthropometric traits,Triglycerides,Waist-hip ratio
2:227117778	2	227117778	IRS1	rs2972156	^		85	G	C	0.6143	1.08	1.05-1.11	1.2e-09	158186	GWAS, European	IRS1 (Omental adipose)	-	-	Adiponectin levels,Adiposity,Fasting insulin-related traits (interaction with BMI),HDL cholesterol,Triglycerides and other traits
2:230522398	2	230522398	DNER	rs1861612			-	A	G	0.543	1.02	1.00-1.05	0.094	152599	non-European	-	-	-	-
3:12344730	3	12344730	PPARG	rs11712037	^		42	C	G	0.8746	1.14	1.10-1.18	8.6e-13	158185	GWAS, European	-	-	-	Drug-induced liver injury,Platelet counts
3:23455582	3	23455582	UBE2E2	rs35352848	^		65	T	C	0.7771	1.09	1.06-1.12	1.5e-08	158185	GWAS, European	-	-	-	-
3:63944174	3	63944174	PSMD6	rs79819696	^		-	A	G	0.004	1.39	1.12-1.72	0.003	139562	non-European	CTSL2 (Liver)	-	-	Schizophrenia
3:64710850	3	64710850	ADAMTS9	rs7428936	^		14	T	C	0.5905	1.07	1.05-1.10	1e-08	158185	GWAS, European	-	-	-	Age-related macular degeneration,Waist-hip ratio
3:123065778	3	123065778	ADCY5	rs11708067	^		11	A	G	0.7871	1.12	1.08-1.15	8.8e-13	152598	GWAS, European	-	-	-	Birth weight,Fasting glucose-related traits,Fasting glucose-related traits (interaction with BMI),Two-hour glucose challenge
3:185511687	3	185511687	IGF2BP2	rs4402960			30	T	G	0.3056	1.15	1.12-1.18	2.7e-25	152598	GWAS, European	-	-	-	Height
3:186663868	3	186663868	ST6GAL1	rs9820223	^		247	C	T	0.3829	1.06	1.03-1.09	1.5e-05	158185	non-European	-	-	-	Drug-induced liver injury (flucloxacillin)
3:187741842	3	187741842	LPP	rs6777684	^		324	G	A	0.6057	1.05	1.03-1.08	5.9e-05	158185	GWAS, trans-ancestry	-	-	-	Hematological and biochemical traits,Metabolite levels,Renal function-related traits (BUN)
4:744972	4	744972	MAEA	rs1531583	^		2719	T	G	0.054	1.15	1.08-1.22	3.882e-06	144210	non-European	-	-	-	Bladder cancer,Bone mineral density,Height,Parkinson's disease,Recombination rate (females),Recombination rate (males),Urinary bladder cancer
4:6299940	4	6299940	WFS1	rs3821943	^		87	T	C	0.5351	1.1	1.08-1.13	4.2e-16	158185	GWAS, European	WFS1(skin, brain tissues); AL157448 (cerebellum)	-	-	Other traits
4:153397823	4	153397823	TMEM154	rs7660590			523	C	T	0.7162	1.06	1.03-1.08	6.8e-05	158185	GWAS, trans-ancestry (Mahajan et al, 2014)	-	-	-	-
4:185708807	4	185708807	ACSL1 #	rs60780116			67	T	C	0.8354	1.09	1.06-1.13	7.4e-08	158185	Novel 1000G signal	-	ACSL1	ACSL1	Kawasaki disease
5:53301561	5	53301561	ARL15	rs11747901	^		233	G	C	0.1884	1.07	1.04-1.11	1.2e-05	158186	GWAS, trans-ancestry	FST (subutaneous adipose)	-	-	Adiponectin levels,HDL cholesterol
5:55861601	5	55809465	ANKRD55	rs9687833			10	A	G	0.1865	1.1	1.07-1.13	1.617e-09	158186	GWAS, European	-	-	-	Triglycerides
5:55809465	5	55809465	ANKRD55 #	rs173964		$	20	G	A	0.7436	1.06	1.03-1.09	1.4e-05	158186	Novel 1000G dinstinct signal	-	-	-	-
5:76453765	5	76453765	ZBED3	rs6453287	^		39	C	A	0.3041	1.07	1.04-1.09	4.5e-06	158186	GWAS, European	-	-	-	-
5:102338739	5	102338739	PAM	rs78408340		$	-	G	C	0.0094	1.4	1.16-1.68	0.00039	141711	European deCODE study	-	-	-	-
5:102726073	5	102726073	PAM	rs74944275			2842	T	C	0.0414	1.16	1.09-1.24	4.352e-06	158186	European deCODE study	-	-	-	Amyotrophic lateral sclerosis (sporadic),Crohn's disease,Rheumatoid arthritis,Schizophrenia
6:7258847	6	7258847	SSR1/RREB1	rs6923241	^		315	C	T	0.7118	1.07	1.04-1.10	1.6e-06	158185	GWAS, trans-ancestry	-	-	-	Waist-hip ratio
6:20673880	6	20673880	CDKAL1	rs7451008	^		6	C	T	0.2606	1.19	1.16-1.22	3.8e-37	158185	GWAS, European	-	-	-	Birth weight,Body mass index,Crohn's disease,Diabetes (gestational),Fasting plasma glucose,Glycated hemoglobin levels,Glycemic traits,Inflammatory bowel disease and other traits
6:31116526	6	31116526	POU5F1/TCF19	rs115321690	^		326	G	A	0.6776	1.07	1.04-1.10	5.1e-07	152598	GWAS, trans-ancestry	-	-	-	Behcet's disease,Change in intraocular pressure in response to steroid treatment (triamcinolone acetonide),Chronic hepatitis B infection,Chronic obstructive pulmonary disease-related biomarkers,Drug-induced Stevens-Johnson syndrome or toxic epidermal necrolysis (SJS/TEN),Follicular lymphoma,Graves' disease,Height,HIV-1 control,Hypothyroidism,Idiopathic membranous nephropathy,Multiple myeloma,Myas…
6:31347451	6	31347451	HLA-B	rs2244020			-	G	A	0.3668	1.02	1.00-1.05	0.07766	146725	non-European (IMIDIA paper)	-	-	-	AIDS progression,Allergic sensitization,Ankylosing spondylitis,Atopic dermatitis,Behcet's disease,Beta-2 microglubulin plasma levels,Bipolar disorder,CD4:CD8 lymphocyte ratio,Cervical cancer,Chronic hepatitis B infection,Chronic obstructive pulmonary disease-related biomarkers,Coronary heart disease,Crohn's disease,Dengue shock syndrome,Diffuse large B cell lymphoma,Drug-induced liver injury (flu…
6:32594309	6	32594309	HLA-DQA1 #	rs9271774			41	C	A	0.7416	1.1	1.06-1.14	3.3e-07	135283	Novel 1000G signal	HLA-DRB5 (Pancreatic islets, whole blood); HLA-DRB1 (pancreatic islets, adipose, tibial artery, leukocytes, lung, tibial nerve, skin, thyroid)	-	-	Allergic sensitization,Alzheimer's disease (late onset),Antinuclear antibody levels,Asthma,Asthma and hay fever,Autoimmune hepatitis type-1,Celiac disease,Cervical cancer,Cholesterol, total,Chronic lymphocytic leukemia,Complement C3 and C4 levels,Crohn's disease,Drug-induced liver injury (amoxicillin-clavulanate),Epstein-Barr virus immune response (EB--1),Follicular lymphoma,Frontotemporal dement…
6:38228979	6	38228979	ZFAND3	rs143308245	^		-	T	A	0.003	2.02	1.28-3.20	0.003	32103	non-European	-	-	-	Restless legs syndrome
6:39331930	6	39331930	KCNK16	rs139514607	^		-	T	C	0.0033	1.48	1.11-1.99	0.008	128212	non-European	-	-	-	Cholesterol, total
6:126792095	6	126792095	CENPW	rs11759026			125	G	A	0.2371	1.1	1.06-1.13	5.8e-10	158185	GWAS, European	-	-	CENPW/RSPO3/RNF146	Blood pressure,Bone mineral density (paediatric, skull),Bone mineral density (paediatric, upper limb),Height,Infant length,Intracranial volume,Menarche (age at onset),Type 1 diabetes
6:137287702	6	137287702	SLC35D3 #	rs6918311			40	A	G	0.5284	1.07	1.04-1.10	6.7e-07	143306	Novel 1000G signal	-	-	SLC35D3/PEX7/IL20RA	-
7:14922007	7	14922007	DGKB	rs10276674		$	7	C	T	0.1981	1.09	1.06-1.12	5.1e-08	158184	GWAS, European	-	-	-	-
7:15054232	7	15065074	DGKB	rs10238625	^		59	A	G	0.5397	1.07	1.04-1.09	3.214e-08	158184	GWAS, European	-	-	-	Fasting glucose-related traits,Fasting glucose-related traits (interaction with BMI),Fasting plasma glucose,Metabolic syndrome
7:28189411	7	28189411	JAZF1	rs1635852	^		11	T	C	0.5016	1.1	1.07-1.12	3e-14	158184	GWAS, European	-	-	-	Crohn's disease,Height,Rheumatoid arthritis,Systemic lupus erythematosus and Systemic sclerosis
7:44255643	7	44255643	GCK	rs878521	^		103	A	G	0.24	1.05	1.02-1.08	0.00061	158184	Candidate gene study	-	-	-	Fasting glucose-related traits,Fasting glucose-related traits (interaction with BMI),Fasting plasma glucose,Glycated hemoglobin levels,Glycemic traits,Metabolic syndrome,Metabolite levels
7:127246903	7	127246903	PAX4	rs10229583			-	G	A	0.7472	1.04	1.01-1.07	0.009	152597	Ma et al., 2013, Diabetes	-	-	-	-
7:127631181	7	127631181	GCC1	rs73455744	^		-	A	G	0.997	1.93	1.26-2.97	0.003	120549	non-European	-	-	-	-
7:127862802	7	127862802	MIR129-LEP	rs791595			-	G	A	0.8254	1.01	0.98-1.04	0.699	158184	non-European	-	-	-	-
7:130463758	7	130463758	KLF14	rs10954284	^		71	T	A	0.5017	1.06	1.03-1.08	1.8e-05	152597	GWAS, European	ART5; PCYT2; PRDX2; SLC7A10; KLF14 (all subcutaneous adipose tissue	-	-	HDL cholesterol
7:157027753	7	157027753	MNX1 #	rs1182436			220	C	T	0.7977	1.08	1.05-1.12	8.3e-07	156108	Novel 1000G signal	-	-	UBE3C/MNX1	-
8:41519248	8	41519248	ANK1	rs516946			44	C	T	0.775	1.08	1.04-1.11	8.6e-07	158185	GWAS, European	ANK1 (omental and subcutaneous adipose, brain tissues, lung)	-	-	Glycated hemoglobin levels
8:95882365	8	95937502	TP53INP1	rs4734285	^		988	T	C	0.6242	1.06	1.03-1.08	1.503e-05	158185	GWAS, European	-	-	-	-
8:95957984	8	95957984	TP53INP1	rs11786613	^	$	829	C	A	0.0317	1.21	1.12-1.31	1.6e-06	155750	Novel 1000G dinstinct signal	-	-	-	Vincristine-induced peripheral neuropathy in acute lymphoblastic leukemia
8:118185025	8	118185025	SLC30A8	rs3802177			6	G	A	0.6774	1.12	1.09-1.15	1.7e-17	158185	GWAS, European	-	-	-	Fasting glucose-related traits,Fasting glucose-related traits (interaction with BMI),Fasting plasma glucose,Glycated hemoglobin levels,Proinsulin levels
9:4292083	9	4292083	GLIS3	rs10758593			359	A	G	0.4129	1.05	1.02-1.07	0.00029	158183	non-European	-	-	-	Fasting glucose-related traits,Fasting plasma glucose,Thyroid hormone levels,Type 1 diabetes
9:8288059	9	8288059	PTPRD	rs186838848	^		7636	T	C	0.0063	1.46	1.19-1.78	0.00024	134085	non-European	-	-	-	Immune response to measles-mumps-rubella vaccine,Personality dimensions,Restless legs syndrome
9:22132878	9	22132878	CDKN2A/B	rs10965248	^		6	T	C	0.8191	1.15	1.11-1.18	6.445e-17	158183	GWAS, European	-	-	-	-
9:22067004	9	22133284	CDKN2A/B	rs10965223		$	105	A	G	0.5918	1.08	1.05-1.11	4.007e-10	158183	Novel 1000G dinstinct signal	-	-	-	Acute lymphoblastic leukemia (B-cell precursor),Ankle-brachial index,Basal cell carcinoma,Breast cancer,Coronary artery calcification,Coronary artery disease,Coronary heart disease,Glaucoma,Glaucoma (primary open-angle),Glioma,Glioma (high-grade),Intracranial aneurysm,Myocardial infarction (early onset),Optic cup area,Platelet counts,Prostate cancer,Vertical cup-disc ratio
9:22133984	9	22133984	CDKN2A/B	rs10757282		$	5	C	T	0.4362	1.04	1.01-1.06	0.004	152596	Established distinct signal	-	-	-	-
9:22301092	9	22301092	DMRTA1	rs1575972				T	A	0.9663	1.13	1.05-1.21	0.0005494	158183	GWAS, Japanese				Abdominal aortic aneurysm,Atopic dermatitis,Chronic lymphocytic leukemia,Coronary artery calcification,Coronary artery disease,Coronary artery disease or ischemic stroke,Coronary artery disease or large artery stroke,Coronary heart disease,Endometriosis,Fasting plasma glucose,Intracranial aneurysm,Myocardial infarction
9:81900744	9	81900744	TLE4	rs13301067	^		192	G	A	0.9236	1.11	1.06-1.16	1.5e-05	158183	GWAS, European	-	-	-	-
9:84311800	9	84311800	TLE1	rs9410573	^		8	T	C	0.5986	1.08	1.05-1.10	2e-08	158183	GWAS, European	-	-	-	-
9:136155000	9	136155000	ABO #	rs635634			40	T	C	0.18	1.08	1.05-1.12	3.6e-07	158183	Novel 1000G signal	-	-	ABO	Activated partial thromboplastin time,ADAMTS13 activity,Angiotensin-converting enzyme activity,Blood metabolite levels,Blood metabolite ratios,Cholesterol, total,Coagulation factor levels,Coronary artery disease or ischemic stroke,Coronary artery disease or large artery stroke,Coronary heart disease,Duodenal ulcer,E-selectin levels,Elevated serum carcinoembryonic antigen levels,End-stage coagulat…
9:139252148	9	139252148	GPSM1	rs11787792			-	A	G	0.6735	1.04	1.01-1.07	0.013	156107	non-European, Hara K et al. (Hum Mol Genet 2013)	-		-	Crohn's disease,Height,IgA nephropathy,Inflammatory bowel disease,Monocyte chemoattractant protein-1,Thyroid hormone levels,Ulcerative colitis
10:12309269	10	12309269	CDC123/CAMK1D	rs11257659			15	T	C	0.2293	1.08	1.05-1.12	2.7e-08	158186	GWAS, European	CAMK1D (Whole blood); NUDT5 (Whole blood); LOC283070 (Whole blood); 100161388_TGI_at (lung)	-	-	Pulmonary function,Pulmonary function (interaction)
10:70859204	10	70859204	VPS26A	rs10998572	^		501	C	A	0.9345	1.09	1.04-1.15	0.00028	158186	non-European	-	-	-	Glycemic traits (pregnancy),Immune reponse to smallpox (secreted IL-1beta)
10:80942620	10	80942620	ZMIZ1	rs810517	^		15	C	T	0.5146	1.09	1.07-1.12	1.3e-12	152599	GWAS, European	-	-	-	-
10:94466910	10	94444793	HHEX/IDE	rs11187140	^		24	G	A	0.6222	1.14	1.11-1.17	4.183e-26	158186	GWAS, European	KIF11 (Whole blood)	-	-	Dehydroepiandrosterone sulphate levels,Inflammatory bowel disease,Multiple sclerosis
10:114758349	10	114758349	TCF7L2	rs7903146			3	T	C	0.2892	1.34	1.31-1.38	9.2e-108	158186	GWAS, European	-	-	-	Breast cancer,Colorectal cancer,Fasting glucose-related traits,Fasting glucose-related traits (interaction with BMI),Proinsulin levels and other traits
10:121149403	10	121149403	GRK5	rs10886471			-	C	T	0.5046	1.02	0.99-1.04	0.126	158186	non-European	-	-	-	-
10:124186714	10	124186714	PLEKHA1 #	rs2292626			25	C	T	0.5038	1.09	1.06-1.11	1.8e-12	158186	Novel 1000G signal	PLEKHA1 (whole blood, lymph)	-	-	Age-related macular degeneration,Age-related macular degeneration (CNV vs. GA),Age-related macular degeneration (CNV),Age-related macular degeneration (extreme sampling),Age-related macular degeneration (GA),Age-related macular degeneration (wet),Exudative age-related macular degeneration
11:1696849	11	1696849	DUSP8	rs2334499			186	T	C	0.4154	1.05	1.03-1.08	7.3e-05	158185	POE	-	-	-	-
11:2150895	11	2150895	INS-IGF2	rs11564732			-	T	C	0.0246	1.02	0.92-1.13	0.725	144783	non-European	-	-	-	-
11:2215089	11	2215089	MIR4686	rs7107784				G	A	0.2828	1.02	0.99-1.05	0.1331	158185	GWAS, Japanese				Chronic lymphocytic leukemia,D- methylation (parent-of-origin),D- methylation (variation),Prostate cancer,Prostate cancer (early onset),Type 1 diabetes,Type 1 diabetes autoantibodies
11:2663891	11	2663891	KCNQ1	rs756852		$	45	G	A	0.5975	1.09	1.06-1.13	3.592e-10	158185	1000G dinstinct signal	-	-	-	-
11:2692249	11	2692249	KCNQ1	rs231360		$	24	T	C	0.4069	1.08	1.05-1.11	9.524e-10	158185	1000G dinstinct signal	-	-	-	-
11:2843803	11	2843803	KCNQ1	rs233449		$	8	G	A	0.726	1.09	1.06-1.12	2.848e-10	158185	1000G dinstinct signal	-	-	-	-
11:2858546	11	2858546	KCNQ1	rs2237897	^		3	C	T	0.9456	1.25	1.18-1.33	4.9e-13	158185	GWAS, European	-	-	-	Body mass index
11:2906165	11	2906165	KCNQ1	rs191294997		$	1	G	A	0.1426	1.06	1.01-1.10	0.01113	149852	1000G dinstinct signal	-	-	-	-
11:2910191	11	2910191	KCNQ1	rs441613		$	1	C	T	0.6331	1.06	1.03-1.08	3.311e-05	158185	1000G dinstinct signal	-	-	-	-
11:17409572	11	17409572	KCNJ11	rs5219			22	T	C	0.3828	1.07	1.04-1.10	4.3e-08	158185	GWAS, European	KCNJ11 (Whole blood)	-	-	Height,Schizophrenia or bipolar disorder
11:43877934	11	43877934	HSD17B12 #	rs1061810			74	A	C	0.2785	1.08	1.05-1.11	5.3e-09	158185	Novel 1000G signal	HSD17B12 (multiple tissues including Pancreatic islets) *This SNP is in high LD with a SNP in the probe binding site, so results should be interpreted with caution	-	-	Forced vital capacity,Neuroblastoma
11:65364385	11	65364385	MAP3K11 #	rs111669836			83	A	T	0.2485	1.07	1.04-1.10	7.4e-07	158185	Novel 1000G signal	-	MAP3K11	KCNK7/MAP3K11	Acne (severe),Atopic dermatitis,HDL cholesterol,Height,Optic cup area,Urate levels,Vertical cup-disc ratio
11:72428172	11	72428172	ARAP1 (CENTD2)	rs76550717	^		26	A	G	0.8299	1.1	1.07-1.14	3.8e-09	158185	GWAS, European	ARAP1 (CD14+ monocytes); STARD10 (brain tissues_	-	-	Crohn's disease,Fasting glucose-related traits (interaction with BMI),Proinsulin levels,Rheumatoid arthritis
11:92708710	11	92708710	MTNR1B	rs10830963			56	G	C	0.2661	1.08	1.05-1.11	1.7e-07	152598	GWAS, European	MTNR1B (pancreatic islets)	-	-	Diabetes (gestational),Fasting glucose-related traits,Fasting glucose-related traits (interaction with BMI),Fasting plasma glucose,Glucose homeostasis traits,Glycated hemoglobin levels,Glycemic traits,Glycemic traits (pregnancy),Metabolic syndrome,Metabolic syndrome (bivariate traits),Metabolite levels,Obesity-related traits
12:4288001	12	4288001	CCND2 #	rs11063018		$	20	C	T	0.1902	1.09	1.06-1.13	1.3e-07	158183	Novel 1000G dinstinct signal	-	-	-	-
12:4291596	12	4291596	CCND2	rs188827514	^	$	102	A	G	0.9944	1.64	1.32-2.04	6.4e-06	138114	1000G dinstinct signal	-	-	-	-
12:4376089	12	4376089	CCND2	rs4238013	^		3	C	T	0.2001	1.1	1.07-1.14	3.6e-09	158183	GWAS, European	-	-	-	-
12:27962719	12	27962719	KLHDC5	rs7953190	^		61	T	C	0.8031	1.08	1.05-1.11	4.2e-07	158183	GWAS, European	KLHDC5 (Whole blood, multiple cell types); MANSC4 (peripheral artery plaque)	-	-	-
12:31466613	12	31466613	FAM60A	rs147538848				G	A	0.99	1.12	0.79-1.60	0.531	24782	GWAS, Japanese				-
12:66221060	12	66221060	HMGA2	rs2258238	^		107	T	A	0.1002	1.11	1.07-1.16	1.6e-07	158183	GWAS, European	-	-	-	Birth weight,Brain structure,Head circumference (infant),Height,Infant length,Permanent tooth development,Polycystic ovary syndrome,Primary tooth development (number of teeth),Primary tooth development (time to first tooth eruption)
12:71656723	12	71634794	TSPAN8/LGR5	rs6581998	^		536	C	T	0.2707	1.06	1.03-1.09	1.228e-05	158183	GWAS, European	-	-	-	-
12:121432117	12	121432117	HNF1A (TCF1)	rs56348580	^		16	G	C	0.6831	1.08	1.05-1.10	2.5e-08	158183	GWAS, European	-	-	-	C-reactive protein,C-reactive protein and white blood cell count,C-reactive protein levels,Cardiovascular disease risk factors,Cholesterol, total,Gamma gluatamyl transferase levels,Gamma glutamyl transpeptidase,Homocysteine levels,LDL cholesterol,Liver enzyme levels,Liver enzyme levels (gamma-glutamyl transferase),Metabolic traits,N-glycan levels
12:123653592	12	123653592	MPHOSPH9	rs2851437	^		550	A	C	0.7189	1.07	1.04-1.10	2.6e-06	158183	GWAS, trans-ancestry	CDK2AP1; SBNO1; MPHOSPH9; ARL6IP4; C12orf65; SETD8; OGFOD2; ABCB9; PITPNM2 (multiple tissues)	SETD8/SBNO1	-	HDL cholesterol,Head circumference (infant),Height,Schizophrenia
13:23864657	13	23864657	SGCG	rs9552911			-	A	G	0.0075	1.25	0.77-2.01	0.363	109855	Saxena et al (Diabetes 2013)	-	-	-	-
13:75898163	13	75898163	TBC1D4	rs7330796			-	C	T	0.1136	1.02	0.98-1.06	0.3792	152597	Greenland T2D locus (topsignal in Greenland rs61736969 is not available in meta-analysis)	-			-
13:80705315	13	80705315	SPRY2	rs11616380	^		9	G	T	0.7148	1.09	1.07-1.12	3.9e-11	158184	GWAS, European	-	-	-	Orofacial clefts
14:79945162	14	79945162	NRXN3 #	rs10146997			537	G	A	0.2118	1.07	1.04-1.10	4.6e-06	158185	Novel 1000G signal	-	-	NRXN3	Body mass index,Obesity,Waist circumference
15:38822905	15	38822905	RASGRP1	rs7403531			-	T	C	0.213	1.04	1.01-1.07	0.014	152598	non-European	-	-	-	Crohn's disease,Rheumatoid arthritis,Systemic lupus erythematosus
15:40619724	15	40619724	INAFM2	rs67839313				C	T	0.1127	1.03	0.99-1.07	0.1079	158185	GWAS, Japanese				Blood metabolite levels,Blood metabolite ratios,Interstitial lung disease,Metabolic traits,Schizophrenia
15:62117975	15	62117975	C2CD4A	rs4774420	^		46	C	T	0.7024	1.08	1.05-1.11	2.7e-08	158185	non-European	-	-	-	Height
15:77776498	15	77776498	HMG20A	rs952471	^		49	G	C	0.6869	1.08	1.06-1.11	4e-10	158185	GWAS, European	-	HMG20A	-	-
15:80411245	15	80411245	ZFAND6	rs62006309	^		271	A	G	0.5226	1.05	1.03-1.08	4.6e-05	158185	GWAS, European	-	-	-	-
15:90289162	15	90289162	AP3S2	rs62023387	^		-	C	A	0.1834	1.07	1.03-1.11	0.00057	158185	non-European	ANPEP (Liver)	-	-	Blood metabolite levels,Resting oxygen saturation in chronic osbtructive pulmonary disease (pulse oxymetry)
15:91563513	15	91563513	PRC1	rs12595616	^		75	C	T	0.3668	1.07	1.04-1.09	5.6e-07	152598	GWAS, European	-	VPS33B	-	Breast cancer
16:53803574	16	53803574	FTO	rs1558902	^		64	A	T	0.4155	1.13	1.11-1.16	4.7e-25	158182	GWAS, European	-	-	-	Adiposity,Body mass in chronic obstructive pulmonary disease,Body mass index,Breast cancer,Dietary macronutrient intake,HDL cholesterol,Height adjusted BMI,Menarche (age at onset),Metabolic syndrome,Obesity,Obesity-related traits,Obesity (early onset extreme),Obesity (extreme),Triglycerides,Waist circumference,Weight
16:75252327	16	75252327	BCAR1	rs8056814	^		13	G	A	0.9168	1.16	1.11-1.22	3.7e-11	158182	GWAS, European	BCAR1 (Whole blood)	-	-	Pancreatic cancer,Pulmonary function,Pulmonary function (interaction),Type 1 diabetes
16:81534790	16	81534790	CMIP #	rs2925979			3	T	C	0.2977	1.08	1.05-1.10	2.7e-08	158182	Novel 1000G signal	-	-	-	Adiponectin levels,HDL cholesterol
17:2309188	17	2309188	SRR	rs9911305	^		-	A	G	0.7016	1.05	1.02-1.07	0.001	158182	non-European	-	MNT	-	Aortic root size,Coronary heart disease,Esophageal cancer (squamous cell),Proinsulin levels,Schizophrenia
17:4014384	17	4014384	ZZEF1 #	rs7224685			307	T	G	0.3043	1.07	1.04-1.10	2e-07	158182	Novel 1000G signal	trans eQTL for ACCN4 (subcutaneous adipose)	ZZEF1/ANKFY1	ZZEF1	-
17:6946287	17	6946287	SLC16A11/A13	rs13342692			-	C	T	0.0147	1.07	0.94-1.22	0.303	145933	non-European, in high LD with other SNPs (rs13342232 and rs312457) reported in this locus	-			Blood metabolite levels,Cholesterol, total,LDL cholesterol,Liver enzyme levels (alkaline phosphatase),Metabolite levels
17:9780387	17	9780387	GLP2R #	rs78761021			87	G	A	0.3414	1.07	1.05-1.10	5.5e-08	158182	Novel 1000G signal	-	-	GLP2R	-
17:36102833	17	36102833	HNF1B (TCF2)	rs757209	^		13	G	A	0.578	1.09	1.06-1.12	1.1e-09	149849	GWAS, European	-	-	-	Endometrial cancer,Ovarian cancer,Prostate cancer,Serum prostate-specific antigen levels,Testicular germ cell tumor
17:46967038	17	46967038	GIP #	rs79349575			172	A	T	0.5061	1.07	1.04-1.09	2.6e-07	158182	Novel 1000G signal	UBE2Z (LCL)	UBE2Z	ATP5G1/GIP	Coronary heart disease,Height
18:7067652	18	7068462	LAMA1	rs7234111			28	C	T	0.364	1.06	1.04-1.09	7.711e-07	158184	European associated with lean T2D	-	-	-	-
18:57793209	18	57793209	MC4R	rs1942880	^		168	T	C	0.3323	1.07	1.04-1.10	2.818e-07	152597	other	-	-	-	Body mass index,Fat body mass,Obesity (early onset extreme)
18:58034883	18	58034883	MC4R	rs79851087	^	$	-	A	G	0.9721	1.19	1.09-1.28	3.2e-05	156336	GWAS, European	-	-	-	Antipsychotic drug-induced weight gain,Body mass index,HDL cholesterol,Height,Obesity,Obesity (early onset extreme),Waist circumference and related phenotypes,Weight
18:60845884	18	60845884	BCL2A	rs12454712			-	T	C	0.6186	1.05	1.02-1.08	0.002	149851	non-European	-	-	-	Chronic lymphocytic leukemia,Follicular lymphoma
19:19456917	19	19456917	CILP2	rs58489806	^		1358	T	C	0.0913	1.09	1.04-1.13	0.0001	158186	GWAS, European	ATP13A1 (Whole blood, breast tumour, monocytes)	-	-	Bipolar disorder,Cholesterol, total,Height,LDL cholesterol,Schizophrenia,Sphingolipid levels,Triglycerides
19:33943994	19	33943994	PEPD	rs139990642	^		-	A	G	0.0111	1.25	1.08-1.45	0.002	133834	non-European	-	-	-	Adiponectin levels,Crohn's disease,HDL cholesterol,Inflammatory bowel disease (early onset),Triglycerides
19:45411941	19	45411941	APOE	rs429358			4	T	C	0.8475	1.13	1.09-1.17	1.4e-10	152543	GWAS, trans-ancestry	-	-	APOE	Age-related macular degeneration,Alzheimer's disease,Alzheimer's disease (age of onset),Alzheimer's disease (late onset),Alzheimer's disease biomarkers,Apolipoprotein Levels,Blood metabolite ratios,C-reactive protein,C-reactive protein levels,Cardiovascular disease risk factors,Carotid intima media thickness,Cerebral amyloid angiopathy,Cerebrospinal AB1-42 levels in Alzheimer's disease dementia,C…
19:46160246	19	46160246	GIPR	rs55864746	^		30	A	G	0.3085	1.07	1.04-1.10	1.8e-06	158186	GWAS, European	GIPR (Whole blood)	SYMPK	-	Body mass index,Obesity,Two-hour glucose challenge
20:42994812	20	42994812	HNF4A	rs12625671		$	136	C	T	0.1091	1.09	1.05-1.13	7.4e-06	158182	non-European	-	-	-	-
20:43042364	20	43042364	HNF4A	rs1800961	^		1	T	C	0.0374	1.17	1.09-1.25	4.373e-06	152595	1000G dinstinct signal	-	-	-	C-reactive protein levels,Cholesterol, total,HDL cholesterol
22:30599562	22	30599562	MTMR3/HORMAD2	rs2023681			153	G	A	0.8878	1.13	1.09-1.18	3.9e-09	158183	GWAS, European	-	MTMR3	-	Crohn's disease,IgA nephropathy,Inflammatory bowel disease,Inflammatory bowel disease (early onset),LDL cholesterol,Lung cancer,Nephropathy,Optic disc area,Type 1 diabetes
23:152899922	23	152899922	DUSP9	rs5945326			-	A	G	0.7455	1.2	1.09-1.32	0.0003	5884.92	GWAS, European	-	-	-	-
			# 13 novel loci and 2 additional distinct signals detected in our study
			^ new lead SNP at the locus
			$ additional distinct signals at the locus
			£ Signals reaching p<5x10-4 were selected to the credible set analysis.
			* Lead 1000G SNV position for each locus (from the credible set analysis)
			**Significant (FRD<0.05) genes derived by DEPICT analysis using discovery set of independent signals (P<10-5), established loci and monogenic diabetes genes (NOTE:in red, DEPICT results on other positions within the locus, not exact same position)
			***most plausible candidate inferred from the literature
			¥ Phenotypes with reported genome-wide significant associations in NHGRI-EBI GWAS Catalog as by 10/12/2015. We report here associations for signals that fell within the LD window as reported in ST5 or +/ 200kb for variants not present in ST5 of our reported signal. Additionally, we checked signals by gene name from the following sources not in GWAS Catalog: Marullo et al. Curr Diab Rep (2014) 14:…

## Sheet: ST4
Supplementary Table 4. The estimated odds ratios (OR) with their 95% confidence intervals (CI) of the established and novel T2D loci on T2D from BMI-adjusted and unadjusted association analysis models obtained from the 15 studies that contributed both unadjusted and BMI-adjusted analysis.
								BMI unadj				BMI adj
markername	chr	position_b37	Locus	rsid	allele1	allele2	freq1	OR	CI 95%	P-value	N	OR	CI 95%	P-value	N	T statistic	Heterogeneity P-value
1:40035928	1	39835817	MACF1	rs3768321	T	G	0.1931	1.08	1.05-1.12	4.559e-06	138597	1.07	1.03-1.11	0.000368	111307	1.576	0.115025
1:51109269	1	51109269	FAF1	rs12031920	T	A	0.5509	1.05	1.02-1.08	0.0004694	138597	1.06	1.03-1.09	0.0001339	111307	1.44696	0.147909
1:120554048	1	120554048	NOTCH2	rs406767	C	T	0.0913	1.12	1.06-1.19	0.0001153	116600	1.16	1.09-1.24	6.46e-06	89581.8	2.36153	0.0181995
1:154336716	1	154336716	ATP8B2	rs67156297	A	G	0.254	1.04	1.01-1.07	0.00729	138597	1.04	1.00-1.07	0.03443	111307	0.844124	0.3986
1:214159256	1	214159256	PROX1	rs340874	C	T	0.5486	1.07	1.04-1.10	8.08e-07	138597	1.07	1.04-1.10	4.474e-06	111307	0.130064	0.896516
2:27748539	2	27748539	GCKR	rs145819220	G	C	0.0122	1.2	1.01-1.43	0.03637	121968	1.26	1.04-1.52	0.01563	94791	1.11865	0.263291
2:43734847	2	43734847	THADA	rs6757251	C	T	0.9043	1.14	1.09-1.19	2.908e-08	138599	1.15	1.09-1.21	2.713e-08	111309	1.12867	0.259036
2:53397048	2	53397048	ASB3	rs9309245	G	C	0.3363	1	0.98-1.03	0.8679	138599	1	0.97-1.03	0.9117	111309	-0.0943224	0.924853
2:57287411	2	57287411	CCDC85A	rs1116357	G	A	0.5118	1.01	0.99-1.04	0.2628	138599	1.02	0.99-1.05	0.1821	111309	0.746916	0.455114
2:60552476	2	60552476	BCL11A	rs10193447	T	C	0.5994	1.08	1.05-1.11	8.745e-08	138599	1.08	1.05-1.11	2.26e-07	111309	-0.641546	0.521168
2:135479980	2	135479980	TMEM163	rs6723108	T	G	0.4944	1.02	0.99-1.04	0.2313	138599	1.02	0.99-1.05	0.146	111309	-0.854555	0.392798
2:151637936	2	151637936	RBM43/RND3	rs7560163	C	G	0.9964	1.12	0.71-1.75	0.6341	21654	1.26	0.77-2.06	0.3624	21465.9	-1.13418	0.256717
2:161131694	2	161131694	RBMS1	rs1563575	A	G	0.7477	1.06	1.03-1.10	7.834e-05	138599	1.07	1.03-1.11	6.43e-05	111309	-0.867845	0.385479
2:165689720	2	165689720	GRB14	rs28584669	T	C	0.8335	1.06	1.02-1.10	0.001393	138599	1.07	1.03-1.11	0.0006245	111309	-1.13943	0.254525
2:227117778	2	227117778	IRS1	rs2972156	G	C	0.612	1.08	1.05-1.11	1.202e-08	138599	1.1	1.07-1.13	1.16e-10	111309	2.93227	0.00336496
2:230522398	2	230522398	DNER	rs1861612	A	G	0.5415	1.03	1.00-1.05	0.04836	138599	1.02	0.99-1.05	0.2689	111309	1.69083	0.09087
3:12344730	3	12344730	PPARG	rs11712037	C	G	0.8735	1.14	1.10-1.19	1.172e-10	138598	1.16	1.12-1.22	4.962e-12	111308	-2.31419	0.0206571
3:23455582	3	23455582	UBE2E2	rs35352848	T	C	0.7739	1.08	1.04-1.11	5.516e-06	138598	1.09	1.05-1.13	9.87e-07	111308	-1.73472	0.0827901
3:63944174	3	63944174	PSMD6	rs79819696	A	G	0.0036	1.42	1.10-1.84	0.007553	119975	1.52	1.15-2.00	0.003384	92697	-1.0764	0.281749
3:64710850	3	64710850	ADAMTS9	rs7428936	T	C	0.5902	1.08	1.05-1.11	7.691e-09	138598	1.09	1.06-1.12	1.91e-09	111308	-1.6632	0.0962726
3:123065778	3	123065778	ADCY5	rs11708067	A	G	0.7897	1.11	1.08-1.15	7.644e-11	138598	1.13	1.09-1.17	2.157e-11	111308	-1.66855	0.095206
3:185511687	3	185511687	IGF2BP2	rs4402960	T	G	0.3041	1.15	1.12-1.18	1.562e-22	138598	1.16	1.13-1.20	1.372e-22	111308	-1.9422	0.0521125
3:186663868	3	186663868	ST6GAL1	rs9820223	C	T	0.3815	1.06	1.03-1.09	7.378e-05	138598	1.06	1.03-1.10	0.0001099	111308	0.544558	0.586058
3:187741842	3	187741842	LPP	rs6777684	G	A	0.6044	1.07	1.04-1.09	3.786e-06	138598	1.06	1.03-1.09	4.433e-05	111308	-0.368889	0.712211
4:744972	4	744972	MAEA	rs1531583	T	G	0.0556	1.15	1.08-1.22	3.065e-05	124623	1.16	1.08-1.24	5.187e-05	97442.9	-0.665113	0.505978
4:6299940	4	6299940	WFS1	rs3821943	T	C	0.535	1.1	1.08-1.13	1.485e-13	138598	1.1	1.07-1.14	2.518e-11	111308	0.227611	0.819949
4:153397823	4	153397823	TMEM154	rs7660590	C	T	0.7164	1.04	1.01-1.07	0.01279	138598	1.03	1.00-1.06	0.05613	111308	-0.909224	0.363232
4:185708807	4	185708807	ACSL1 #	rs60780116	T	C	0.8333	1.1	1.07-1.15	5.66e-08	138598	1.11	1.07-1.16	1.022e-07	111308	-0.800751	0.423276
5:53301561	5	53301561	ARL15	rs11747901	G	C	0.1885	1.06	1.03-1.10	0.0004926	138599	1.08	1.04-1.12	0.0001954	111309	1.24328	0.213766
5:55861601	5	55809465	ANKRD55	rs9687833	A	G	0.1823	1.09	1.06-1.13	3.718e-07	138599	1.1	1.06-1.14	1.298e-06	111309	-0.362793	0.71676
5:55809465	5	55809465	ANKRD55 #	rs173964	G	A	0.7426	1.07	1.04-1.10	2.205e-05	138599	1.08	1.05-1.12	2.612e-06	111309	1.89509	0.0580808
5:76453765	5	76453765	ZBED3	rs6453287	C	A	0.3019	1.05	1.02-1.08	0.0008491	138599	1.05	1.02-1.08	0.003908	111309	-0.417572	0.67626
5:102338739	5	102338739	PAM	rs78408340	G	C	0.0069	1.56	1.25-1.96	0.000111	122124	1.68	1.31-2.14	3.385e-05	94948.9	1.36887	0.171041
5:102726073	5	102726073	PAM	rs74944275	T	C	0.0397	1.18	1.10-1.27	5.701e-06	138599	1.22	1.13-1.32	5.926e-07	111309	-1.96787	0.0490832
6:7258847	6	7258847	SSR1/RREB1	rs6923241	C	T	0.7107	1.06	1.03-1.09	0.0001696	138598	1.06	1.02-1.09	0.0005771	111308	-0.0291409	0.976752
6:20673880	6	20673880	CDKAL1	rs7451008	C	T	0.2588	1.19	1.15-1.22	6.864e-30	138598	1.21	1.17-1.25	1.076e-30	111308	2.5509	0.0107445
6:31116526	6	31116526	POU5F1/TCF19	rs115321690	G	A	0.6739	1.07	1.04-1.10	2.231e-06	138598	1.07	1.04-1.11	9.065e-06	111308	0.245142	0.806347
6:31347451	6	31347451	HLA-B	rs74995800	G	A	0.3672	1.02	0.99-1.05	0.2736	132725	1.02	0.99-1.05	0.1879	105597	0.74791	0.454515
6:32594309	6	32594309	HLA-DQA1 #	rs9271774	C	A	0.7309	1.1	1.06-1.15	5.247e-07	121283	1.12	1.08-1.16	2.479e-09	103447	1.94783	0.0514353
6:38228979	6	38228979	ZFAND3	rs143308245	T	A	0.0028	2.55	1.46-4.47	0.001022	21654	2.28	1.27-4.12	0.006144	21466	-0.881134	0.378245
6:39331930	6	39331930	KCNK16	rs139514607	T	C	0.0031	1.61	1.14-2.28	0.006859	109999	1.55	1.07-2.24	0.02032	82883	0.518705	0.603966
6:126792095	6	126792095	CENPW	rs11759026	G	A	0.2362	1.1	1.07-1.14	7.913e-10	138598	1.12	1.08-1.15	5.85e-10	111308	1.33098	0.183197
6:137287702	6	137287702	SLC35D3 #	rs6918311	A	G	0.5285	1.08	1.04-1.11	1.396e-06	129306	1.07	1.04-1.10	2.338e-06	111308	0.484931	0.627725
7:14922007	7	14922007	DGKB	rs10276674	C	T	0.2017	1.08	1.05-1.12	2.539e-06	138597	1.1	1.06-1.14	2.826e-07	111307	1.97914	0.0478003
7:15054232	7	15065074	DGKB	rs10238625	A	G	0.5374	1.07	1.04-1.10	1.07e-06	138597	1.07	1.04-1.10	2.243e-06	111307	-0.580662	0.561468
7:28189411	7	28189411	JAZF1	rs1635852	T	C	0.5052	1.09	1.06-1.12	8.692e-11	138597	1.1	1.07-1.13	3.683e-11	111307	-1.58239	0.113561
7:44255643	7	44255643	GCK	rs878521	A	G	0.2354	1.05	1.02-1.09	0.002058	138597	1.07	1.03-1.11	0.0001289	111307	-2.40272	0.0162738
7:127631181	7	127631181	GCC1	rs73455744	A	G	0.9974	1.96	1.20-3.22	0.00762	107923	2.06	1.19-3.57	0.01029	80807	-0.406655	0.684262
7:127246903	7	127246903	PAX4	rs10229583	G	A	0.7461	1.04	1.01-1.07	0.01866	138597	1.05	1.01-1.08	0.004741	111307	1.59772	0.110105
7:127862802	7	127862802	MIR129-LEP	rs791595	G	A	0.8268	1.01	0.97-1.04	0.6358	138597	1.01	0.97-1.04	0.7821	111307	-0.375421	0.707347
7:130463758	7	130463758	KLF14	rs10954284	T	A	0.4985	1.05	1.02-1.08	0.0004827	138597	1.06	1.03-1.09	0.0001683	111307	1.30958	0.190336
7:157027753	7	157027753	MNX1 #	rs1182436	C	T	0.7983	1.09	1.05-1.13	2.457e-06	136521	1.1	1.06-1.14	2.413e-06	109231	1.01235	0.311371
8:41519248	8	41519248	ANK1	rs516946	C	T	0.7793	1.07	1.04-1.10	4.836e-05	138598	1.07	1.04-1.11	7.531e-05	111308	0.536955	0.591299
8:95882365	8	95937502	TP53INP1	rs4734285	T	C	0.6283	1.06	1.03-1.09	9.269e-05	138598	1.06	1.03-1.09	0.0001289	111308	-0.589801	0.555324
8:95957984	8	95957984	TP53INP1	rs11786613	C	A	0.0337	1.18	1.09-1.28	5.768e-05	136163	1.2	1.09-1.31	9.437e-05	108875	0.547998	0.583693
8:118185025	8	118185025	SLC30A8	rs3802177	G	A	0.6746	1.12	1.09-1.15	2.733e-14	138598	1.15	1.11-1.18	5.764e-18	111308	3.9783	6.94107e-05
9:4292083	9	4292083	GLIS3	rs10758593	A	G	0.4133	1.04	1.02-1.07	0.001202	138596	1.05	1.02-1.08	0.00223	111306	-0.212808	0.831477
9:8288059	9	8288059	PTPRD	rs186838848	T	C	0.0066	1.49	1.20-1.85	0.0002686	115872	1.43	1.13-1.80	0.002504	88594	0.845988	0.39756
9:22133984	9	22133984	CDKN2A/B	rs10757282	C	T	0.4389	1.03	1.00-1.06	0.02198	138596	1.05	1.02-1.08	0.0008471	111306	2.95895	0.00308694
9:22067004	9	22133284	CDKN2A/B	rs10965223	A	G	0.5922	1.07	1.04-1.10	3.455e-07	138596	1.09	1.06-1.12	1.883e-08	111306	-2.24451	0.0247995
9:22132878	9	22132878	CDKN2A/B	rs10965248	T	C	0.819	1.13	1.09-1.17	3.441e-12	138596	1.14	1.10-1.19	1.019e-11	111306	-0.98767	0.323314
9:22301092	9	22301092	DMRTA1	rs1575972	T	A	0.9661	1.11	1.03-1.20	0.00458	138596	1.14	1.05-1.24	0.00128	111306	1.48598	0.137284
9:81900744	9	81900744	TLE4	rs13301067	G	A	0.9211	1.1	1.04-1.16	0.0002998	138596	1.11	1.05-1.18	0.000142	111306	1.13092	0.25809
9:84311800	9	84311800	TLE1	rs9410573	T	C	0.6024	1.07	1.04-1.10	2.142e-06	138596	1.09	1.06-1.13	1.653e-08	111306	-3.08286	0.0020502
9:136155000	9	136155000	ABO #	rs635634	T	C	0.177	1.08	1.04-1.12	1.348e-05	138596	1.07	1.04-1.12	0.0001559	111306	0.537934	0.590623
9:139252148	9	139252148	GPSM1	rs11787792	A	G	0.6732	1.04	1.01-1.08	0.009607	136520	1.04	1.00-1.07	0.04394	109230	0.855627	0.392204
10:12309269	10	12309269	CDC123/CAMK1D	rs11257659	T	C	0.234	1.07	1.03-1.10	5.487e-05	138599	1.08	1.04-1.12	1.38e-05	111309	-1.52449	0.127385
10:70859204	10	70859204	VPS26A	rs10998572	C	A	0.9339	1.1	1.04-1.16	0.0008698	138599	1.11	1.05-1.18	0.0003918	111309	1.14621	0.25171
10:80942620	10	80942620	ZMIZ1	rs810517	C	T	0.5101	1.09	1.06-1.12	3.405e-10	138599	1.09	1.06-1.12	6.137e-09	111309	0.115382	0.908142
10:94466910	10	94444793	HHEX/IDE	rs11187140	G	A	0.6203	1.13	1.10-1.16	3.163e-18	138599	1.14	1.11-1.18	3.881e-19	111309	2.32595	0.0200212
10:114758349	10	114758349	TCF7L2	rs7903146	T	C	0.2877	1.33	1.29-1.37	1.354e-81	138599	1.39	1.35-1.44	3.2e-94	111309	-7.27327	3.50876e-13
10:121149403	10	121149403	GRK5	rs10886471	C	T	0.501	1.02	0.99-1.05	0.1309	138599	1.01	0.98-1.04	0.5017	111309	-1.70708	0.0878065
10:124186714	10	124186714	PLEKHA1 #	rs2292626	C	T	0.4997	1.09	1.06-1.12	1.494e-10	138599	1.09	1.06-1.12	9.595e-10	111309	0.560429	0.575187
11:1696849	11	1696849	DUSP8	rs2334499	T	C	0.417	1.04	1.01-1.07	0.002667	138598	1.05	1.02-1.08	0.0008109	111308	-1.41833	0.156096
11:2150895	11	2150895	INS-IGF2	rs11564732	C	T	0.975	1	0.90-1.12	0.9546	125196	1	0.88-1.13	0.9931	98017.9	-0.103086	0.917895
11:2215089	11	2215089	MIR4686	rs7107784	G	A	0.2808	1.01	0.98-1.05	0.3527	138598	1.01	0.98-1.05	0.4547	111308	-0.239053	0.811065
11:2858546	11	2858546	KCNQ1	rs2237897	C	T	0.945	1.26	1.18-1.34	8.58e-12	138598	1.27	1.18-1.37	5.106e-11	111308	0.790297	0.429354
11:2663891	11	2663891	KCNQ1	rs756852	G	A	0.5934	1.09	1.05-1.12	1.425e-07	138598	1.09	1.05-1.13	4.886e-07	111308	0.453228	0.650385
11:2692249	11	2692249	KCNQ1	rs231360	T	C	0.409	1.08	1.05-1.11	3.019e-08	138598	1.09	1.06-1.13	4.763e-09	111308	-1.81526	0.0694842
11:2843803	11	2843803	KCNQ1	rs233449	G	A	0.73	1.09	1.05-1.12	1.27e-07	138598	1.08	1.05-1.12	1.948e-06	111308	-0.239001	0.811105
11:2906165	11	2906165	KCNQ1	rs191294997	G	A	0.1386	1.03	0.98-1.08	0.1904	130265	1.03	0.98-1.09	0.2158	103085	0.0919151	0.926765
11:2910191	11	2910191	KCNQ1	rs441613	C	T	0.6304	1.05	1.03-1.08	0.0001913	138598	1.05	1.02-1.08	0.001162	111308	-0.413677	0.679111
11:17409572	11	17409572	KCNJ11	rs5219	T	C	0.3867	1.06	1.04-1.09	4.408e-06	138598	1.09	1.06-1.12	2.17e-08	111308	-3.2941	0.000987362
11:43877934	11	43877934	HSD17B12 #	rs1061810	A	C	0.2768	1.08	1.05-1.12	1.775e-07	138598	1.06	1.03-1.10	0.0001847	111308	2.54863	0.0108147
11:65364385	11	65364385	MAP3K11 #	rs111669836	A	T	0.2484	1.07	1.03-1.10	4.895e-05	138598	1.07	1.04-1.11	2.68e-05	111308	-1.13877	0.254799
11:72428172	11	72428172	ARAP1 (CENTD2)	rs76550717	A	G	0.8281	1.09	1.05-1.13	3.199e-06	138598	1.11	1.07-1.16	2.92e-08	111308	-3.01833	0.00254168
11:92708710	11	92708710	MTNR1B	rs10830963	G	C	0.2659	1.07	1.04-1.10	1.118e-05	138598	1.07	1.04-1.11	6.171e-05	111308	-0.0702655	0.943982
12:4384844	12	4384844	CCND2	rs76895963	T	G	0.9793	1.22	1.06-1.41	0.005448	124623	1.23	1.05-1.43	0.008402	97442.9	-0.104716	0.916601
12:4376089	12	4376089	CCND2	rs4238013	C	T	0.1998	1.12	1.08-1.16	4.391e-09	138596	1.14	1.10-1.19	4.788e-11	111306	2.74142	0.00611744
12:4288001	12	4288001	CCND2	rs11063018	C	T	0.1921	1.08	1.04-1.12	1.478e-05	138596	1.09	1.04-1.13	3.794e-05	111306	0.324236	0.745759
12:4291596	12	4291596	CCND2	rs188827514	A	G	0.9951	1.59	1.24-2.04	0.0002672	119901	1.68	1.29-2.21	0.0001466	92623.1	-0.992463	0.320972
12:27962719	12	27962719	KLHDC5	rs7953190	T	C	0.8033	1.09	1.05-1.12	1.627e-06	138596	1.09	1.05-1.13	1.841e-06	111306	-0.865509	0.386759
12:31466613	12	31466613	FAM60A	rs147538848	G	A	0.9894	1.04	0.72-1.51	0.8206	19920	1.04	0.70-1.55	0.8483	19835	-0.0471064	0.962428
12:66221060	12	66221060	HMGA2	rs2258238	T	A	0.0986	1.12	1.07-1.17	3.661e-07	138596	1.14	1.09-1.20	1.057e-07	111306	1.52524	0.127199
12:71656723	12	71634794	TSPAN8/LGR5	rs6581998	C	T	0.2701	1.04	1.01-1.07	0.008049	138596	1.05	1.02-1.09	0.001379	111306	1.84392	0.0651955
12:121432117	12	121432117	HNF1A (TCF1)	rs56348580	G	C	0.6815	1.08	1.05-1.11	2.176e-07	138596	1.06	1.03-1.09	0.0001648	111306	-2.35962	0.0182936
12:123653592	12	123653592	MPHOSPH9	rs2851437	A	C	0.7178	1.06	1.02-1.09	0.0005588	138596	1.07	1.03-1.11	0.0001069	111306	-1.70304	0.0885609
13:23864657	13	23864657	SGCG	rs9552911	A	G	0.0015	1.35	0.69-2.62	0.3784	103619	1.83	0.87-3.85	0.1132	76613	-1.90985	0.0561528
13:80705315	13	80705315	SPRY2	rs11616380	G	T	0.7165	1.09	1.05-1.12	4.757e-08	138597	1.09	1.06-1.13	4.846e-08	111307	1.04088	0.297929
13:75898163	13	75898163	TBC1D4	rs7330796	C	T	0.8865	1.02	0.97-1.06	0.4579	138597	1.02	0.98-1.07	0.3521	111307	0.584317	0.559007
14:79945162	14	79945162	NRXN3 #	rs10146997	G	A	0.2109	1.06	1.03-1.10	0.0001656	138598	1.04	1.00-1.07	0.04029	111308	-3.37504	0.000738061
15:38822905	15	38822905	RASGRP1	rs7403531	T	C	0.2118	1.04	1.01-1.07	0.02142	138598	1.03	1.00-1.07	0.08373	111308	0.913122	0.361178
15:40619724	15	40619724	INAFM2	rs67839313	C	T	0.1129	1.03	0.98-1.07	0.247	138598	1.04	0.99-1.09	0.1053	111308	1.34264	0.179387
15:62117975	15	62117975	C2CD4A	rs4774420	C	T	0.7031	1.07	1.04-1.11	1.527e-06	138598	1.09	1.06-1.13	7.919e-08	111308	2.31557	0.0205816
15:77776498	15	77776498	HMG20A	rs952471	G	C	0.6848	1.08	1.05-1.11	2.255e-08	138598	1.08	1.04-1.11	2.832e-06	111308	-1.07249	0.283498
15:80411245	15	80411245	ZFAND6	rs62006309	A	G	0.5226	1.05	1.02-1.08	0.0002491	138598	1.06	1.03-1.10	2.763e-05	111308	-2.0023	0.0452527
15:90289162	15	90289162	AP3S2	rs62023387	C	A	0.1842	1.08	1.04-1.12	0.0002023	138598	1.07	1.02-1.12	0.002452	111308	-0.915029	0.360177
15:91563513	15	91563513	PRC1	rs12595616	C	T	0.3656	1.07	1.04-1.10	2.23e-06	138598	1.06	1.03-1.10	3.177e-05	111308	-0.430278	0.666993
16:53803574	16	53803574	FTO	rs1558902	A	T	0.4174	1.12	1.09-1.15	5.112e-17	138595	1.05	1.02-1.08	0.002296	111305	11.1702	5.70783e-29
16:75252327	16	75252327	BCAR1	rs8056814	G	A	0.9168	1.16	1.10-1.22	3.389e-09	138595	1.17	1.11-1.23	1.286e-08	111305	0.621635	0.534182
16:81534790	16	81534790	CMIP #	rs2925979	T	C	0.2958	1.08	1.05-1.11	4.538e-07	138595	1.09	1.05-1.12	1.064e-07	111305	-1.63838	0.101342
17:2309188	17	2309188	SRR	rs9911305	A	G	0.7006	1.05	1.02-1.08	0.001063	138595	1.04	1.01-1.08	0.01181	111305	1.16632	0.243485
17:4014384	17	4014384	ZZEF1 #	rs7224685	T	G	0.3015	1.08	1.05-1.11	4.273e-08	138595	1.08	1.05-1.11	6.985e-07	111305	0.13701	0.891023
17:6946287	17	6946287	SLC16A11/A13	rs13342692	C	T	0.0145	1.16	1.01-1.35	0.04114	126346	1.18	1.01-1.39	0.03448	99171	0.545107	0.58568
17:9780387	17	9780387	GLP2R #	rs78761021	G	A	0.3416	1.07	1.04-1.10	5.141e-07	138595	1.06	1.03-1.10	9.058e-05	111305	-1.65	0.0989424
17:36102833	17	36102833	HNF1B (TCF2)	rs757209	G	A	0.5783	1.08	1.05-1.11	7.446e-07	130262	1.08	1.05-1.12	2.112e-06	103082	0.513112	0.607873
17:46967038	17	46967038	GIP #	rs79349575	A	T	0.5047	1.06	1.03-1.09	4.587e-05	138595	1.06	1.03-1.09	0.0003137	111305	0.316609	0.751541
18:7067652	18	7068462	LAMA1	rs7234111	C	T	0.3626	1.06	1.03-1.09	1.297e-05	138597	1.07	1.04-1.10	1.139e-05	111307	0.943559	0.345395
18:58034883	18	58034883	MC4R	rs79851087	A	G	0.9709	1.18	1.08-1.28	0.000179	136749	1.13	1.03-1.25	0.0111	109461	1.97291	0.0485061
18:57793209	18	57793209	MC4R	rs1942880	T	C	0.3332	1.07	1.04-1.10	2.107e-06	138597	1.04	1.01-1.07	0.01387	111307	4.54319	5.54084e-06
18:60845884	18	60845884	BCL2A	rs12454712	T	C	0.6156	1.04	1.01-1.08	0.006739	130264	1.07	1.04-1.11	8.697e-05	103084	-3.44967	0.000561271
19:19456917	19	19456917	CILP2	rs58489806	T	C	0.0907	1.08	1.03-1.13	0.0009698	138599	1.1	1.05-1.15	0.0001875	111309	-1.66891	0.0951359
19:33943994	19	33943994	PEPD	rs139990642	A	G	0.0115	1.27	1.08-1.49	0.003162	114247	1.25	1.05-1.48	0.0117	87233.9	0.514914	0.606613
19:45411941	19	45411941	APOE	rs429358	T	C	0.8455	1.11	1.07-1.16	4.906e-07	132956	1.09	1.05-1.14	0.0001015	105666	1.67332	0.0942646
19:46160246	19	46160246	GIPR	rs55864746	A	G	0.3114	1.06	1.03-1.10	2.702e-05	138599	1.07	1.04-1.10	4.868e-05	111309	-0.513112	0.607873
20:42994812	20	42994812	HNF4A	rs12625671	C	T	0.1102	1.1	1.05-1.14	1.435e-05	138595	1.12	1.07-1.17	2.247e-06	111305	1.76422	0.0776946
20:43042364	20	43042364	HNF4A	rs1800961	T	C	0.0379	1.18	1.10-1.27	4.157e-06	138595	1.19	1.10-1.28	1.124e-05	111305	-0.414631	0.678412
22:30599562	22	30599562	MTMR3/HORMAD2	rs2023681	G	A	0.8885	1.14	1.09-1.19	1.426e-08	138596	1.15	1.09-1.21	2.781e-08	111306	0.806173	0.420143
23:152899922	23	152899922	DUSP9	rs5945326	A	G	0.7273	1.2	1.07-1.35	0.001718	4510.92	1.21	1.07-1.36	0.001699	4508.92	-0.129854	0.896682

## Sheet: ST5
Supplementary Table 5. Estimated power to detect a study variant with a given risk allele frequency (RAF). At the same minor allele frequency (example RAF=0.01 and 0.99), power is higher for variants with low RAF (risk variants) than for variants with high RAF (protective variants). Each power calculation is based on an "average" SNP in the RAF category. aRisk allele frequency is oriented (arbita…
Risk allele frequencya		Power for a given ORb							Average	Average	Average weighted effective case sizee
	1.1	1.2	1.3	1.4	1.5	1.75	2	3	Imputation qualityc	Effective case sized
0.005	0	0	0.003	0.02	0.11	0.7	0.98	1	0.663	27536	18917
0.01	0	0.004	0.09	0.44	0.85	1	1	1	0.716	30524	22436
0.02	0.001	0.11	0.77	0.995	1	1	1	1	0.79	32380	26047
0.03	0.004	0.46	0.99	1	1	1	1	1	0.835	33161	28023
0.04	0.01	0.8	1	1	1	1	1	1	0.864	33844	29521
0.05	0.04	0.95	1	1	1	1	1	1	0.883	33991	30232
0.1	0.36	1	1	1	1	1	1	1	0.921	34001	31472
0.2	0.9	1	1	1	1	1	1	1	0.935	33841	31760
0.5	1	1	1	1	1	1	1	1	0.941	34049	32165
0.8	0.78	1	1	1	1	1	1	1	0.935	33645	31568
0.9	0.2	1	1	1	1	1	1	1	0.925	34083	31695
0.95	0.01	0.61	0.99	1	1	1	1	1	0.887	33820	30255
0.96	0.005	0.36	0.91	1	1	1	1	1	0.875	33855	29892
0.97	0.001	0.13	0.63	0.93	0.99	1	1	1	0.848	33352	28624
0.98	0	0.02	0.19	0.51	0.78	0.99	1	1	0.802	32596	26578
0.99	0	0.001	0.01	0.03	0.085	0.32	0.56	0.93	0.724	30566	22740
0.995	0	0	0	0.001	0.003	0.01	0.04	0.17	0.675	27771	19406

## Sheet: ST6
Supplementary Table 6. Novel signals with suggestive association in Stage 1 (P<10-5) but with no replication (P>5x10-8) in Stage 2 or Independent InterAct/Interact+GERA study analysis.																									Power to see S1 OR in IA
Stage1										Stage2*										Stage1+Stage2
Chr	Position	SNV	EA/NEA	EAF	OR (95% CI)	P-value	captured in HM?	proxy	best HM pval	Chr	Position	SNV	r2 with lead SNV	EA/NEA	EAF	ia_beta	ia_se	OR (95% CI)	P-value	OR (95% CI)	P-value	Stage 1 SNV in HM2	HM2 P-value	HapMap proxy r2	Follow-up	OR
5	3048750	rs16870903	T/C	0.0021	2.98 (1.9-4.68)	2.1e-06		<0.2	-4					T/C	0.006	0.116957	0.28952	1.03 (0.86-1.23)	0.74	1.19 (1.01-1.40)	0.040645			0.2		0.94
8	64660127	rs187357831	T/G	0.009	1.46 (1.25-1.72)	3.1e-06		<0.2	-4					T/G	0.009	-0.119376	0.199123	0.88 (0.72-1.08)	0.23	1.20 (1.06-1.36)	0.003752			0.2		0.63
17	73841419	rs3893328	A/G	0.0097	0.59 (0.48-0.74)	2.26e-06		<0.2	-3					A/G	0.0097	-0.252762	0.219784	0.95 (0.83-1.08)	0.4	0.84 (0.75-0.94)	0.001816			0.2		0.81
8	17730962	rs145953760	A/G	0.0169	1.27 (1.14-1.41)	8.56e-06		>0.4	-5					A/G	0.015	0.16259	0.116763	1.02 (0.91-1.14)	0.79	1.15 (1.06-1.24)	0.00055			0.6		0.48
13	86575869	rs7329157	T/C	0.0283	1.18 (1.1-1.27)	9.72e-06				13	86575869	rs7329157	1	T/C	0.031265			0.93 (0.84-1.02)	0.118267	1.08 (1.02-1.15)	0.010464	Y	0.0039		Metabochip
4	129526996	rs4975241	C/G	0.0607	1.14 (1.08-1.2)	1.32e-06	1							C/G	0.057297	0.100768	0.0568919	1.11(0.95-1.28)	0.185028	1.14 (1.08-1.19)	4.704e-07	Y	0.00018		Metabochip
18	77548685	rs28620500	A/G	0.071	0.85 (0.79-0.91)	3.4e-06		<0.4	-4					A/G	0.06	0.161194	0.082387	1.17(0.95-1.46)	0.146702	0.88 (0.82-0.94)	0.0001248			0.4
4	83563582	rs4693043	A/G	0.144	1.08 (1.05-1.12)	3.16e-06	1							A/G	0.156	-0.0423881	0.037283	0.96(0.87-1.05)	0.385887	1.07 (1.03-1.10)	3.277e-05	Y	0.14		Metabochip
6	65590847	rs7774169	A/G	0.1927	0.93 (0.9-0.96)	4.85e-06				6	65533066	rs10498828	0.935	T/C	0.179848			0.97 (0.94-1.01)	0.162717	0.95 (0.93-0.97)	9.02e-06	Y	0.0004		Metabochip
7	30728452	rs917195	T/C	0.2349	0.93 (0.9-0.96)	1.91e-06		>.6	-5					T/C	0.215	-0.0464543	0.0358654	0.95 (0.87-1.05)	0.327593	0.93 (0.90-0.96)	7.283e-06			0.8
12	21752108	rs10841855	T/G	0.2496	0.93 (0.9-0.96)	1.54e-06	1							T/G	0.23694	-0.0910289	0.0375383	0.91 (0.83-1.01)	0.069443	0.93 (0.90-0.96)	1.992e-06	Y	0.022		Metabochip
5	101620174	rs2548724	T/C	0.2554	1.07 (1.04-1.1)	4.77e-07	1							T/C	0.232	0.0697257	0.0316672	1.07 (0.99-1.17)	0.102557	1.07 (1.04-1.10)	5.667e-07	Y	0.0067		Metabochip
17	48632401	rs898453	A/G	0.274	0.94 (0.91-0.96)	2.05e-06				17	48636534	rs989128	0.5952	A/G	0.358842			0.98 (0.95-1.01)	0.111432	0.95 (0.93-0.97)	4.27e-06
3	170727351	rs1879442	A/G	0.2767	0.94 (0.92-0.97)	4.76e-06				3	170724883	rs8192675	0.9712	C/T	0.295417			0.95 (0.92-0.99)	0.005092	0.95 (0.93-0.97)	1.05e-07
17	27613677	rs12452857	A/G	0.2882	1.06 (1.04-1.09)	5.6e-06				17	27647630	rs797973	0.8376	G/T	0.266709			1.03 (1.00-1.07)	0.044517	1.05 (1.03-1.07)	1.6e-06	Y	0.11		Metabochip
1	219771721	rs4846569	T/C	0.2943	0.93 (0.9-0.95)	8.83e-09				1	219771721	rs4846569	1	T/C	0.284014			0.99 (0.94-1.04)	0.610598	0.94 (0.92-0.96)	1.24e-07
17	17649172	rs11655029	T/C	0.3223	1.06 (1.03-1.09)	6.08e-06				17	17654319	rs11656775	0.9489	A/G	0.332458			1.04 (1.01-1.08)	0.025036	1.05 (1.03-1.08)	6.5e-07
15	54776716	rs11858061	A/G	0.3752	1.06 (1.04-1.09)	1.7e-06				15	54756628	rs4776231	0.9115	A/C	0.382011			1.02 (0.99-1.05)	0.249677	1.04 (1.02-1.06)	1e-05
8	145536056	rs62530366	G/A	0.38	1.08 (1.05-1.11)	1.9e-08								G/A	0.362			1.04 (0.99-1.04)	0.32	1.05 (1.03-1.07)	8.98e-06
12	133683261	rs905226	T/C	0.4508	0.95 (0.92-0.97)	8.8e-06	1							T/C	0.421	-0.0481172	0.0278944	0.95 (0.89-1.03)	0.196372	0.95 (0.93-0.97)	6.016e-05	Y	0.029		Metabochip
9	126123009	rs2491353	T/C	0.4528	0.94 (0.92-0.97)	1.99e-06				9	126112812	rs10760280	0.6587	T/C	0.570576			0.99 (0.97-1.02)	0.701706	0.96 (0.95-0.98)	8.45e-05	Y	0.00095		Metabochip
4	95109078	rs1509946	T/G	0.4776	0.94 (0.92-0.96)	4.16e-07				4	95012684	rs1904096	0.8176	C/A	0.515853			1.00 (0.94-1.07)	0.980769	0.95 (0.93-0.97)	2.17e-06	Y	9.2e-05		Metabochip
22	50435480	rs5771069	A/G	0.4837	0.94 (0.91-0.96)	1.85e-07				22	50440296	rs137848	0.9685	T/C	0.486634			0.97 (0.94-1.00)	0.024618	0.95 (0.93-0.97)	6e-08	Y	0.51		Metabochip
18	40772286	rs816750	C/G	0.5046	1.06 (1.03-1.08)	2.55e-06	1							C/G	0.535	0.0645314	0.0279437	1.07 (0.99-1.15)	0.0824326	1.06 (1.04-1.08)	3.063e-07	Y	0.62		Metabochip
20	45757655	rs4809627	T/C	0.5223	1.06 (1.03-1.08)	4.85e-06		>.8	-5					T/C	0.546	-0.00513079	0.0277955	0.99 (0.92-1.07)	0.891909	1.05 (1.03-1.08)	5.427e-06			1
7	13894939	rs7801928	T/C	0.5413	1.06 (1.04-1.09)	1.29e-06				7	13894276	rs1019029	0.6639	G/A	0.47863			1.02 (0.99-1.05)	0.203262	1.05 (1.03-1.07)	5.56e-06	Y	0.00014		Metabochip
2	65642097	rs6731993	A/T	0.6107	1.07 (1.04-1.09)	2.6e-07				2	65627406	rs2661796	0.5952	T/C	0.57565			1.00 (0.97-1.03)	0.839723	1.04 (1.02-1.06)	0.000133
5	112823768	rs1057827	T/C	0.651	1.06 (1.04-1.09)	2.99e-06				5	112809728	rs367943	1	C/T	0.660076			1.03 (1.00-1.07)	0.029894	1.05 (1.03-1.07)	6.07e-07
3	73633701	rs9847947	C/G	0.7371	1.07 (1.04-1.1)	1.69e-06		>.4	-6					C/G	0.741	-0.0188887	0.0312596	0.98 (0.90-1.07)	0.653882	1.06 (1.03-1.09)	1.47e-05			0.4
3	31176875	rs1625526	A/G	0.7496	1.07 (1.04-1.1)	1.11e-06	1							A/G	0.742	0.010639	0.0315491	1.01 (0.93-1.10)	0.800416	1.06 (1.04-1.09)	5.159e-06	Y	0.043		Metabochip
3	114913508	rs6438234	A/G	0.763	0.93 (0.91-0.96)	1.79e-06				3	114913508	rs6438234	1	A/G	0.746544			0.97 (0.94-1.01)	0.115228	0.95 (0.93-0.97)	3.41e-06	Y	0.004		Metabochip
12	77398721	rs17815608	A/T	0.8276	1.08 (1.05-1.12)	6.2e-06	1							A/T	0.839	0.0365097	0.0396256	1.04 (0.93-1.15)	0.492968	1.08 (1.04-1.11)	3.035e-06	Y	0.043		Metabochip
6	148963919	rs150268806	T/C	0.8292	0.93 (0.9-0.96)	3.93e-06		1						T/C	0.829	0.0726273	0.0376473	1.08 (0.98-1.18)	0.140555	0.94 (0.92-0.97)	0.0002042			0.8
8	82343438	rs182719694	A/G	0.8546	1.1 (1.06-1.14)	3.07e-07		>.6	-6					A/G	0.855	-0.0577305	0.0409834	0.94 (0.85-1.05)	0.295098	1.08 (1.05-1.12)	5.827e-06			0.8
7	121954105	rs62476011	T/C	0.8628	0.92 (0.89-0.95)	4.28e-06				7	122017812	rs1859351	0.8324	C/T	0.843276			0.98 (0.94-1.02)	0.297081	0.95 (0.92-0.97)	3.72e-05
1	88416590	rs6691335	T/C	0.9016	0.9 (0.87-0.94)	2.34e-06	1							T/C	0.896	0.0287822	0.0522557	1.03 (0.90-1.18)	0.67429	0.91 (0.88-0.94)	5.392e-07	Y	0.086		Metabochip
8	105560821	rs13268287	A/G	0.929	1.13 (1.07-1.19)	7.37e-06		>.4	-4					A/G	0.92	0.128464	0.0569331	1.14 (0.98-1.32)	0.0834462	1.13 (1.08-1.19)	1.382e-06			0.6
5	142172314	rs80020232	T/G	0.9819	0.58 (0.46-0.73)	6.41e-06		>.6	-3					T/G	0.982	-0.0837228	0.293157	1.012(0.85-1.21)	0.89	0.83 (0.72-0.95)	0.009333			0.8		0.99
19	22530857	rs191030109	T/C	0.9984	0.38 (0.25-0.57)	3.17e-06		<.2	-3					T/C	0.998	-0.240553	0.285123	0.99 (0.84-1.17)	0.95	0.87 (0.75-1.01)	0.071184			0.2		0.87
* - Stage 2 SNPs available on Metabochip are reported by their position and rsID. Other 22 variants were either directly available in the InterAct and GERA GWAS, or proxies were used in GERA as follows: for rs187357831 variant rs185032206 (r2=0.75), for rs3893328 variant rs75830455 (r2=0.53), for rs80020232 variant rs71587235 (r2=1.0), for rs191030109 variant rs146989164 (r2=0.60), for rs62530366…

## Sheet: ST7
Supplementary Table 7. T2D susceptibility loci with multiple distinct locus-wide significant (p<10-5) signals of association from approximate conditional analysis in GCTA, with UK10K population as LD reference.
Locus	LD window (HG 19)	Index SNP	Position, chr:bp (HG19)	EA/NEA	EAF	OR (95% CI)	P-value	Rationale for inclusion in this table
ANKRD55 #	55763405-55829497	rs173964	5:55809465*	G/A	0.74	1.07 (1.04-1.10)	3.539e-07	Distinct signal
ANKRD55	55828636-55882435	rs9687833	5:55861601	A/G	0.19	1.11 (1.08-1.14)	2.547e-11	Lead SNP from discovery meta-analysis; LD with previously reported in Morris et al. (2012) rs459193 (chr5:55806751, P-value=6.0E-09) r2=0.0286
DGKB	14772511-14936998	rs10276674	7:14922007*	C/T	0.2	1.09 (1.05-1.12)	8.766e-08	Distinct signal
DGKB	15016017-15066771	rs10238625	7:15054232	A/G	0.54	1.07 (1.05-1.10)	1.769e-08	Lead SNP from discovery meta-analysis; LD with previously reported in Gaulton et al. (2015) rs1974620 (chr7:15065467, P-value=1.0E-09) r2=0.8231
CDKN2A/B	21953137-22125913	rs10965223	9:22067004*	A/G	0.59	1.06 (1.03-1.08)	2.806e-06	Distinct signal
CDKN2A/B	22127613-22139220	rs10965248	9:22132878	T/C	0.82	1.16 (1.13-1.20)	4.74e-28	Lead SNP from discovery meta-analysis; LD with previously reported in Gaulton et al. (2015) rs10811660 and rs10757283 (chr9:22134068 and chr9:22134172, P-value=1.1E-61 and 3.6E-26) r2=0.9655 and 0.2614
CDKN2A/B	22128180-22138762	rs10757282	9:22133984*	C/T	0.44	1.09 (1.06-1.11)	3.732e-14	Distinct signal
KCNQ1	2646320-2686716	rs756852	11:2663891*	G/A	0.6	1.07 (1.04-1.10)	2.129e-06	Distinct signal
KCNQ1	2685864-2739180	rs231360	11:2692249*	T/C	0.41	1.06 (1.04-1.09)	1.36e-06	Distinct signal
KCNQ1	2821065-2859221	rs233449	11:2843803*	G/A	0.73	1.12 (1.09-1.15)	9.615e-17	Distinct signal
KCNQ1	2821065-2933605	rs2237897	11:2858546	C/T	0.95	1.31 (1.24-1.39)	3.769e-20	Lead SNP from discovery meta-analysis; LD with previously reported in Gaulton et al. (2015) rs2237895 (chr11:2857194, P-value=5.3E-10) r2=0.0354
KCNQ1	2895800-2916715	rs191294997	11:2906165*	G/A	0.14	1.15 (1.11-1.19)	6.424e-15	Distinct signal
KCNQ1	2895800-2920666	rs441613	11:2910191*	C/T	0.63	1.07 (1.05-1.10)	6.722e-11	Distinct signal
CCND2 #	4278090-4318974	rs11063018	12:4288001*	C/T	0.19	1.09 (1.05-1.13)	2.696e-07	Distinct signal; r2 with the other distinct signal rs188827514, r2=0.0012, and the lead SNP rs4238013, r2=0.0006.
CCND2	4156529-4360225	rs188827514	12:4291596*	A/G	0.994	1.70 (1.37-2.11)	1.244e-06	Distinct signal; LD with previously reported in Steinthorsdottir et al. (2014) rs76895963 (chr12:4275678, P-value=5E-21) r2=0.07; r2 with the other distinct signal rs11063018, r2=0.0012, and the lead SNP rs4238013, r2=0.0114.
CCND2	4349995-4376494	rs4238013	12:4376089	C/T	0.2	1.11 (1.08-1.15)	2.943e-10	Lead SNP from discovery meta-analysis; LD with previously reported in Morris et al. (2012) rs11063069 (chr12:4374373, P-value=3.3E-07) r2=0.957
HNF4A	42847440-43020568	rs12625671	20:42994812*	C/T	0.11	1.10 (1.05-1.14)	2.927e-06	Distinct signal
HNF4A	42995665-43058096	rs1800961	20:43042364	T/C	0.04	1.18 (1.10-1.26)	1.662e-06	Lead SNP from discovery meta-analysis; previously reported in Gaulton et al. (2015) ( P-value=2.3E-09)
TP53INP1	95734714-96119707	rs4734285	8:95882365	T/C	0.62	1.05 (1.03-1.08)	8.944e-05	Lead SNP from discovery meta-analysis; LD with previously reported in Morris et al. (2012) rs7845219 and rs896854 (chr8:95937502 and ch8:95960511, P=4.6E-06 and 2.1E-05) r2=0.5225 and 0.483
TP53INP1**	95734714-96119707	rs11786613	8:95957984*	C/A	0.03	1.19 (1.10-1.28)	1.203e-05	Distinct signal
#novel distinct signal
*additional distinct signal
** signal did not reach locus-wide significance (p<10-5) but was selected for follow-up because of its low frequency and the fact that it is not in LD with previously reported signals for this locus

## Sheet: ST8
Supplementary Table 8. Effects of 13 novel loci on T2D risk and respective heterogeneity estimates reported in the trans-ancestry meta-analysis (Mahajan et al., Nat Genet,2014), including European, East and South Asian, and Mexican American groups.
DIAGRAM 1000G results							Mahajan et al. results
rsid	locus	chr:position	EA/NEA	EAF	OR (95% CI)	P-value	rsid	r2 with DIAGRAM variant	EA/NEA	EAF	OR (95% CI)	P-value	N	Effect direction	P-value for heterogeneity
rs635634	ABO	9:136155000	T/C	0.18	1.08 (1.05, 1.12)	3.59x10-7	rs495828	0.84	T/G	0.21	1.05 (1.02, 1.08)	0.0029	104492	++++	0.75
rs60780116	ACSL1	4:185708807	T/C	0.84	1.09 (1.06, 1.13)	7.38x10-8	rs4862419	0.9	G/A	0.19	1.04 (1, 1.08)	0.029	99725	+-+-	0.02
rs2925979	CMIP	16:81534790	T/C	0.3	1.08 (1.05, 1.1)	2.72x10-8	rs2925979	1	T/C	0.33	1.05 (1.02, 1.08)	0.00072	98715	++++	0.21
rs79349575	GIP	17:46967038	A/T	0.51	1.07 (1.04, 1.09)	2.61x10-7	rs318095	0.83	C/T	0.46	1.03 (1.01, 1.06)	0.014	104574	--++	0.02
rs78761021	GLP2R	17:9780387	G/A	0.34	1.07 (1.05, 1.1)	5.49x10-8	rs17810279	0.87	G/T	0.71	1.05 (1.01, 1.08)	0.0088	93531	---+	0.05
rs9271774	HLA-DQA1	6:32594309	C/A	0.74	1.1 (1.06, 1.14)	3.30x10-7	rs3129768	0.79	T/G	0.76	1.06 (1.03, 1.1)	0.00028	98814	-++-	0.02
rs1061810	HSD17B12	11:43877934	A/C	0.28	1.08 (1.05, 1.11)	5.29x10-9	rs1518814	0.79	A/T	0.31	1.04 (1.01, 1.06)	0.0085	106184	+++-	0.18
rs111669836	MAP3K11	11:65364385	A/T	0.25	1.07 (1.04, 1.1)	7.43x10-7	rs11227234	0.97	T/G	0.23	1.05 (1.02, 1.09)	0.0015	103644	++++	0.48
rs1182436	MNX1	7:157027753	C/T	0.8	1.08 (1.05, 1.12)	8.30x10-7	rs1003373	0.73	G/C	0.22	1.08 (1.04, 1.12)	5.6e-05	110083	----	0.15
rs10146997	NRXN3	14:79945162	G/A	0.21	1.07 (1.04, 1.1)	4.59x10-6	rs7156625	1	A/G	0.21	1.06 (1.02, 1.1)	0.0027	87218	++++	0.88
rs2292626	PLEKHA1	10:124186714	C/T	0.5	1.09 (1.06, 1.11)	1.75x10-12	rs10510110	1	T/C	0.5	1.06 (1.03, 1.08)	6.3e-06	110201	++++	0.05
rs6918311	SLC35D3	6:137287702	A/G	0.53	1.07 (1.04, 1.1)	6.67x10-7	rs6937795	0.92	A/C	0.52	1.06 (1.03, 1.09)	4.5e-06	102451	++++	0.46
rs7224685	ZZEF1	17:4014384	T/G	0.3	1.07 (1.04, 1.1)	2.00x10-7	rs9892466	0.84	A/T	0.31	1.03 (1, 1.05)	0.062	110126	++-+	0.31

## Sheet: ST9
Supplementary Table 9. Credible set analyses for the replicated novel and established 95 fine-mapped signals (pstage1<5x10-4) using all SNVs captured in 1000G imputation or restricting to SNVs present in HapMap.
										Credible set analysis on all SNVS captured in 1000G results						credible set analysis restricted to SNVs present in HapMap
g1k_lead_rsid	chr:pos_b37	locus	chr	pos_b37	ld_window_start	ld_window_end	ld_window_size	fm_group	totalsamplesize	Posterior probability	Cumulative post probability of top 3 SNVs	N SNPs in 99% credible set	99% credible window start	99% credible window end	Window size	Lead SNV in locus	MAF	OR	pvalue	Posterior probability	Cumulative post probability of top 3 SNVs	N SNPs in 99% credible set	Of which, present in 1000G credible set	Proportion in 1000G credible set	99% credible window start	99% credible window end	Window size	Difference in Window size (1000G - HapMap)	Difference in N SNPs	Cluster*
rs3768321	1:40035928	MACF1	1	40035928	39550608	40089945	539337	1	158184	0.0428204	0.0755593	251	39551488	40087764	536276	1:39797055	0.2269	0.9337	2.17e-06	0.0887529	0.231852	77	70	90.9091	39569571	40064961	495390	40886	174	insulin resistance
rs12031920	1:51109269	FAF1	1	51109269	50807429	51781605	974176	1	158184	0.0400563	0.055742	1903	50809304	51779358	970054	1:50920161	0.0961	0.932487	0.0007567	0.0292063	0.0859805	228	137	60.0877	50815783	51769286	953503	16551	1675	unclassified
rs406767	1:120554048	NOTCH2	1	120554048	120350032	120647997	297965	1	136187	0.258512	0.505448	73	120436751	120571561	134810	1:120513117	0.1308	0.922194	8.73e-06	0.0797324	0.21095	41	40	97.561	120437718	120529750	92032	42778	32	unclassified
rs340874	1:214159256	PROX1	1	214159256	214042423	214241212	198789	1	158184	0.341917	0.518374	21	214145389	214163675	18286	1:214159256	0.4498	0.934261	3.38e-08	0.527749	0.80011	8	8	100	214145389	214163675	18286	0	13	insulin secretion group 3
rs6757251	2:43734847	THADA	2	43734847	43449385	43909051	459666	3	158186	0.0156925	0.0458472	162	43469615	43764825	295210	2:43734847	0.0989	0.877375	2.62e-10	0.0329037	0.0961314	72	71	98.6111	43586287	43761299	175012	120198	90	insulin secretion group 3
rs10193447	2:60552476	BCL11A	2	60552476	60528052	60602892	74840	1	158186	0.260875	0.538265	26	60533913	60594228	60315	2:60579988	0.439	0.933607	1.7e-08	0.366828	0.699153	15	14	93.3333	60533913	60592027	58114	2201	11	unclassified
rs1563575	2:161131694	RBMS1	2	161131694	161077823	161395403	317580	1	158186	0.081966	0.146952	88	161087411	161344062	256651	2:161131694	0.258	1.07165	6.71e-07	0.142835	0.25608	41	41	100	161087411	161275851	188440	68211	47	unclassified
rs2972156	2:227117778	IRS1	2	227117778	226897519	227199263	301744	1	158186	0.175824	0.262622	85	227047414	227181683	134269	2:227083411	0.366	0.930159	7.59e-09	0.0890412	0.231789	45	42	93.3333	227047414	227181683	134269	0	40	insulin resistance
rs11712037	3:12344730	PPARG	3	12344730	12026672	12477816	451144	1	158185	0.138699	0.371712	42	12265462	12396955	131493	3:12369401	0.1251	0.876779	1.41e-12	0.193206	0.553613	16	16	100	12275447	12396955	121508	9985	26	insulin resistance
rs35352848	3:23455582	UBE2E2	3	23455582	23155165	23648116	492951	1	158185	0.395523	0.86411	65	23187407	23568225	380818	3:23457080	0.2229	1.08643	1.56e-08	0.79889	0.953711	13	13	100	23187407	23457080	269673	111145	52	unclassified
rs7428936	3:64710850	ADAMTS9	3	64710850	64696007	64733440	37433	1	158185	0.16304	0.393839	14	64699445	64730121	30676	3:64710850	0.4095	1.07305	1.01e-08	0.26439	0.63866	8	7	87.5	64699445	64730121	30676	0	6	unclassified
rs11708067	3:123065778	ADCY5	3	123065778	122894836	123137791	242955	1	152598	0.262625	0.691116	11	123054770	123093887	39117	3:123065778	0.2129	1.11617	8.83e-13	0.62446	0.977589	5	4	80	123065778	123096820	31042	8075	6	insulin secretion group 2
rs4402960	3:185511687	IGF2BP2	3	185511687	185417641	185550317	132676	1	152598	0.286863	0.726829	30	185497635	185530290	32655	3:185511687	0.3056	1.14844	2.66e-25	0.298686	0.756785	9	9	100	185497635	185529080	31445	1210	21	insulin secretion group 3
rs9820223	3:186663868	ST6GAL1	3	186663868	186606581	186682612	76031	1	158185	0.377464	0.450308	247	186606741	186682612	75871	3:186665645	0.4643	1.0476	0.0001764	0.165196	0.44886	39	36	92.3077	186613327	186682612	69285	6586	208	unclassified
rs6777684	3:187741842	LPP	3	187741842	187677380	187757268	79888	1	158185	0.230203	0.567579	324	187677977	187757268	79291	3:187740523	0.3942	0.951991	7.33e-05	0.581837	0.658487	93	86	92.4731	187677977	187757268	79291	0	231	unclassified
rs1531583	4:744972	MAEA	4	744972	510875	2266100	1755225	1	144210	0.067732	0.160913	2719	510985	2265824	1754839	4:744972	0.054	1.14958	3.88e-06	0.875203	0.896875	341	242	70.9677	510875	2244865	1733990	20849	2378	unclassified
rs3821943	4:6299940	WFS1	4	6299940	6263996	6328507	64511	1	158185	0.672982	0.747413	87	6263996	6321396	57400	4:6299940	0.4649	1.10473	4.24e-16	0.844759	0.91767	29	29	100	6271043	6321396	50353	7047	58	unclassified
rs7660590	4:153397823	TMEM154	4	153397823	153239288	153522691	283403	1	158185	0.0309676	0.0821134	523	153241587	153520765	279178	4:153397823	0.2838	0.947432	6.8e-05	0.0865612	0.196071	53	53	100	153252061	153520475	268414	10764	470	unclassified
rs60780116	4:185708807	ACSL1 #	4	185708807	185562197	185755328	193131	1	158185	0.190783	0.318527	67	185684247	185732558	48311	4:185708595	0.1706	0.916494	1.72e-07	0.382598	0.765727	7	7	100	185708595	185721370	12775	35536	60	unclassified
rs11747901	5:53301561	ARL15	5	53301561	53241952	53395798	153846	1	158186	0.0511972	0.113975	233	53243352	53394972	151620	5:53304725	0.2461	1.06173	1.71e-05	0.0789636	0.226447	39	39	100	53271420	53394938	123518	28102	194	insulin resistance
rs173964	5:55809465	ANKRD55	5	55809465	55763405	55829497	66092	2	158186	0.147202	0.410596	20	55794632	55816081	21449	5:55806751	0.2567	0.931955	4.99e-07	0.440727	0.635735	8	8	100	55796319	55816081	19762	1687	12	insulin resistance
rs9687833	5:55861601	ANKRD55	5	55861601	55828636	55882435	53799	3	158186	0.140856	0.420318	10	55856375	55861894	5519	5:55861359	0.1865	1.10893	3.12e-11	0.202724	0.584073	7	7	100	55856375	55861894	5519	0	3	insulin resistance
rs6453287	5:76453765	ZBED3	5	76453765	76421301	76474068	52767	1	158186	0.297335	0.671049	39	76424949	76474068	49119	5:76424949	0.2861	0.940823	1.43e-05	0.378308	0.845659	19	19	100	76424949	76462153	37204	11915	20	unclassified
rs74944275	5:102726073	PAM	5	102726073	101624336	102827276	1202940	1	158186	0.129021	0.175073	2842	101624383	102826777	1202394	5:101813748	0.3062	1.06025	1.28e-05	0.0845547	0.194979	483	483	100	101624393	102754950	1130557	71837	2359	missing data (to delete)
rs6923241	6:7258847	SSR1/RREB1	6	7258847	7161471	7328751	167280	1	158185	0.312517	0.531842	315	7166829	7327634	160805	6:7258617	0.2937	0.937911	2.86e-06	0.608158	0.864468	27	27	100	7195684	7326681	130997	29808	288	unclassified
rs7451008	6:20673880	CDKAL1	6	20673880	20526229	20841800	315571	1	158185	0.628163	0.816624	6	20673880	20703952	30072	6:20688121	0.2588	1.18756	1.84e-36	0.466123	0.99546	3	3	100	20686573	20703952	17379	12693	3	insulin secretion group 3
rs115321690	6:31116526	POU5F1/TCF19	6	31116526	30955929	31271076	315147	1	152598	0.0758189	0.190604	326	30987987	31264461	276474	6:31114745	0.4654	0.939977	7.56e-07	0.11947	0.336048	75	75	100	31059462	31264461	204999	71475	251	unclassified
rs9271774	6:32594309	HLA-DQA1 #	6	32594309	32344376	32665916	321540	3	135283	0.599884	0.754566	41	32524684	32604969	80285	6:32594328	0.2443	1.11299	2.16e-10	0.999999	1	1	1	100	32594328	32594328	0	80285	40	unclassified
rs11759026	6:126792095	CENPW	6	126792095	126551280	127161066	609786	1	158185	0.352802	0.459954	125	126657472	127070234	412762	6:126752798	0.4491	1.07541	4.36e-09	0.105832	0.258975	83	79	95.1807	126659043	127070234	411191	1571	42	unclassified
rs6918311	6:137287702	SLC35D3/NHEG1/IL20RA #	6	137287702	137277890	137305466	27576	1	143306	0.209208	0.368123	40	137287076	137305466	18390	6:137301581	0.4753	0.936786	1.82e-06	0.191302	0.528282	16	16	100	137291281	137305466	14185	4205	24	unclassified
rs10276674	7:14922007	DGKB	7	14922007	14772511	14936998	164487	2	158184	0.541929	0.93967	7	14862102	14923907	61805	7:14922007	0.1981	0.919921	8.77e-08	0.678391	0.986153	4	4	100	14882428	14923907	41479	20326	3	unclassified
rs10238625	7:15054232	DGKB	7	15054232	15016017	15066771	50754	3	158184	0.0465839	0.136339	59	15047280	15065612	18332	7:15054232	0.4603	1.06993	1.77e-08	0.0786476	0.224346	32	32	100	15047280	15065612	18332	0	27	insulin secretion group 1
rs1635852	7:28189411	JAZF1	7	28189411	28138193	28260312	122119	1	158184	0.216901	0.507538	11	28172732	28200097	27365	7:28189411	0.4984	1.09625	3.04e-14	0.299899	0.70175	6	6	100	28180556	28196413	15857	11508	5	unclassified
rs878521	7:44255643	GCK	7	44255643	44222003	44266570	44567	3	158184	0.105892	0.251954	103	44222077	44266184	44107	7:44231886	0.1579	0.943332	0.0004731	0.185868	0.521791	13	13	100	44223721	44248828	25107	19000	90	insulin secretion group 1
rs10954284	7:130463758	KLF14	7	130463758	130422934	130468190	45256	1	152597	0.0479632	0.122544	71	130422934	130468190	45256	7:130463758	0.4983	0.947716	1.82e-05	0.129262	0.284744	24	24	100	130429186	130468190	39004	6252	47	insulin resistance
rs1182436	7:157027753	MNX1 #	7	157027753	156916327	157090313	173986	1	156108	0.220463	0.373766	220	156920930	157089155	168225	7:157031407	0.1703	0.925242	2.24e-06	0.377931	0.603343	40	40	100	156930550	157079517	148967	19258	180	unclassified
rs516946	8:41519248	ANK1	8	41519248	41393333	41576746	183413	1	158185	0.114723	0.273797	44	41426157	41537318	111161	8:41519248	0.225	0.929787	8.59e-07	0.257691	0.574445	11	11	100	41462898	41533514	70616	40545	33	unclassified
rs4734285	8:95882365	TP53INP1	8	95882365	95734714	96119707	384993	3	158185	0.03646	0.07249	988	95734719	96119643	384924	8:95888307	0.4049	0.95516	0.0001813	0.0529214	0.149697	180	180	100	95742394	96112796	370402	14522	808	unclassified
rs11786613	8:95957984	TP53INP1	8	95957984	95734714	96119707	384993	2	155750	0.531922	0.82636	829	95734714	96119643	384929	8:96109330	0.1801	1.03405	0.0263461	0.021954	0.0614747	286	113	39.5105	95734714	96117240	382526	2403	543	unclassified
rs3802177	8:118185025	SLC30A8	8	118185025	118182924	118226390	43466	1	158185	0.390012	0.743676	6	118184783	118217915	33132	8:118185025	0.3226	0.893061	1.72e-17	0.529531	0.99872	3	3	100	118184783	118185733	950	32182	3	insulin secretion group 2
rs10758593	9:4292083	GLIS3	9	4292083	4243162	4311892	68730	1	158183	0.0544915	0.140729	359	4243162	4311591	68429	9:4292083	0.4129	1.04519	0.0002919	0.126653	0.322195	123	123	100	4243162	4308270	65108	3321	236	insulin secretion group 3
rs186838848	9:8288059	PTPRD	9	8288059	7540039	8979016	1438977	1	134085	0.0316037	0.0492968	7636	7540039	8979016	1438977	9:8455942	0.1731	1.05696	0.0008435	0.0492012	0.0662201	2289	2072	90.5199	7540039	8979016	1438977	0	5347	unclassified
rs10965223	9:22067004	CDKN2A	9	22067004	21953137	22125913	172776	5	158183	0.101276	0.253545	105	21997015	22125347	128332	9:22061562	0.4049	1.05794	3.56e-06	0.15748	0.303895	55	55	100	21997872	22125347	127475	857	50	unclassified
rs10965248	9:22132878	CDKN2A/B	9	22132878	22127613	22139220	11607	5	158183	0.39367	0.703533	6	22132698	22134253	1555	9:22133284	0.1792	0.859182	1.22e-27	0.999969	1	1	1	100	22133284	22133284	0	1555	5	insulin secretion group 1
rs10757282	9:22133984	CDKN2AB	9	22133984	22128180	22138762	10582	5	152596	0.652551	0.951545	5	22133645	22134651	1006	9:22133984	0.4362	0.921439	3.73e-14	0.687012	0.999917	3	3	100	22133645	22134172	527	479	2	unclassified
rs13301067	9:81900744	TLE4	9	81900744	81881142	82012901	131759	1	158183	0.128441	0.317002	192	81881363	82012175	130812	9:81898980	0.0757	1.10583	2.37e-05	0.179097	0.447454	38	38	100	81881830	81996960	115130	15682	154	unclassified
rs9410573	9:84311800	TLE1	9	84311800	84281312	84388148	106836	1	158183	0.695448	0.948398	8	84293453	84311800	18347	9:84308948	0.3987	0.930345	5.51e-08	0.858785	0.954001	5	5	100	84294997	84308948	13951	4396	3	unclassified
rs635634	9:136155000	ABO #	9	136155000	136124190	136307408	183218	1	158183	0.176749	0.444014	40	136137065	136155000	17935	9:136154168	0.2011	0.928207	8.47e-07	0.311559	0.857786	13	13	100	136137065	136154867	17802	133	27	ABO only
rs11257659	10:12309269	CDC123/CAMK1D	10	12309269	12225552	12340293	114741	1	158186	0.312473	0.631502	15	12302357	12329652	27295	10:12307894	0.2273	1.08275	3.96e-08	0.581386	0.973282	4	4	100	12302357	12328010	25653	1642	11	insulin secretion group 3
rs10998572	10:70859204	VPS26A	10	70859204	70811235	70998001	186766	1	158186	0.0546564	0.136058	501	70811235	70997607	186372	10:70864397	0.0648	0.915578	0.0003904	0.206255	0.563759	137	115	83.9416	70811235	70997365	186130	242	364	unclassified
rs810517	10:80942620	ZMIZ1	10	80942620	80934948	81021301	86353	1	152599	0.343491	0.729222	15	80941417	80954789	13372	10:80942620	0.4854	0.915212	1.26e-12	0.393931	0.813547	11	10	90.9091	80941417	80954251	12834	538	4	body-mass index + lipids
rs11187140	10:94466910	HHEX/IDE	10	94466910	94202905	94500111	297206	3	158186	0.300652	0.524769	24	94429511	94485763	56252	10:94462882	0.4277	0.882929	3.8e-23	0.284276	0.691077	7	4	57.1429	94462882	94481917	19035	37217	17	insulin secretion group 3
rs7903146	10:114758349	TCF7L2	10	114758349	114722954	114823426	100472	5	158186	0.380249	0.999985	3	114754071	114758349	4278	10:114758349	0.2892	1.22075	0	1	1	1	1	100	114758349	114758349	0	4278	2	insulin secretion group 2
rs2292626	10:124186714	PLEKHA1/ARMS2 #	10	124186714	124061121	124236331	175210	1	158186	0.0727181	0.201889	25	124139393	124198585	59192	10:124186714	0.4962	0.91842	1.75e-12	0.0984292	0.273272	18	18	100	124139393	124198585	59192	0	7	unclassified
rs2334499	11:1696849	DUSP8	11	1696849	1683564	1716749	33185	1	158185	0.189138	0.389187	186	1683579	1716745	33166	11:1696849	0.4154	1.05075	7.27e-05	0.605148	0.851386	14	14	100	1689325	1716663	27338	5828	172	unclassified
rs756852	11:2663891	KCNQ1	11	2663891	2646320	2686716	40396	5	158185	0.705638	0.752029	45	2646517	2684780	38263	11:2677361	0.095	1.07969	0.0002048	0.218628	0.550345	12	9	75	2646320	2682676	36356	1907	33	unclassified
rs231360	11:2692249	KCNQ1	11	2692249	2685864	2739180	53316	5	158185	0.788037	0.947552	24	2689100	2730297	41197	11:2691471	0.4866	0.948281	8.14e-06	0.819995	0.945572	12	12	100	2691471	2723604	32133	9064	12	unclassified
rs233449	11:2843803	KCNQ1	11	2843803	2821065	2859221	38156	5	158185	0.478629	0.87442	8	2837723	2852886	15163	11:2843803	0.274	0.890894	9.61e-17	0.71698	0.956682	6	5	83.3333	2837625	2852529	14904	259	2	unclassified
rs2237897	11:2858546	KCNQ1	11	2858546	2821065	2933605	112540	5	158185	0.74256	0.999984	3	2858440	2858636	196	11:2858546	0.0544	0.761716	3.77e-20	0.941292	1	2	2	100	2858440	2858546	106	90	1	unclassified
rs191294997	11:2906165	KCNQ1	11	2906165	2895800	2916715	20915	5	149852	1	1	1	2906165	2906165	0	11:2897026	0.3415	1.01486	0.198102	0.154692	0.295624	18	0	0	2895800	2916459	20659	-20659	-17	unclassified
rs441613	11:2910191	KCNQ1	11	2910191	2895800	2920666	24866	5	158185	0.992593	0.999391	1	2910191	2910191	0	11:2912946	0.422	1.0645	1.64e-08	0.665355	0.998846	3	0	0	2902105	2912946	10841	-10841	-2	unclassified
rs5219	11:17409572	KCNJ11	11	17409572	17037793	17424988	387195	1	158185	0.254308	0.524314	22	17368381	17421886	53505	11:17418477	0.3804	0.937067	1.57e-07	0.288527	0.70839	9	8	88.8889	17365209	17418477	53268	237	13	unclassified
rs1061810	11:43877934	HSD17B12 #	11	43877934	43595031	43879540	284509	1	158185	0.0754961	0.196421	74	43752522	43878534	126012	11:43877934	0.2785	1.08372	5.29e-09	0.174084	0.263927	40	38	95	43752522	43877934	125412	600	34	unclassified
rs111669836	11:65364385	LTBP3/EHBP1L1/KCNK7/MAP3K11 #	11	65364385	65203561	65566816	363255	1	158185	0.0922273	0.220335	83	65217626	65532001	314375	11:65366192	0.2536	1.07015	1.29e-06	0.750491	0.928943	23	12	52.1739	65220749	65485218	264469	49906	60	body-mass index + lipids
rs76550717	11:72428172	ARAP1 (CENTD2)	11	72428172	72323881	72881636	557755	1	158185	0.113504	0.295849	26	72419514	72851463	431949	11:72432985	0.1693	0.909464	5.25e-09	0.429525	0.887005	8	7	87.5	72432985	72851463	418478	13471	18	proinsulin
rs10830963	11:92708710	MTNR1B	11	92708710	92667047	92727874	60827	1	152598	0.339581	0.449869	56	92667730	92725321	57591	11:92708710	0.2661	0.92626	1.66e-07	0.651194	0.802057	18	18	100	92667730	92725321	57591	0	38	hyperglycemic
rs11063018	12:4288001	CCND2	12	4288001	4278090	4318974	40884	5	158183	0.707044	0.802489	20	4288001	4316171	28170	12:4300172	0.179	0.928918	3e-06	0.292061	0.52228	15	12	80	4291829	4316081	24252	3918	5	unclassified
rs188827514	12:4291596	CCND2	12	4291596	4156529	4360225	203696	5	138114	0.275101	0.390156	102	4158184	4358704	200520	12:4241690	0.0249	1.18064	3.85e-05	0.420079	0.888291	50	23	46	4158184	4359131	200947	-427	52	unclassified
rs4238013	12:4376089	CCND2	12	4376089	4349995	4376494	26499	5	158183	0.384345	0.999997	3	4362909	4376089	13180	12:4374373	0.2013	0.900015	3.11e-10	0.999998	0.999999	1	1	100	4374373	4374373	0	13180	2	unclassified
rs7953190	12:27962719	KLHDC5	12	27962719	27845924	27974543	128619	1	158183	0.0471003	0.141301	61	27919145	27965150	46005	12:27962260	0.197	0.924687	4.28e-07	0.151716	0.422643	19	19	100	27919491	27965150	45659	346	42	unclassified
rs2258238	12:66221060	HMGA2	12	66221060	66164800	66385280	220480	1	158183	0.174418	0.349885	107	66165471	66383320	217849	12:66215292	0.0928	0.895207	2.84e-07	0.277051	0.59124	36	36	100	66165471	66383320	217849	0	71	unclassified
rs6581998	12:71656723	TSPAN8/LGR5	12	71656723	71412932	71667270	254338	1	158183	0.139455	0.330529	536	71413705	71666186	252481	12:71656723	0.2707	0.942801	1.23e-05	0.197287	0.4676	104	104	100	71421552	71666186	244634	7847	432	unclassified
rs56348580	12:121432117	HNF1A (TCF1)	12	121432117	121378877	121490605	111728	1	158183	0.146053	0.340651	16	121410168	121471931	61763	12:121426901	0.2301	0.923948	7.23e-08	0.393262	0.996213	3	3	100	121426901	121471931	45030	16733	13	unclassified
rs2851437	12:123653592	MPHOSPH9	12	123653592	123403710	123913697	509987	1	158183	0.195879	0.330975	550	123408818	123913697	504879	12:123593382	0.2016	0.940635	6.49e-05	0.0590437	0.117562	95	95	100	123447928	123825559	377631	127248	455	unclassified
rs11616380	13:80705315	SPRY2	13	80705315	80605535	80774626	169091	1	158184	0.434256	0.856961	9	80705315	80718654	13339	13:80705315	0.2852	0.914114	3.87e-11	0.595608	0.873571	7	7	100	80705315	80715893	10578	2761	2	unclassified
rs10146997	14:79945162	NRXN3 #	14	79945162	79689186	80077609	388423	1	158185	0.0815856	0.228003	537	79689186	80076724	387538	14:79945162	0.2118	0.934728	4.59e-06	0.138285	0.381248	51	51	100	79693567	80075891	382324	5214	486	body-mass index + lipids
rs4774420	15:62117975	C2CD4A	15	62117975	62112283	62382611	270328	1	158185	0.256104	0.515413	46	62117975	62381413	263438	15:62117975	0.2976	0.927929	2.7e-08	0.318884	0.64176	23	23	100	62117975	62379814	261839	1599	23	insulin secretion group 1
rs952471	15:77776498	HMG20A	15	77776498	77307728	77910620	602892	1	158185	0.101802	0.257336	49	77486008	77832316	346308	15:77747190	0.2981	0.920996	4.4e-10	0.217853	0.562892	30	28	93.3333	77584498	77832316	247818	98490	19	unclassified
rs62006309	15:80411245	ZFAND6	15	80411245	80339456	80443036	103580	1	158185	0.250755	0.367278	271	80339586	80442883	103297	15:80432222	0.3538	0.955137	0.0005417	0.181968	0.41149	48	40	83.3333	80345506	80442883	97377	5920	223	unclassified
rs12595616	15:91563513	PRC1	15	91563513	91444573	91575940	131367	1	152598	0.112653	0.204329	75	91444573	91569281	124708	15:91563513	0.3668	0.937817	5.63e-07	0.237269	0.430356	27	27	100	91457220	91566862	109642	15066	48	unclassified
rs1558902	16:53803574	FTO	16	53803574	53797057	53848561	51504	1	158182	0.117044	0.332249	64	53799507	53842908	43401	16:53803574	0.4155	1.13394	4.65e-25	0.385323	0.552256	23	21	91.3043	53799507	53842908	43401	0	41	FTO only
rs8056814	16:75252327	BCAR1	16	75252327	75220009	75519917	299908	1	158182	0.572225	0.826148	13	75234872	75286484	51612	16:75242012	0.0999	1.13043	7.45e-09	0.974776	0.983985	5	1	20	75242012	75247245	5233	46379	8	unclassified
rs2925979	16:81534790	CMIP #	16	81534790	81484200	81553070	68870	1	158182	0.910121	0.993191	3	81524274	81534790	10516	16:81534790	0.2977	1.07638	2.72e-08	0.975273	0.997045	2	2	100	81524274	81534790	10516	0	1	body-mass index + lipids
rs7224685	17:4014384	ZZEF1 #	17	4014384	3868738	4289374	420636	1	158182	0.165568	0.328766	307	3880546	4287311	406765	17:3985864	0.3123	1.06769	3.89e-07	0.272393	0.588198	109	107	98.1651	3881293	4278835	397542	9223	198	unclassified
rs78761021	17:9780387	GLP2R #	17	9780387	9751738	9807099	55361	1	158182	0.0447324	0.120517	87	9765514	9806678	41164	17:9766753	0.3197	0.932953	7.95e-08	0.091852	0.251646	37	36	97.2973	9765514	9805510	39996	1168	50	unclassified
rs757209	17:36102833	HNF1B (TCF2)	17	36102833	36087874	36111755	23881	1	149849	0.293256	0.587576	13	36097775	36104121	6346	17:36098040	0.4798	0.931648	4.15e-08	0.705868	0.955316	5	1	20	36096300	36106313	10013	-3667	8	missing data (to delete)
rs79349575	17:46967038	GIP/ATP5G1 #	17	46967038	46830145	47047868	217723	1	158182	0.11474	0.216883	172	46883545	47047868	164323	17:47018025	0.4631	0.944216	2.68e-06	0.0688056	0.15935	38	35	92.1053	46905056	47047868	142812	21511	134	unclassified
rs7234111	18:7067652	LAMA1	18	7067652	7040983	7086310	45327	1	158184	0.0876644	0.227153	28	7062395	7082908	20513	18:7067652	0.364	0.939225	7.71e-07	0.141797	0.334737	19	19	100	7062457	7082908	20451	62	9	unclassified
rs1942880	18:57793209	MC4R	18	57793209	57728779	57913965	185186	4	152597	0.0293994	0.0845823	168	57730948	57913965	183017	18:57793209	0.3323	1.06539	1.25e-06	0.0528543	0.149023	88	88	100	57732689	57913434	180745	2272	80	body-mass index + lipids
rs58489806	19:19456917	CILP2	19	19456917	19260466	19800467	540001	1	158186	0.0777201	0.159832	1358	19260466	19800467	540001	19:19407718	0.0762	0.916219	0.0001995	0.243916	0.414908	171	155	90.6433	19260466	19800467	540001	0	1187	insulin resistance + lipids 1
rs429358	19:45411941	APOE	19	45411941	45382034	45430417	48383	1	152543	0.842023	0.986014	4	45411941	45422946	11005	19:45422946	0.1927	1.11527	1.53e-09	0.965688	0.999992	2	1	50	45392254	45422946	30692	-19687	2	body-mass index + lipids
rs55864746	19:46160246	GIPR	19	46160246	46147527	46288706	141179	4	158186	0.0695486	0.191618	30	46148386	46178661	30275	19:46158156	0.3048	0.935557	9.04e-09	0.292703	0.678156	7	7	100	46148386	46159609	11223	19052	23	body-mass index + lipids
rs12625671	20:42994812	HNF4A	20	42994812	42847440	43020568	173128	3	158182	0.350914	0.7427	136	42847479	43016948	169469	20:42999630	0.3239	0.945907	3.56e-05	0.766861	0.853186	87	15	17.2414	42849300	43020103	170803	-1334	49	unclassified
rs1800961	20:43042364	HNF4A	20	43042364	42995665	43058096	62431	2	152595	0.99322	0.993623	1	43042364	43042364	0	20:43042364	0.0374	1.17787	1.66e-06	0.998814	0.999137	1	1	100	43042364	43042364	0	0	0	unclassified
rs2023681	22:30599562	MTMR3/HORMAD2	22	30599562	30108660	30662763	554103	1	158183	0.14401	0.173205	153	30135928	30609554	473626	22:30599562	0.1122	0.884617	3.94e-09	0.335238	0.384792	53	51	96.2264	30138232	30600065	461833	11793	100	unclassified
* - Assignment to loci clusters based on the hierarchical clustering analysis (Online Methods)
																												4396	34

## Sheet: ST10
Supplementary Table 10. SNVs included in each of the credible sets.
Index SNV (Chrpos_b37)	SNV (Chrpos_b37)	post_prob	p_value	N_SNPs_in_99%_credible_set
1:120554048	1:120554048	0.258512	7.51e-07	73
1:120554048	1:120554134	0.184015	1.07e-06	73
1:120554048	1:120571561	0.0629211	3.61e-06	73
1:120554048	1:120552215	0.0319364	6.97e-06	73
1:120554048	1:120554499	0.028254	8.58e-06	73
1:120554048	1:120513117	0.0192722	8.73e-06	73
1:120554048	1:120526982	0.0182766	9.37e-06	73
1:120554048	1:120525554	0.0149992	1.113e-05	73
1:120554048	1:120528932	0.0140029	1.255e-05	73
1:120554048	1:120508803	0.01344	1.234e-05	73
1:120554048	1:120570448	0.0133517	1.701e-05	73
1:120554048	1:120532209	0.0118269	1.65e-05	73
1:120554048	1:120495934	0.0117405	1.43e-05	73
1:120554048	1:120567801	0.0114657	2.305e-05	73
1:120554048	1:120478285	0.01039	1.616e-05	73
1:120554048	1:120439109	0.0102769	1.848e-05	73
1:120554048	1:120498086	0.009888	1.656e-05	73
1:120554048	1:120505996	0.00965931	1.742e-05	73
1:120554048	1:120489057	0.00943619	1.756e-05	73
1:120554048	1:120466108	0.00923628	1.794e-05	73
1:120554048	1:120474507	0.00860966	1.934e-05	73
1:120554048	1:120529750	0.00789877	2.358e-05	73
1:120554048	1:120463230	0.00766294	2.146e-05	73
1:120554048	1:120485517	0.00747712	2.259e-05	73
1:120554048	1:120531133	0.00727849	2.638e-05	73
1:120554048	1:120443702	0.00698702	2.434e-05	73
1:120554048	1:120477998	0.00698492	2.604e-05	73
1:120554048	1:120513548	0.00682255	2.664e-05	73
1:120554048	1:120441998	0.00667013	2.485e-05	73
1:120554048	1:120505803	0.00651599	2.735e-05	73
1:120554048	1:120523902	0.00639589	2.845e-05	73
1:120554048	1:120516618	0.0061235	3.061e-05	73
1:120554048	1:120519618	0.00574118	3.285e-05	73
1:120554048	1:120480709	0.00561942	3.337e-05	73
1:120554048	1:120447463	0.00542107	3.398e-05	73
1:120554048	1:120492200	0.00505889	3.638e-05	73
1:120554048	1:120496119	0.00505032	3.822e-05	73
1:120554048	1:120496127	0.00505032	3.822e-05	73
1:120554048	1:120495506	0.00505032	3.82e-05	73
1:120554048	1:120448749	0.00495624	3.413e-05	73
1:120554048	1:120472507	0.00494401	3.761e-05	73
1:120554048	1:120471857	0.00484007	3.82e-05	73
1:120554048	1:120473066	0.00473844	3.96e-05	73
1:120554048	1:120474178	0.00455223	4.257e-05	73
1:120554048	1:120471224	0.00454191	4.146e-05	73
1:120554048	1:120443540	0.00453156	4.09e-05	73
1:120554048	1:120440029	0.00434308	4.197e-05	73
1:120554048	1:120461253	0.00426314	4.304e-05	73
1:120554048	1:120473425	0.00411063	4.435e-05	73
1:120554048	1:120455441	0.00403565	4.587e-05	73
1:120554048	1:120484421	0.00396974	4.542e-05	73
1:120554048	1:120451352	0.00385828	4.838e-05	73
1:120554048	1:120506786	0.00379744	4.788e-05	73
1:120554048	1:120437884	0.00374621	4.91e-05	73
1:120554048	1:120505532	0.00363305	5.086e-05	73
1:120554048	1:120464165	0.00362032	5.088e-05	73
1:120554048	1:120458004	0.00360485	5.061e-05	73
1:120554048	1:120448805	0.00318366	5.522e-05	73
1:120554048	1:120544331	0.00317962	7.659e-05	73
1:120554048	1:120446063	0.003169	5.941e-05	73
1:120554048	1:120492164	0.00302255	6.259e-05	73
1:120554048	1:120499574	0.00291614	6.817e-05	73
1:120554048	1:120499573	0.00291614	6.82e-05	73
1:120554048	1:120473725	0.0028315	7.775e-05	73
1:120554048	1:120455310	0.00257719	7.871e-05	73
1:120554048	1:120451190	0.00247362	8.275e-05	73
1:120554048	1:120455586	0.00247362	8.177e-05	73
1:120554048	1:120520715	0.00233341	8.671e-05	73
1:120554048	1:120436751	0.00210539	0.0001245	73
1:120554048	1:120515284	0.00192398	0.0001448	73
1:120554048	1:120437718	0.0016417	0.0001188	73
1:120554048	1:120508524	0.00136141	0.0001473	73
1:120554048	1:120517959	0.00116732	0.0001882	73
1:214159256	1:214159256	0.341917	3.38e-08	21
1:214159256	1:214163675	0.0949525	1.33e-07	21
1:214159256	1:214147889	0.0815043	1.38e-07	21
1:214159256	1:214162734	0.0808641	1.38e-07	21
1:214159256	1:214162573	0.0772298	1.38e-07	21
1:214159256	1:214145731	0.0762595	1.57e-07	21
1:214159256	1:214163069	0.0742687	1.72e-07	21
1:214159256	1:214156514	0.0399265	3.46e-07	21
1:214159256	1:214145706	0.0319266	3.78e-07	21
1:214159256	1:214156165	0.0178864	6.61e-07	21
1:214159256	1:214161820	0.0153522	7.66e-07	21
1:214159256	1:214157246	0.0120273	1.09e-06	21
1:214159256	1:214149028	0.00988774	1.57e-06	21
1:214159256	1:214158132	0.0074597	1.7e-06	21
1:214159256	1:214160529	0.00616094	1.97e-06	21
1:214159256	1:214160548	0.00539823	2.47e-06	21
1:214159256	1:214157049	0.0047406	2.73e-06	21
1:214159256	1:214156860	0.0047406	2.74e-06	21
1:214159256	1:214145389	0.00439333	3.03e-06	21
1:214159256	1:214148628	0.00217023	6.27e-06	21
1:214159256	1:214149061	0.00192102	6.41e-06	21
1:39835817	1:40035928	0.0428204	8.11e-07	251
1:39835817	1:39797055	0.0166349	2.17e-06	251
1:39835817	1:39848347	0.016104	2.32e-06	251
1:39835817	1:39825438	0.0146151	2.75e-06	251
1:39835817	1:39820310	0.0146151	2.7e-06	251
1:39835817	1:39814960	0.0143761	2.48e-06	251
1:39835817	1:39831768	0.0141514	2.82e-06	251
1:39835817	1:39819503	0.0141514	2.78e-06	251
1:39835817	1:39815344	0.0141514	2.8e-06	251
1:39835817	1:39816941	0.0141514	2.8e-06	251
1:39835817	1:39818052	0.0141514	2.79e-06	251
1:39835817	1:39815143	0.0141514	2.8e-06	251
1:39835817	1:39812518	0.0139235	2.63e-06	251
1:39835817	1:39837102	0.013703	2.88e-06	251
1:39835817	1:39834617	0.0132694	2.99e-06	251
1:39835817	1:39801815	0.0132694	3.06e-06	251
1:39835817	1:40000499	0.0132359	4.98e-06	251
1:39835817	1:39835817	0.0124448	3.14e-06	251
1:39835817	1:39855177	0.0124448	3.21e-06	251
1:39835817	1:39846590	0.0124448	3.2e-06	251
1:39835817	1:39842690	0.0122569	3.02e-06	251
1:39835817	1:39870793	0.0120528	3.29e-06	251
1:39835817	1:39867055	0.0120528	3.33e-06	251
1:39835817	1:39905873	0.0120528	3.33e-06	251
1:39835817	1:39885763	0.0120528	3.33e-06	251
1:39835817	1:39863215	0.0120528	3.32e-06	251
1:39835817	1:39857192	0.0116737	3.41e-06	251
1:39835817	1:39880319	0.0116737	3.39e-06	251
1:39835817	1:39881468	0.0116737	3.4e-06	251
1:39835817	1:39905588	0.011307	3.5e-06	251
1:39835817	1:39840768	0.0111447	3.65e-06	251
1:39835817	1:39757799	0.0109524	3.73e-06	251
1:39835817	1:39758634	0.0109524	3.69e-06	251
1:39835817	1:39777159	0.0107979	3.33e-06	251
1:39835817	1:39694518	0.0106094	3.8e-06	251
1:39835817	1:39833535	0.0101377	4.02e-06	251
1:39835817	1:39792369	0.00987044	3.91e-06	251
1:39835817	1:39914090	0.00964623	4.14e-06	251
1:39835817	1:39913351	0.00964623	4.14e-06	251
1:39835817	1:39770278	0.00951962	3.76e-06	251
1:39835817	1:39770227	0.00951962	3.76e-06	251
1:39835817	1:39769000	0.00951962	3.8e-06	251
1:39835817	1:39748271	0.00934591	4.32e-06	251
1:39835817	1:39762203	0.00934591	3.93e-06	251
1:39835817	1:39748662	0.00934591	4.33e-06	251
1:39835817	1:39722214	0.00934591	4.39e-06	251
1:39835817	1:39762889	0.00922552	3.95e-06	251
1:39835817	1:39766041	0.00922552	3.91e-06	251
1:39835817	1:39728647	0.00845749	4.43e-06	251
1:39835817	1:39731550	0.00823914	4.9e-06	251
1:39835817	1:39923732	0.00773811	5.43e-06	251
1:39835817	1:39713648	0.00764966	4.99e-06	251
1:39835817	1:39708703	0.00741575	5.07e-06	251
1:39835817	1:39708302	0.00741575	5.1e-06	251
1:39835817	1:39711930	0.00741575	4.97e-06	251
1:39835817	1:39710459	0.00741575	5e-06	251
1:39835817	1:39713860	0.00718933	5.2e-06	251
1:39835817	1:39688075	0.00704561	5.78e-06	251
1:39835817	1:39679402	0.00704561	5.74e-06	251
1:39835817	1:39686210	0.00704561	5.88e-06	251
1:39835817	1:39688552	0.00704561	5.76e-06	251
1:39835817	1:39688242	0.00704561	5.78e-06	251
1:39835817	1:39716902	0.00697014	5.21e-06	251
1:39835817	1:39675322	0.0066203	6.25e-06	251
1:39835817	1:39924398	0.00655254	5.48e-06	251
1:39835817	1:39618556	0.00655254	5.97e-06	251
1:39835817	1:39612557	0.00622184	6.62e-06	251
1:39835817	1:39647620	0.00622184	6.67e-06	251
1:39835817	1:39736334	0.00617162	6.99e-06	251
1:39835817	1:39669537	0.00603212	6.89e-06	251
1:39835817	1:39646787	0.00584846	7.07e-06	251
1:39835817	1:39649198	0.00568988	7.38e-06	251
1:39835817	1:39662508	0.00567066	7.27e-06	251
1:39835817	1:39662618	0.00567066	7.28e-06	251
1:39835817	1:39668015	0.00549853	7.48e-06	251
1:39835817	1:39654372	0.0052861	7.11e-06	251
1:39835817	1:39612240	0.0052861	7.11e-06	251
1:39835817	1:39922426	0.0052861	6.99e-06	251
1:39835817	1:40033905	0.00522785	9.24e-06	251
1:39835817	1:39616690	0.00517052	8.17e-06	251
1:39835817	1:39995074	0.00498466	7.4e-06	251
1:39835817	1:39683298	0.00482463	8.18e-06	251
1:39835817	1:39915209	0.0047165	8.3e-06	251
1:39835817	1:39678990	0.00468103	8.21e-06	251
1:39835817	1:39938257	0.00468038	8.68e-06	251
1:39835817	1:39629062	0.00440531	8.45e-06	251
1:39835817	1:39602755	0.0035494	1.192e-05	251
1:39835817	1:40064961	0.00352163	1.173e-05	251
1:39835817	1:39639744	0.00349363	1.156e-05	251
1:39835817	1:39591779	0.00336205	1.169e-05	251
1:39835817	1:39590409	0.00326336	1.282e-05	251
1:39835817	1:39643382	0.00293738	1.435e-05	251
1:39835817	1:39639653	0.00285414	1.393e-05	251
1:39835817	1:40003410	0.00284692	1.309e-05	251
1:39835817	1:40060473	0.00284692	1.482e-05	251
1:39835817	1:40060025	0.00260079	1.633e-05	251
1:39835817	1:39940499	0.00256766	1.553e-05	251
1:39835817	1:39967223	0.0024422	1.588e-05	251
1:39835817	1:39967280	0.0024422	1.581e-05	251
1:39835817	1:39969059	0.00237068	1.65e-05	251
1:39835817	1:39587388	0.00235865	1.639e-05	251
1:39835817	1:39554034	0.00234736	1.733e-05	251
1:39835817	1:39970928	0.00223419	1.757e-05	251
1:39835817	1:39566587	0.00202835	2.23e-05	251
1:39835817	1:39874539	0.001972	2.29e-05	251
1:39835817	1:40052108	0.00187388	2.155e-05	251
1:39835817	1:39552963	0.00181419	2.346e-05	251
1:39835817	1:40019591	0.00166598	2.581e-05	251
1:39835817	1:40018509	0.00166598	2.567e-05	251
1:39835817	1:40010235	0.00166583	2.315e-05	251
1:39835817	1:40043772	0.00166583	2.583e-05	251
1:39835817	1:40057543	0.00166572	2.582e-05	251
1:39835817	1:39562627	0.00161981	2.758e-05	251
1:39835817	1:40046093	0.00161762	2.44e-05	251
1:39835817	1:40012230	0.00161735	2.413e-05	251
1:39835817	1:40012433	0.00157037	2.423e-05	251
1:39835817	1:40045300	0.00157037	2.732e-05	251
1:39835817	1:40002356	0.00150249	2.861e-05	251
1:39835817	1:39564930	0.00144898	2.863e-05	251
1:39835817	1:40048009	0.00143934	2.855e-05	251
1:39835817	1:39569571	0.0014054	3.259e-05	251
1:39835817	1:39664858	0.00138078	2.865e-05	251
1:39835817	1:40035686	0.00135612	3.031e-05	251
1:39835817	1:40038571	0.00135416	3.205e-05	251
1:39835817	1:39840304	0.00129723	3.681e-05	251
1:39835817	1:39811205	0.00122711	3.986e-05	251
1:39835817	1:40022482	0.00120426	3.677e-05	251
1:39835817	1:39575982	0.00118751	3.624e-05	251
1:39835817	1:39803567	0.00105148	3.663e-05	251
1:39835817	1:39551488	0.00100429	4.705e-05	251
1:39835817	1:39835540	0.00097873	4.2e-05	251
1:39835817	1:40036847	0.00097384	4.648e-05	251
1:39835817	1:40028180	0.00091726	4.663e-05	251
1:39835817	1:40050058	0.00088324	9.53e-05	251
1:39835817	1:39561884	0.00087983	4.781e-05	251
1:39835817	1:39578986	0.00087574	5.165e-05	251
1:39835817	1:39616282	0.00082705	5.082e-05	251
1:39835817	1:39714238	0.00079755	5.218e-05	251
1:39835817	1:39622588	0.00078118	5.316e-05	251
1:39835817	1:39560250	0.00076822	5.493e-05	251
1:39835817	1:39784888	0.00073719	6.488e-05	251
1:39835817	1:40022777	0.00073479	6.144e-05	251
1:39835817	1:39762423	0.00073479	5.727e-05	251
1:39835817	1:39578532	0.00068459	7.053e-05	251
1:39835817	1:40065616	0.00068105	6.668e-05	251
1:39835817	1:39703847	0.00066736	7.346e-05	251
1:39835817	1:39652764	0.00065751	6.096e-05	251
1:39835817	1:39879366	0.00065751	6.209e-05	251
1:39835817	1:39576621	0.00064943	7.149e-05	251
1:39835817	1:39791876	0.00063511	7.775e-05	251
1:39835817	1:40083641	0.00060667	7.549e-05	251
1:39835817	1:40075894	0.00060667	7.479e-05	251
1:39835817	1:40001060	0.00058803	7.362e-05	251
1:39835817	1:39837344	0.00057132	7.859e-05	251
1:39835817	1:40055568	0.00056248	0.000159	251
1:39835817	1:39807458	0.00055956	7.532e-05	251
1:39835817	1:40086357	0.00055924	8.309e-05	251
1:39835817	1:39820963	0.00054901	7.443e-05	251
1:39835817	1:39824718	0.00054901	7.529e-05	251
1:39835817	1:39820926	0.00054901	7.448e-05	251
1:39835817	1:39821737	0.00054901	7.422e-05	251
1:39835817	1:40077537	0.00054432	8.514e-05	251
1:39835817	1:39842443	0.00053941	8.251e-05	251
1:39835817	1:39820138	0.00053286	7.891e-05	251
1:39835817	1:39807018	0.00053286	7.794e-05	251
1:39835817	1:39833503	0.00051721	8.054e-05	251
1:39835817	1:39664682	0.00051721	7.856e-05	251
1:39835817	1:39809284	0.00051721	8.173e-05	251
1:39835817	1:39695155	0.00050649	8.578e-05	251
1:39835817	1:40087764	0.00050634	8.491e-05	251
1:39835817	1:39812434	0.00050206	8.351e-05	251
1:39835817	1:39964912	0.00049777	8.904e-05	251
1:39835817	1:39609298	0.00049697	0.0001048	251
1:39835817	1:39832407	0.00048737	8.567e-05	251
1:39835817	1:39675340	0.00048687	0.0001832	251
1:39835817	1:39674588	0.00047753	9.174e-05	251
1:39835817	1:39858794	0.00047314	8.515e-05	251
1:39835817	1:39858947	0.00047314	8.642e-05	251
1:39835817	1:39723075	0.00047195	9.03e-05	251
1:39835817	1:39944249	0.00047168	9.464e-05	251
1:39835817	1:39729607	0.00046372	8.464e-05	251
1:39835817	1:39837627	0.00046372	8.458e-05	251
1:39835817	1:39843958	0.00045033	8.708e-05	251
1:39835817	1:39895460	0.00043305	9.506e-05	251
1:39835817	1:39846489	0.00043305	9.61e-05	251
1:39835817	1:39892774	0.00043305	9.596e-05	251
1:39835817	1:39571992	0.00042868	0.0001073	251
1:39835817	1:39588967	0.00042528	0.0001008	251
1:39835817	1:39889677	0.0004205	9.701e-05	251
1:39835817	1:39852142	0.0004205	0.0001009	251
1:39835817	1:39884433	0.0004205	9.825e-05	251
1:39835817	1:39756317	0.0004205	9.906e-05	251
1:39835817	1:39893093	0.0004205	0.0001001	251
1:39835817	1:39886773	0.0004205	9.835e-05	251
1:39835817	1:39904612	0.00041682	0.0001063	251
1:39835817	1:39609784	0.00041258	9.892e-05	251
1:39835817	1:39719812	0.00040958	0.0001225	251
1:39835817	1:39699244	0.0004041	9.877e-05	251
1:39835817	1:39699114	0.0004041	9.935e-05	251
1:39835817	1:39758955	0.00039881	0.0001042	251
1:39835817	1:39903129	0.00039656	0.0001067	251
1:39835817	1:39772070	0.00039656	0.000107	251
1:39835817	1:39908506	0.00039656	0.0001042	251
1:39835817	1:39596137	0.00039236	0.0001114	251
1:39835817	1:39881040	0.0003893	0.0001043	251
1:39835817	1:39826005	0.00038514	0.0001121	251
1:39835817	1:39779802	0.00038514	0.0001109	251
1:39835817	1:39647038	0.00038514	0.0001014	251
1:39835817	1:39911001	0.00038514	0.0001081	251
1:39835817	1:39748539	0.00038376	0.000117	251
1:39835817	1:39705458	0.00037819	0.0001073	251
1:39835817	1:39745608	0.00037406	0.0001136	251
1:39835817	1:39908726	0.00037406	0.0001102	251
1:39835817	1:39766055	0.00037406	0.0001142	251
1:39835817	1:39766649	0.00036333	0.0001183	251
1:39835817	1:39719346	0.00036101	0.0001137	251
1:39835817	1:39683175	0.00035924	0.0001101	251
1:39835817	1:39730172	0.00035684	0.0001169	251
1:39835817	1:39726182	0.00035684	0.0001157	251
1:39835817	1:39623307	0.00035292	0.0001124	251
1:39835817	1:39624380	0.00034888	0.0001239	251
1:39835817	1:39622823	0.00034888	0.0001258	251
1:39835817	1:39668682	0.00034472	0.0001527	251
1:39835817	1:39758993	0.00034284	0.0001236	251
1:39835817	1:39744618	0.00034284	0.0001224	251
1:39835817	1:39643464	0.00033701	0.0001282	251
1:39835817	1:39748921	0.00033306	0.0001253	251
1:39835817	1:39741520	0.00033306	0.0001244	251
1:39835817	1:39742869	0.00033306	0.0001237	251
1:39835817	1:39621552	0.0003291	0.0001333	251
1:39835817	1:39717256	0.00032357	0.0001332	251
1:39835817	1:39653994	0.00031955	0.0001437	251
1:39835817	1:39672545	0.00031479	0.0001556	251
1:39835817	1:39656401	0.00031438	0.000133	251
1:39835817	1:39713113	0.00031438	0.00014	251
1:39835817	1:39671492	0.00030928	0.0001448	251
1:39835817	1:39942297	0.00030904	0.0001408	251
1:39835817	1:39643712	0.00030713	0.0001494	251
1:39835817	1:39719519	0.00030364	0.0001662	251
1:39835817	1:39566766	0.00030027	0.0001467	251
1:39835817	1:39928984	0.00029681	0.000147	251
1:39835817	1:39934776	0.00029681	0.000149	251
1:39835817	1:39628411	0.00029216	0.0001464	251
1:39835817	1:39637305	0.00029216	0.000147	251
1:39835817	1:39937696	0.00028843	0.0001568	251
1:39835817	1:39733499	0.0002803	0.0001499	251
1:39835817	1:40023047	0.00027869	0.0001543	251
1:39835817	1:39631297	0.00027121	0.0001565	251
1:39835817	1:40005903	0.00027034	0.0001903	251
1:39835817	1:39922884	0.00026476	0.0001635	251
1:39835817	1:39772305	0.00026476	0.0001662	251
1:51109269	1:51109269	0.0400563	3.766e-05	1903
1:51109269	1:51371551	0.0079066	0.0003752	1903
1:51109269	1:51372251	0.00777908	0.0003774	1903
1:51109269	1:50933200	0.00505236	0.0006058	1903
1:51109269	1:51457200	0.00465683	0.0006378	1903
1:51109269	1:51442137	0.00458309	0.0006812	1903
1:51109269	1:51451372	0.00430059	0.0007278	1903
1:51109269	1:51450144	0.00430059	0.0007285	1903
1:51109269	1:51452068	0.00430059	0.0007264	1903
1:51109269	1:51371608	0.00427978	0.0007501	1903
1:51109269	1:51450445	0.00423296	0.0007337	1903
1:51109269	1:50920161	0.00413092	0.0007567	1903
1:51109269	1:51463424	0.00403694	0.0007694	1903
1:51109269	1:50945526	0.00399315	0.0007845	1903
1:51109269	1:51483605	0.00385076	0.0008304	1903
1:51109269	1:51488572	0.00384543	0.0007996	1903
1:51109269	1:51438365	0.00382532	0.0008375	1903
1:51109269	1:51440093	0.00379585	0.0008249	1903
1:51109269	1:51497037	0.00378587	0.0008331	1903
1:51109269	1:51419336	0.00373185	0.0008307	1903
1:51109269	1:51438881	0.00373185	0.0008236	1903
1:51109269	1:51489794	0.00372731	0.00084	1903
1:51109269	1:50942784	0.00369169	0.0008364	1903
1:51109269	1:51192756	0.00367818	0.0008619	1903
1:51109269	1:51419038	0.00361694	0.0008569	1903
1:51109269	1:50944634	0.00355412	0.0009115	1903
1:51109269	1:51250908	0.00350908	0.0009183	1903
1:51109269	1:51252471	0.00350908	0.000912	1903
1:51109269	1:51249528	0.00350908	0.0009154	1903
1:51109269	1:51419841	0.00350908	0.0008955	1903
1:51109269	1:51137906	0.00350587	0.0008714	1903
1:51109269	1:50949727	0.00346062	0.0008838	1903
1:51109269	1:51256698	0.00345461	0.000922	1903
1:51109269	1:51261965	0.00345461	0.0009209	1903
1:51109269	1:51260999	0.00345461	0.0009251	1903
1:51109269	1:50973264	0.00345461	0.0008852	1903
1:51109269	1:51260668	0.00345461	0.000921	1903
1:51109269	1:51276490	0.00345461	0.0009091	1903
1:51109269	1:50923454	0.00340369	0.0008868	1903
1:51109269	1:51249315	0.00340106	0.0009424	1903
1:51109269	1:51255320	0.00340106	0.0009459	1903
1:51109269	1:51266523	0.00340106	0.0009412	1903
1:51109269	1:51272278	0.00340106	0.0009489	1903
1:51109269	1:51494003	0.00339606	0.0009466	1903
1:51109269	1:51252618	0.00338701	0.0009451	1903
1:51109269	1:50963518	0.00335073	0.0009113	1903
1:51109269	1:51255677	0.00334842	0.0009469	1903
1:51109269	1:51265368	0.00334842	0.0009511	1903
1:51109269	1:51423779	0.00334619	0.0009285	1903
1:51109269	1:51491469	0.00334404	0.0009478	1903
1:51109269	1:50909985	0.00333997	0.0009735	1903
1:51109269	1:50928775	0.00329866	0.0009205	1903
1:51109269	1:51269018	0.00329667	0.0009495	1903
1:51109269	1:51416823	0.00329667	0.0009689	1903
1:51109269	1:51127524	0.00329667	0.0009629	1903
1:51109269	1:51262653	0.00329667	0.0009644	1903
1:51109269	1:51248316	0.00329667	0.0009274	1903
1:51109269	1:51246155	0.00328621	0.0009555	1903
1:51109269	1:51276715	0.00324579	0.0009884	1903
1:51109269	1:51266474	0.00324579	0.0009486	1903
1:51109269	1:51262664	0.00324579	0.0009846	1903
1:51109269	1:51470403	0.00324416	0.0009575	1903
1:51109269	1:50943370	0.00323969	0.0009668	1903
1:51109269	1:50931683	0.00319717	0.0009643	1903
1:51109269	1:51418616	0.00319717	0.001004	1903
1:51109269	1:51136876	0.00319576	0.00098	1903
1:51109269	1:51415652	0.00319576	0.000979	1903
1:51109269	1:51472241	0.00319442	0.0009615	1903
1:51109269	1:51482411	0.00319315	0.0009756	1903
1:51109269	1:51499822	0.00319194	0.0009689	1903
1:51109269	1:51353068	0.00318773	0.001052	1903
1:51109269	1:51237302	0.00314658	0.001022	1903
1:51109269	1:51129203	0.00314552	0.000984	1903
1:51109269	1:51124579	0.00314552	0.0009858	1903
1:51109269	1:51415247	0.00314552	0.0009851	1903
1:51109269	1:50960180	0.00309908	0.001021	1903
1:51109269	1:51190459	0.00309823	0.001051	1903
1:51109269	1:51284557	0.00309823	0.001023	1903
1:51109269	1:51191935	0.00309823	0.0009981	1903
1:51109269	1:51201424	0.00309823	0.001037	1903
1:51109269	1:51173603	0.00309823	0.001004	1903
1:51109269	1:51219188	0.00309823	0.001042	1903
1:51109269	1:51136273	0.00309743	0.00101	1903
1:51109269	1:51126914	0.00309743	0.001008	1903
1:51109269	1:50954128	0.00309483	0.001017	1903
1:51109269	1:51220291	0.00305068	0.001045	1903
1:51109269	1:51166302	0.00305068	0.001014	1903
1:51109269	1:51220680	0.00305068	0.001045	1903
1:51109269	1:51243642	0.00305068	0.001055	1903
1:51109269	1:51283510	0.00305068	0.001043	1903
1:51109269	1:51223263	0.00305068	0.001047	1903
1:51109269	1:51121526	0.00305015	0.001026	1903
1:51109269	1:51023860	0.00305015	0.001038	1903
1:51109269	1:51145808	0.00305015	0.00102	1903
1:51109269	1:51439777	0.00304924	0.001036	1903
1:51109269	1:51489204	0.00304887	0.00102	1903
1:51109269	1:51232628	0.00300394	0.001076	1903
1:51109269	1:51235816	0.00300394	0.001074	1903
1:51109269	1:51190314	0.00300394	0.00108	1903
1:51109269	1:51286155	0.00300394	0.001069	1903
1:51109269	1:51140636	0.00300394	0.001033	1903
1:51109269	1:51139001	0.00300365	0.001042	1903
1:51109269	1:51239976	0.00300365	0.00104	1903
1:51109269	1:51162128	0.00300365	0.001024	1903
1:51109269	1:51240851	0.00300365	0.001039	1903
1:51109269	1:51356132	0.00300342	0.001093	1903
1:51109269	1:51284905	0.00300299	0.001106	1903
1:51109269	1:50959262	0.00295806	0.001046	1903
1:51109269	1:51193984	0.00295797	0.001055	1903
1:51109269	1:51190932	0.00295797	0.001051	1903
1:51109269	1:51299810	0.00295797	0.001064	1903
1:51109269	1:51200136	0.00295797	0.001084	1903
1:51109269	1:51284446	0.00295794	0.001078	1903
1:51109269	1:51143665	0.00295793	0.001046	1903
1:51109269	1:51314531	0.00295793	0.001075	1903
1:51109269	1:51231935	0.00295793	0.001045	1903
1:51109269	1:51197315	0.00295793	0.001053	1903
1:51109269	1:51208574	0.00291297	0.00107	1903
1:51109269	1:50971801	0.00291297	0.001077	1903
1:51109269	1:51223002	0.00291297	0.001069	1903
1:51109269	1:51226265	0.00291297	0.001065	1903
1:51109269	1:51205760	0.00291297	0.001066	1903
1:51109269	1:51290830	0.00291278	0.001104	1903
1:51109269	1:51303714	0.00291278	0.001111	1903
1:51109269	1:51306329	0.00291278	0.001121	1903
1:51109269	1:51213677	0.00291278	0.001077	1903
1:51109269	1:50964446	0.00291263	0.001117	1903
1:51109269	1:50963858	0.00291263	0.001078	1903
1:51109269	1:50958027	0.00291263	0.001058	1903
1:51109269	1:51118527	0.00286876	0.001098	1903
1:51109269	1:51101616	0.00286876	0.001113	1903
1:51109269	1:51228799	0.00286876	0.001081	1903
1:51109269	1:51095195	0.00286876	0.001098	1903
1:51109269	1:51217839	0.00286876	0.001092	1903
1:51109269	1:51116118	0.00286876	0.001096	1903
1:51109269	1:51312992	0.00286876	0.001097	1903
1:51109269	1:51217085	0.00286834	0.001106	1903
1:51109269	1:51286954	0.00286834	0.001096	1903
1:51109269	1:50961221	0.00286795	0.001075	1903
1:51109269	1:51179515	0.00286795	0.001118	1903
1:51109269	1:51294132	0.00282528	0.00112	1903
1:51109269	1:51224872	0.00282528	0.001099	1903
1:51109269	1:51221406	0.00282528	0.001106	1903
1:51109269	1:51221103	0.00282528	0.001106	1903
1:51109269	1:51293606	0.00282528	0.001109	1903
1:51109269	1:51310062	0.00282528	0.0011	1903
1:51109269	1:51223500	0.00282528	0.001101	1903
1:51109269	1:51299687	0.00282528	0.001113	1903
1:51109269	1:51310327	0.00282528	0.001119	1903
1:51109269	1:51148711	0.00282464	0.001111	1903
1:51109269	1:51295793	0.00282464	0.001118	1903
1:51109269	1:51296907	0.00282464	0.001121	1903
1:51109269	1:51413964	0.00278341	0.001177	1903
1:51109269	1:50971408	0.00278252	0.001131	1903
1:51109269	1:51072297	0.00278252	0.001155	1903
1:51109269	1:51306002	0.00278252	0.001136	1903
1:51109269	1:51103180	0.00278252	0.001142	1903
1:51109269	1:51303605	0.00278252	0.001129	1903
1:51109269	1:51306273	0.00278252	0.001139	1903
1:51109269	1:51314649	0.00278167	0.001178	1903
1:51109269	1:50966976	0.00278167	0.001137	1903
1:51109269	1:51493428	0.00274156	0.001177	1903
1:51109269	1:51225510	0.00274047	0.001137	1903
1:51109269	1:50981205	0.00274047	0.001138	1903
1:51109269	1:51301657	0.00274047	0.001139	1903
1:51109269	1:51107959	0.00274047	0.00116	1903
1:51109269	1:50967206	0.00273838	0.001167	1903
1:51109269	1:51315456	0.00269911	0.001178	1903
1:51109269	1:51324546	0.00269911	0.001177	1903
1:51109269	1:50966301	0.00269786	0.001162	1903
1:51109269	1:50969571	0.00269786	0.001189	1903
1:51109269	1:51299597	0.00266775	0.001227	1903
1:51109269	1:50935031	0.00266297	0.001211	1903
1:51109269	1:51072387	0.00265844	0.001204	1903
1:51109269	1:51333179	0.00265844	0.001207	1903
1:51109269	1:50977678	0.00265844	0.001222	1903
1:51109269	1:51328773	0.00265844	0.001174	1903
1:51109269	1:51328987	0.00265844	0.001193	1903
1:51109269	1:51068657	0.00265844	0.001221	1903
1:51109269	1:51334304	0.00261844	0.001214	1903
1:51109269	1:51334488	0.00261844	0.001197	1903
1:51109269	1:51356830	0.00261844	0.001216	1903
1:51109269	1:51019450	0.00261844	0.001229	1903
1:51109269	1:50970475	0.00261681	0.001229	1903
1:51109269	1:51342035	0.0025791	0.001238	1903
1:51109269	1:51342809	0.0025791	0.00124	1903
1:51109269	1:51225269	0.0025791	0.001259	1903
1:51109269	1:51339332	0.0025791	0.001235	1903
1:51109269	1:51351281	0.00257729	0.001261	1903
1:51109269	1:51351846	0.00255926	0.001321	1903
1:51109269	1:51346663	0.0025404	0.00124	1903
1:51109269	1:51355823	0.0025404	0.001269	1903
1:51109269	1:51053585	0.0025404	0.001269	1903
1:51109269	1:51342856	0.00253842	0.00127	1903
1:51109269	1:51340401	0.00253842	0.00127	1903
1:51109269	1:51347213	0.00251342	0.001326	1903
1:51109269	1:50986747	0.00250452	0.001269	1903
1:51109269	1:50987827	0.00250452	0.001273	1903
1:51109269	1:50975971	0.00250235	0.001299	1903
1:51109269	1:50992756	0.00250235	0.001313	1903
1:51109269	1:51269954	0.00249387	0.001307	1903
1:51109269	1:51363273	0.00246491	0.00132	1903
1:51109269	1:51027391	0.00246491	0.001302	1903
1:51109269	1:51357343	0.00246491	0.001316	1903
1:51109269	1:51010143	0.00246491	0.001325	1903
1:51109269	1:51418553	0.0024626	0.001302	1903
1:51109269	1:51353720	0.00244069	0.001379	1903
1:51109269	1:51212796	0.0024356	0.001316	1903
1:51109269	1:51366576	0.0024281	0.001346	1903
1:51109269	1:51369991	0.0024281	0.001348	1903
1:51109269	1:51363096	0.0024281	0.001318	1903
1:51109269	1:51356810	0.00242563	0.00134	1903
1:51109269	1:51005792	0.00239188	0.001371	1903
1:51109269	1:51374764	0.00235625	0.001383	1903
1:51109269	1:51374139	0.00235625	0.00138	1903
1:51109269	1:51374608	0.00235625	0.001373	1903
1:51109269	1:51367420	0.0023535	0.001378	1903
1:51109269	1:50908098	0.00233993	0.001366	1903
1:51109269	1:51362441	0.00231832	0.001433	1903
1:51109269	1:50908741	0.00230403	0.001396	1903
1:51109269	1:51374242	0.00229284	0.001442	1903
1:51109269	1:50999695	0.00228674	0.001447	1903
1:51109269	1:51122249	0.00226557	0.001465	1903
1:51109269	1:51379945	0.00225284	0.001475	1903
1:51109269	1:50904241	0.00220316	0.001472	1903
1:51109269	1:51485912	0.00217744	0.001576	1903
1:51109269	1:51433687	0.0021756	0.001539	1903
1:51109269	1:51387415	0.00215439	0.001505	1903
1:51109269	1:51393412	0.00212263	0.001555	1903
1:51109269	1:51394758	0.00211061	0.001687	1903
1:51109269	1:51394098	0.00208766	0.001591	1903
1:51109269	1:51391845	0.00208766	0.001579	1903
1:51109269	1:51399215	0.00206065	0.001609	1903
1:51109269	1:51398101	0.00205682	0.001618	1903
1:51109269	1:50897841	0.00204154	0.001608	1903
1:51109269	1:51401419	0.00203041	0.001621	1903
1:51109269	1:51388895	0.00202649	0.001633	1903
1:51109269	1:50906366	0.0020108	0.001577	1903
1:51109269	1:51403897	0.00200066	0.001671	1903
1:51109269	1:51391569	0.00199664	0.001654	1903
1:51109269	1:51404041	0.00197139	0.001663	1903
1:51109269	1:51406874	0.00197139	0.001683	1903
1:51109269	1:51405667	0.00197139	0.001709	1903
1:51109269	1:50900021	0.00195086	0.001669	1903
1:51109269	1:51393645	0.00188543	0.001799	1903
1:51109269	1:50891117	0.0018646	0.001788	1903
1:51109269	1:51242141	0.00173944	0.001908	1903
1:51109269	1:50894498	0.00165934	0.002046	1903
1:51109269	1:51443389	0.00162506	0.001977	1903
1:51109269	1:50892538	0.00160611	0.002039	1903
1:51109269	1:50896037	0.00159757	0.002049	1903
1:51109269	1:50871128	0.0015175	0.003869	1903
1:51109269	1:50895031	0.00150229	0.002269	1903
1:51109269	1:51508467	0.00148015	0.002313	1903
1:51109269	1:51370926	0.00145445	0.002351	1903
1:51109269	1:51506886	0.00143347	0.002432	1903
1:51109269	1:50939377	0.00136673	0.005497	1903
1:51109269	1:51168892	0.00133614	0.002452	1903
1:51109269	1:51508526	0.00133534	0.002629	1903
1:51109269	1:51117124	0.0013138	0.002585	1903
1:51109269	1:51225273	0.00130584	0.002599	1903
1:51109269	1:51508282	0.00126219	0.002769	1903
1:51109269	1:51209148	0.00124169	0.002963	1903
1:51109269	1:51532358	0.00122653	0.002907	1903
1:51109269	1:51519027	0.00121025	0.002921	1903
1:51109269	1:51517693	0.00119347	0.002925	1903
1:51109269	1:51530989	0.00119325	0.002899	1903
1:51109269	1:51528752	0.00118783	0.002916	1903
1:51109269	1:51532590	0.00118241	0.002948	1903
1:51109269	1:51527642	0.00118239	0.003016	1903
1:51109269	1:51682019	0.00117415	0.00447	1903
1:51109269	1:51523990	0.00116613	0.002985	1903
1:51109269	1:51512080	0.00115523	0.002977	1903
1:51109269	1:51512441	0.0011289	0.003044	1903
1:51109269	1:51705040	0.00111682	0.007626	1903
1:51109269	1:51564904	0.00110962	0.007255	1903
1:51109269	1:51531838	0.00106986	0.003318	1903
1:51109269	1:51256091	0.00104628	0.00314	1903
1:51109269	1:51568914	0.00101958	0.00721	1903
1:51109269	1:51178559	0.00100334	0.003478	1903
1:51109269	1:51439959	0.00100037	0.008958	1903
1:51109269	1:51009545	0.00096148	0.004066	1903
1:51109269	1:51012093	0.00089965	0.003818	1903
1:51109269	1:51153604	0.00082853	0.009796	1903
1:51109269	1:50965037	0.00078414	0.005923	1903
1:51109269	1:51134336	0.00075732	0.004695	1903
1:51109269	1:51355343	0.00074937	0.005067	1903
1:51109269	1:51372094	0.00070318	0.005934	1903
1:51109269	1:51515746	0.00068718	0.005585	1903
1:51109269	1:50855451	0.00067804	0.00612	1903
1:51109269	1:51129678	0.00066383	0.005514	1903
1:51109269	1:50876351	0.00065703	0.01445	1903
1:51109269	1:51348414	0.00065522	0.0057	1903
1:51109269	1:51661684	0.00064753	0.01172	1903
1:51109269	1:51335094	0.00063076	0.005231	1903
1:51109269	1:51231714	0.00060772	0.006259	1903
1:51109269	1:51703028	0.00059252	0.01832	1903
1:51109269	1:51128388	0.00059016	0.006709	1903
1:51109269	1:50873897	0.00057404	0.01773	1903
1:51109269	1:51063426	0.00056897	0.01108	1903
1:51109269	1:51278931	0.00055929	0.01965	1903
1:51109269	1:50969203	0.00055653	0.01967	1903
1:51109269	1:51355033	0.00054811	0.007288	1903
1:51109269	1:51282978	0.0005427	0.006963	1903
1:51109269	1:51462667	0.00053794	0.01749	1903
1:51109269	1:51602531	0.00053475	0.01876	1903
1:51109269	1:51252105	0.00052935	0.00708	1903
1:51109269	1:51496597	0.00052813	0.006601	1903
1:51109269	1:51498067	0.00052533	0.006587	1903
1:51109269	1:51588801	0.00052217	0.01949	1903
1:51109269	1:51499525	0.00051076	0.006679	1903
1:51109269	1:51156276	0.00050492	0.00728	1903
1:51109269	1:51293111	0.00049576	0.01941	1903
1:51109269	1:51324996	0.00049215	0.01956	1903
1:51109269	1:50841670	0.00048304	0.01885	1903
1:51109269	1:51630753	0.00048215	0.01231	1903
1:51109269	1:50845275	0.00048197	0.0245	1903
1:51109269	1:51720835	0.00047174	0.02516	1903
1:51109269	1:51071310	0.00047002	0.02269	1903
1:51109269	1:51253501	0.00046908	0.01427	1903
1:51109269	1:51501896	0.00046324	0.007606	1903
1:51109269	1:50993063	0.00045041	0.02678	1903
1:51109269	1:51370117	0.00044687	0.007945	1903
1:51109269	1:51014348	0.00044571	0.02256	1903
1:51109269	1:51231279	0.00044264	0.008796	1903
1:51109269	1:51401209	0.00044131	0.01492	1903
1:51109269	1:51497278	0.0004366	0.008286	1903
1:51109269	1:51585461	0.0004364	0.02827	1903
1:51109269	1:51495673	0.00043488	0.00829	1903
1:51109269	1:50917597	0.0004121	0.0304	1903
1:51109269	1:51559710	0.00040803	0.02276	1903
1:51109269	1:51435946	0.00040548	0.01671	1903
1:51109269	1:51663872	0.00039804	0.03245	1903
1:51109269	1:51248421	0.00039547	0.01705	1903
1:51109269	1:51350996	0.00039484	0.01442	1903
1:51109269	1:51371609	0.00039262	0.01092	1903
1:51109269	1:51351960	0.00037194	0.02839	1903
1:51109269	1:51564493	0.00037175	0.03596	1903
1:51109269	1:51555712	0.00036734	0.006856	1903
1:51109269	1:51602271	0.00036543	0.03669	1903
1:51109269	1:51348871	0.00036439	0.01196	1903
1:51109269	1:51632964	0.00036255	0.006684	1903
1:51109269	1:51693266	0.0003611	0.03708	1903
1:51109269	1:51633734	0.00035735	0.03567	1903
1:51109269	1:51203745	0.00035588	0.01046	1903
1:51109269	1:51642288	0.00035314	0.03702	1903
1:51109269	1:51021867	0.00034977	0.01115	1903
1:51109269	1:51289932	0.0003438	0.03717	1903
1:51109269	1:51281684	0.00034371	0.04002	1903
1:51109269	1:51155182	0.00034218	0.03745	1903
1:51109269	1:51163951	0.00034075	0.01008	1903
1:51109269	1:51670983	0.00033982	0.03848	1903
1:51109269	1:51526232	0.00033769	0.01109	1903
1:51109269	1:51509860	0.00033534	0.02084	1903
1:51109269	1:51224137	0.00033101	0.03911	1903
1:51109269	1:51007149	0.00032829	0.03882	1903
1:51109269	1:51533566	0.00032461	0.02134	1903
1:51109269	1:51196320	0.00032291	0.04394	1903
1:51109269	1:51479892	0.00032268	0.04475	1903
1:51109269	1:51728883	0.00032207	0.01889	1903
1:51109269	1:50915773	0.00032114	0.03752	1903
1:51109269	1:51260599	0.00032111	0.02585	1903
1:51109269	1:51145527	0.00032086	0.04422	1903
1:51109269	1:51183967	0.00032029	0.04452	1903
1:51109269	1:51295908	0.00031712	0.04273	1903
1:51109269	1:51172358	0.00031669	0.04519	1903
1:51109269	1:51084189	0.00031664	0.04191	1903
1:51109269	1:51598688	0.00031594	0.00792	1903
1:51109269	1:51504333	0.00031414	0.01196	1903
1:51109269	1:50884230	0.00031116	0.01418	1903
1:51109269	1:51769464	0.00031022	0.04751	1903
1:51109269	1:50966080	0.00030896	0.04385	1903
1:51109269	1:51597866	0.00030607	0.0469	1903
1:51109269	1:51512469	0.00030564	0.02313	1903
1:51109269	1:51121024	0.00030367	0.03697	1903
1:51109269	1:51419147	0.00030182	0.01195	1903
1:51109269	1:51639128	0.00029689	0.008273	1903
1:51109269	1:51488697	0.00029614	0.01095	1903
1:51109269	1:51312619	0.00029424	0.01186	1903
1:51109269	1:51731693	0.00029347	0.02822	1903
1:51109269	1:50865378	0.00029012	0.01639	1903
1:51109269	1:51392288	0.00028962	0.05236	1903
1:51109269	1:50906516	0.00028721	0.05352	1903
1:51109269	1:51204488	0.00028342	0.03949	1903
1:51109269	1:51496464	0.00028295	0.01169	1903
1:51109269	1:51540864	0.00028115	0.0264	1903
1:51109269	1:51505418	0.00028023	0.05486	1903
1:51109269	1:50870261	0.0002798	0.05418	1903
1:51109269	1:51280288	0.00027931	0.01611	1903
1:51109269	1:51487616	0.00027652	0.05747	1903
1:51109269	1:50971715	0.00027641	0.05704	1903
1:51109269	1:51500452	0.00027453	0.01209	1903
1:51109269	1:51591035	0.00027311	0.05177	1903
1:51109269	1:51309174	0.00027197	0.04935	1903
1:51109269	1:51328807	0.0002704	0.027	1903
1:51109269	1:51194714	0.00026881	0.01402	1903
1:51109269	1:51234090	0.00026752	0.04978	1903
1:51109269	1:51583778	0.00026604	0.05375	1903
1:51109269	1:50940079	0.00026484	0.05668	1903
1:51109269	1:51563972	0.00026334	0.05426	1903
1:51109269	1:51194718	0.00026197	0.01931	1903
1:51109269	1:51528936	0.00026054	0.05416	1903
1:51109269	1:51524583	0.0002575	0.06409	1903
1:51109269	1:51487154	0.00025671	0.06468	1903
1:51109269	1:51510030	0.00025543	0.01472	1903
1:51109269	1:51628557	0.00025528	0.06217	1903
1:51109269	1:51136102	0.0002522	0.01507	1903
1:51109269	1:51421328	0.0002522	0.01507	1903
1:51109269	1:51530051	0.00025208	0.01524	1903
1:51109269	1:51216484	0.00025186	0.05749	1903
1:51109269	1:51500769	0.00025062	0.0129	1903
1:51109269	1:51773517	0.00024994	0.06429	1903
1:51109269	1:51179311	0.00024991	0.0235	1903
1:51109269	1:51593250	0.00024975	0.06005	1903
1:51109269	1:51428413	0.00024966	0.02345	1903
1:51109269	1:51518564	0.00024903	0.01515	1903
1:51109269	1:51528265	0.00024892	0.01513	1903
1:51109269	1:51528697	0.00024892	0.01529	1903
1:51109269	1:51544446	0.00024661	0.06964	1903
1:51109269	1:51524590	0.0002459	0.01565	1903
1:51109269	1:51529745	0.00024581	0.01581	1903
1:51109269	1:51475978	0.00024572	0.05914	1903
1:51109269	1:51674380	0.0002448	0.06244	1903
1:51109269	1:51743306	0.00024384	0.05808	1903
1:51109269	1:51530486	0.00024269	0.01574	1903
1:51109269	1:51509878	0.00024246	0.0209	1903
1:51109269	1:51569267	0.00024177	0.07133	1903
1:51109269	1:51280132	0.00024057	0.01531	1903
1:51109269	1:51514912	0.00023978	0.0158	1903
1:51109269	1:51517679	0.00023978	0.01584	1903
1:51109269	1:51406838	0.00023683	0.01578	1903
1:51109269	1:51527308	0.00023676	0.01626	1903
1:51109269	1:51028154	0.0002359	0.02943	1903
1:51109269	1:51387240	0.0002351	0.06307	1903
1:51109269	1:50843017	0.00023427	0.07063	1903
1:51109269	1:51566227	0.000234	0.07162	1903
1:51109269	1:51392238	0.00023388	0.01634	1903
1:51109269	1:51525330	0.00023383	0.01628	1903
1:51109269	1:51318745	0.00023083	0.07581	1903
1:51109269	1:51087672	0.00023059	0.07852	1903
1:51109269	1:51251753	0.00023056	0.06502	1903
1:51109269	1:51634386	0.00022877	0.03107	1903
1:51109269	1:51445191	0.00022796	0.06603	1903
1:51109269	1:51152444	0.00022712	0.07973	1903
1:51109269	1:50977279	0.00022611	0.01517	1903
1:51109269	1:51348326	0.00022596	0.07466	1903
1:51109269	1:51371560	0.00022518	0.01703	1903
1:51109269	1:51118253	0.00022299	0.01486	1903
1:51109269	1:51366207	0.00022107	0.06678	1903
1:51109269	1:51049046	0.0002163	0.08835	1903
1:51109269	1:51002702	0.00021545	0.08902	1903
1:51109269	1:51516961	0.00021527	0.08249	1903
1:51109269	1:51033038	0.00021486	0.08941	1903
1:51109269	1:51763952	0.00021415	0.02501	1903
1:51109269	1:51256572	0.00021414	0.03425	1903
1:51109269	1:51377176	0.00021346	0.03615	1903
1:51109269	1:50891021	0.00021089	0.03095	1903
1:51109269	1:50852523	0.00021	0.02923	1903
1:51109269	1:50839215	0.000208	0.09558	1903
1:51109269	1:50944341	0.00020789	0.02202	1903
1:51109269	1:51530836	0.00020753	0.01681	1903
1:51109269	1:51712779	0.00020683	0.03697	1903
1:51109269	1:51480595	0.00020575	0.04	1903
1:51109269	1:51760437	0.00020532	0.0782	1903
1:51109269	1:51391252	0.00020532	0.07643	1903
1:51109269	1:51149422	0.0002051	0.01723	1903
1:51109269	1:51750909	0.00020185	0.01362	1903
1:51109269	1:50950806	0.00020167	0.01643	1903
1:51109269	1:51735987	0.00019898	0.1039	1903
1:51109269	1:50831095	0.00019892	0.09322	1903
1:51109269	1:51060301	0.00019815	0.03885	1903
1:51109269	1:51778734	0.00019654	0.02783	1903
1:51109269	1:51593565	0.00019493	0.1076	1903
1:51109269	1:50874943	0.0001942	0.108	1903
1:51109269	1:51551957	0.0001932	0.06322	1903
1:51109269	1:51476927	0.00019298	0.1034	1903
1:51109269	1:51557818	0.00019083	0.06387	1903
1:51109269	1:51507464	0.00019062	0.01798	1903
1:51109269	1:50825726	0.00018929	0.07301	1903
1:51109269	1:50843508	0.00018761	0.07427	1903
1:51109269	1:51435610	0.0001874	0.09616	1903
1:51109269	1:51045014	0.00018572	0.1046	1903
1:51109269	1:51510942	0.00018553	0.03297	1903
1:51109269	1:51525002	0.00018534	0.01897	1903
1:51109269	1:51634276	0.00018531	0.03057	1903
1:51109269	1:51240728	0.00018414	0.1114	1903
1:51109269	1:51655047	0.00018364	0.04355	1903
1:51109269	1:51267681	0.00018326	0.1123	1903
1:51109269	1:51267603	0.00018326	0.1124	1903
1:51109269	1:51532863	0.0001831	0.01885	1903
1:51109269	1:51180704	0.00018235	0.05707	1903
1:51109269	1:51428584	0.00018188	0.1136	1903
1:51109269	1:51685058	0.00018119	0.04135	1903
1:51109269	1:51125160	0.00018055	0.02478	1903
1:51109269	1:51178067	0.00018021	0.1163	1903
1:51109269	1:51069102	0.00018007	0.01888	1903
1:51109269	1:50900621	0.00017978	0.1294	1903
1:51109269	1:51211046	0.0001795	0.1299	1903
1:51109269	1:51180020	0.00017775	0.04854	1903
1:51109269	1:50925643	0.00017641	0.1354	1903
1:51109269	1:51043410	0.00017616	0.1213	1903
1:51109269	1:51315012	0.00017493	0.1178	1903
1:51109269	1:51395852	0.0001748	0.1251	1903
1:51109269	1:51396316	0.0001748	0.1251	1903
1:51109269	1:51410138	0.00017452	0.05977	1903
1:51109269	1:51719141	0.00017442	0.1391	1903
1:51109269	1:51514557	0.00017393	0.0224	1903
1:51109269	1:51228993	0.0001735	0.06043	1903
1:51109269	1:51263582	0.00017313	0.06056	1903
1:51109269	1:50944497	0.00017305	0.03715	1903
1:51109269	1:51084589	0.00017229	0.04824	1903
1:51109269	1:51113924	0.00017223	0.1188	1903
1:51109269	1:51024847	0.00017206	0.1052	1903
1:51109269	1:51354396	0.00017182	0.06108	1903
1:51109269	1:51729227	0.0001714	0.1449	1903
1:51109269	1:51287749	0.00017117	0.06129	1903
1:51109269	1:51509930	0.00017053	0.02019	1903
1:51109269	1:51016498	0.0001703	0.0204	1903
1:51109269	1:51575947	0.00016971	0.1311	1903
1:51109269	1:51001870	0.00016942	0.1077	1903
1:51109269	1:51664122	0.00016866	0.08433	1903
1:51109269	1:51648559	0.0001684	0.145	1903
1:51109269	1:50882446	0.00016818	0.1122	1903
1:51109269	1:51178747	0.00016614	0.05179	1903
1:51109269	1:51654703	0.00016611	0.1287	1903
1:51109269	1:51054322	0.00016446	0.02202	1903
1:51109269	1:51012279	0.00016338	0.02145	1903
1:51109269	1:51019273	0.00016338	0.02099	1903
1:51109269	1:50989435	0.00016338	0.02155	1903
1:51109269	1:51116255	0.00016141	0.1159	1903
1:51109269	1:51504668	0.00016105	0.1455	1903
1:51109269	1:51011646	0.00016052	0.13	1903
1:51109269	1:51510825	0.00016052	0.03507	1903
1:51109269	1:51677123	0.00016002	0.1359	1903
1:51109269	1:51271125	0.0001597	0.167	1903
1:51109269	1:51285377	0.0001592	0.06713	1903
1:51109269	1:51438293	0.00015906	0.0714	1903
1:51109269	1:51300606	0.00015836	0.1465	1903
1:51109269	1:51602395	0.00015714	0.08478	1903
1:51109269	1:50861318	0.00015602	0.04231	1903
1:51109269	1:51364011	0.00015589	0.1106	1903
1:51109269	1:51400460	0.00015574	0.1537	1903
1:51109269	1:51588429	0.00015504	0.05295	1903
1:51109269	1:51068524	0.00015501	0.1583	1903
1:51109269	1:51106719	0.00015453	0.1243	1903
1:51109269	1:51190270	0.00015397	0.1134	1903
1:51109269	1:51716152	0.00015343	0.0373	1903
1:51109269	1:51766928	0.00015331	0.03963	1903
1:51109269	1:51208413	0.00015282	0.1951	1903
1:51109269	1:51107462	0.00015271	0.1427	1903
1:51109269	1:50913388	0.0001518	0.06092	1903
1:51109269	1:51231444	0.00015159	0.1466	1903
1:51109269	1:50849881	0.00015116	0.04771	1903
1:51109269	1:51525867	0.0001503	0.08845	1903
1:51109269	1:51131487	0.00015029	0.1473	1903
1:51109269	1:50978756	0.0001501	0.08698	1903
1:51109269	1:51073495	0.00015003	0.1759	1903
1:51109269	1:51070881	0.00014971	0.1972	1903
1:51109269	1:51187587	0.00014955	0.1531	1903
1:51109269	1:51043464	0.00014929	0.09735	1903
1:51109269	1:51614686	0.00014913	0.1658	1903
1:51109269	1:50824460	0.00014903	0.1276	1903
1:51109269	1:51067081	0.00014811	0.194	1903
1:51109269	1:51196493	0.000148	0.08859	1903
1:51109269	1:50975499	0.00014767	0.1077	1903
1:51109269	1:51087556	0.0001473	0.1942	1903
1:51109269	1:51260540	0.00014712	0.1729	1903
1:51109269	1:51235542	0.00014689	0.1735	1903
1:51109269	1:50992883	0.00014686	0.02438	1903
1:51109269	1:51204039	0.00014677	0.08952	1903
1:51109269	1:51665418	0.00014657	0.04058	1903
1:51109269	1:51778170	0.00014622	0.1108	1903
1:51109269	1:51762846	0.00014619	0.04168	1903
1:51109269	1:51209146	0.00014595	0.09026	1903
1:51109269	1:50861071	0.00014557	0.02184	1903
1:51109269	1:51203924	0.00014531	0.07713	1903
1:51109269	1:51314917	0.00014474	0.2111	1903
1:51109269	1:50958949	0.00014471	0.04647	1903
1:51109269	1:51765468	0.00014449	0.04226	1903
1:51109269	1:51281418	0.00014372	0.06047	1903
1:51109269	1:51768410	0.00014344	0.04304	1903
1:51109269	1:51221165	0.00014298	0.0187	1903
1:51109269	1:51710120	0.0001423	0.112	1903
1:51109269	1:51418016	0.00014108	0.1048	1903
1:51109269	1:51589653	0.00014086	0.04013	1903
1:51109269	1:51554017	0.00014085	0.04263	1903
1:51109269	1:51552838	0.00014085	0.04271	1903
1:51109269	1:51619835	0.00014065	0.2421	1903
1:51109269	1:50822841	0.00014033	0.1093	1903
1:51109269	1:51365255	0.00013966	0.2063	1903
1:51109269	1:51388869	0.00013958	0.2065	1903
1:51109269	1:51185035	0.0001395	0.1908	1903
1:51109269	1:51452017	0.00013857	0.06457	1903
1:51109269	1:51768716	0.00013829	0.04486	1903
1:51109269	1:50844197	0.00013813	0.05472	1903
1:51109269	1:51071587	0.00013655	0.1516	1903
1:51109269	1:51554755	0.00013563	0.04421	1903
1:51109269	1:51131367	0.00013499	0.0202	1903
1:51109269	1:51003687	0.00013473	0.1287	1903
1:51109269	1:50844998	0.00013454	0.05484	1903
1:51109269	1:51037107	0.000134	0.2208	1903
1:51109269	1:51554925	0.00013354	0.0452	1903
1:51109269	1:51769286	0.00013322	0.1263	1903
1:51109269	1:51533430	0.00013275	0.1048	1903
1:51109269	1:51228675	0.00013274	0.115	1903
1:51109269	1:51558119	0.00013261	0.04545	1903
1:51109269	1:51533559	0.0001324	0.1049	1903
1:51109269	1:51564034	0.00013163	0.04589	1903
1:51109269	1:51562786	0.00013163	0.04591	1903
1:51109269	1:51562762	0.00013163	0.04591	1903
1:51109269	1:51561370	0.00013163	0.04574	1903
1:51109269	1:51569624	0.00013163	0.04588	1903
1:51109269	1:51518613	0.00013074	0.2518	1903
1:51109269	1:51564853	0.00013065	0.04614	1903
1:51109269	1:51568124	0.00013065	0.04617	1903
1:51109269	1:51567474	0.00013065	0.0462	1903
1:51109269	1:51237236	0.00013064	0.2603	1903
1:51109269	1:51122643	0.00013058	0.2154	1903
1:51109269	1:51634109	0.00013046	0.1105	1903
1:51109269	1:51189588	0.00013042	0.07252	1903
1:51109269	1:51575814	0.00013039	0.1921	1903
1:51109269	1:51114676	0.00013035	0.1352	1903
1:51109269	1:50934124	0.00012988	0.0313	1903
1:51109269	1:51549253	0.00012968	0.04682	1903
1:51109269	1:51571122	0.00012968	0.04665	1903
1:51109269	1:51566686	0.00012968	0.04669	1903
1:51109269	1:51772012	0.0001296	0.2609	1903
1:51109269	1:51776245	0.00012959	0.04837	1903
1:51109269	1:51776342	0.00012959	0.04836	1903
1:51109269	1:51518615	0.00012917	0.2678	1903
1:51109269	1:50936986	0.00012915	0.2091	1903
1:51109269	1:51366384	0.0001291	0.2189	1903
1:51109269	1:51507643	0.00012886	0.2682	1903
1:51109269	1:51405693	0.00012885	0.2198	1903
1:51109269	1:51560839	0.00012872	0.0472	1903
1:51109269	1:51283888	0.00012862	0.213	1903
1:51109269	1:51030876	0.00012818	0.09213	1903
1:51109269	1:51103268	0.0001281	0.02173	1903
1:51109269	1:51632263	0.00012653	0.1473	1903
1:51109269	1:51632240	0.00012653	0.1474	1903
1:51109269	1:51710838	0.00012612	0.2717	1903
1:51109269	1:50986910	0.00012589	0.1409	1903
1:51109269	1:51706651	0.00012577	0.2735	1903
1:51109269	1:51150159	0.00012544	0.2315	1903
1:51109269	1:51248534	0.00012484	0.214	1903
1:51109269	1:50984993	0.00012468	0.1721	1903
1:51109269	1:51555873	0.00012464	0.04088	1903
1:51109269	1:51212473	0.00012459	0.2337	1903
1:51109269	1:51489371	0.00012426	0.1975	1903
1:51109269	1:51759251	0.00012423	0.3585	1903
1:51109269	1:50875778	0.00012412	0.02728	1903
1:51109269	1:51762781	0.00012362	0.1404	1903
1:51109269	1:51110698	0.00012343	0.1799	1903
1:51109269	1:51762620	0.00012339	0.1407	1903
1:51109269	1:50838655	0.00012306	0.2011	1903
1:51109269	1:51229246	0.0001226	0.2626	1903
1:51109269	1:51066950	0.00012239	0.03119	1903
1:51109269	1:51126910	0.00012234	0.2433	1903
1:51109269	1:51501770	0.00012202	0.2967	1903
1:51109269	1:51335025	0.00012133	0.268	1903
1:51109269	1:51724239	0.00012129	0.3868	1903
1:51109269	1:50845118	0.00012119	0.1783	1903
1:51109269	1:51198637	0.00012116	0.1105	1903
1:51109269	1:50841209	0.00012106	0.3211	1903
1:51109269	1:51624085	0.00012085	0.2554	1903
1:51109269	1:51072393	0.00012064	0.2796	1903
1:51109269	1:51263097	0.00012046	0.2404	1903
1:51109269	1:51314018	0.00011962	0.02278	1903
1:51109269	1:51770255	0.0001196	0.1852	1903
1:51109269	1:51426916	0.00011932	0.273	1903
1:51109269	1:51205007	0.00011928	0.2544	1903
1:51109269	1:51178931	0.00011919	0.2123	1903
1:51109269	1:51333205	0.00011867	0.2572	1903
1:51109269	1:50960596	0.00011846	0.4613	1903
1:51109269	1:51626457	0.00011781	0.2148	1903
1:51109269	1:51086624	0.00011764	0.11	1903
1:51109269	1:50880176	0.00011759	0.1659	1903
1:51109269	1:50933922	0.00011757	0.4733	1903
1:51109269	1:51353519	0.00011754	0.1217	1903
1:51109269	1:50916390	0.00011736	0.4761	1903
1:51109269	1:51688361	0.00011734	0.1988	1903
1:51109269	1:51550357	0.00011733	0.2281	1903
1:51109269	1:51240213	0.00011732	0.1646	1903
1:51109269	1:51745937	0.00011704	0.328	1903
1:51109269	1:51390644	0.00011677	0.1318	1903
1:51109269	1:51696988	0.00011634	0.1451	1903
1:51109269	1:51107503	0.00011605	0.1519	1903
1:51109269	1:51054008	0.00011604	0.2796	1903
1:51109269	1:51272405	0.00011519	0.1072	1903
1:51109269	1:51532541	0.00011503	0.2548	1903
1:51109269	1:51178202	0.00011481	0.09348	1903
1:51109269	1:51285461	0.00011446	0.02716	1903
1:51109269	1:50929508	0.00011422	0.2007	1903
1:51109269	1:50824281	0.00011418	0.04306	1903
1:51109269	1:51767352	0.00011392	0.03808	1903
1:51109269	1:51008923	0.00011289	0.2199	1903
1:51109269	1:51131984	0.00011258	0.3023	1903
1:51109269	1:51535380	0.00011248	0.05707	1903
1:51109269	1:51507553	0.00011187	0.2486	1903
1:51109269	1:51448987	0.00011181	0.4912	1903
1:51109269	1:50926203	0.00011178	0.167	1903
1:51109269	1:51739801	0.0001117	0.05713	1903
1:51109269	1:51518766	0.00011167	0.2701	1903
1:51109269	1:51194706	0.00011152	0.03004	1903
1:51109269	1:51105555	0.00011132	0.1974	1903
1:51109269	1:51359536	0.00011117	0.2878	1903
1:51109269	1:51727383	0.00011117	0.06026	1903
1:51109269	1:51439456	0.00011115	0.1901	1903
1:51109269	1:51536008	0.00011017	0.05842	1903
1:51109269	1:50877128	0.00011014	0.6342	1903
1:51109269	1:51235000	0.00011014	0.2923	1903
1:51109269	1:51713215	0.00010959	0.321	1903
1:51109269	1:51130191	0.00010949	0.03495	1903
1:51109269	1:51738156	0.00010943	0.1581	1903
1:51109269	1:51269444	0.00010921	0.4438	1903
1:51109269	1:51033825	0.00010913	0.2939	1903
1:51109269	1:51433160	0.00010912	0.231	1903
1:51109269	1:51712970	0.00010901	0.0617	1903
1:51109269	1:51309468	0.00010894	0.4464	1903
1:51109269	1:51312836	0.00010894	0.4465	1903
1:51109269	1:51249263	0.00010884	0.4512	1903
1:51109269	1:50845282	0.00010876	0.6739	1903
1:51109269	1:50852210	0.00010872	0.3323	1903
1:51109269	1:50835405	0.00010869	0.6753	1903
1:51109269	1:51378765	0.00010856	0.4413	1903
1:51109269	1:51537657	0.00010842	0.1904	1903
1:51109269	1:51756908	0.00010838	0.089	1903
1:51109269	1:51525853	0.00010822	0.3185	1903
1:51109269	1:51031138	0.00010811	0.2965	1903
1:51109269	1:51768960	0.00010805	0.3715	1903
1:51109269	1:51103378	0.00010786	0.07694	1903
1:51109269	1:51704077	0.00010755	0.3274	1903
1:51109269	1:51301960	0.0001074	0.08415	1903
1:51109269	1:51221001	0.00010737	0.4647	1903
1:51109269	1:51466193	0.00010732	0.2946	1903
1:51109269	1:51701584	0.00010711	0.2148	1903
1:51109269	1:51084523	0.00010711	0.2092	1903
1:51109269	1:51482354	0.00010695	0.2997	1903
1:51109269	1:51293463	0.0001066	0.045	1903
1:51109269	1:50884536	0.00010635	0.1798	1903
1:51109269	1:50934758	0.00010625	0.4031	1903
1:51109269	1:51105103	0.00010624	0.4434	1903
1:51109269	1:51331609	0.00010606	0.1174	1903
1:51109269	1:51263905	0.00010599	0.4845	1903
1:51109269	1:51347065	0.00010589	0.241	1903
1:51109269	1:51152632	0.00010563	0.3551	1903
1:51109269	1:51192182	0.00010553	0.3561	1903
1:51109269	1:51537371	0.000105	0.0618	1903
1:51109269	1:50843935	0.00010486	0.3483	1903
1:51109269	1:51581486	0.00010481	0.06187	1903
1:51109269	1:51312220	0.00010433	0.2481	1903
1:51109269	1:51325557	0.00010433	0.322	1903
1:51109269	1:51555983	0.000104	0.06398	1903
1:51109269	1:51537957	0.00010358	0.06325	1903
1:51109269	1:51576633	0.00010338	0.06284	1903
1:51109269	1:51547944	0.00010291	0.09337	1903
1:51109269	1:51638634	0.00010232	0.05034	1903
1:51109269	1:51697627	0.00010197	0.06381	1903
1:51109269	1:51205246	0.00010195	0.5422	1903
1:51109269	1:51355342	0.00010191	0.0847	1903
1:51109269	1:51260931	0.00010181	0.5149	1903
1:51109269	1:51448311	0.0001018	0.1631	1903
1:51109269	1:50983169	0.00010164	0.4412	1903
1:51109269	1:51231865	0.00010164	0.3384	1903
1:51109269	1:51054570	0.00010163	0.04764	1903
1:51109269	1:51597985	0.00010152	0.06391	1903
1:51109269	1:50985314	0.0001015	0.443	1903
1:51109269	1:51750685	0.00010132	0.3549	1903
1:51109269	1:51611227	0.0001011	0.05238	1903
1:51109269	1:51643669	0.00010105	0.05874	1903
1:51109269	1:50875293	0.00010101	0.5688	1903
1:51109269	1:51623154	0.00010022	0.06824	1903
1:51109269	1:50939107	9.986e-05	0.4808	1903
1:51109269	1:51695740	9.98e-05	0.3948	1903
1:51109269	1:51436365	9.966e-05	0.4366	1903
1:51109269	1:51591725	9.946e-05	0.06553	1903
1:51109269	1:51754619	9.946e-05	0.3961	1903
1:51109269	1:51775963	9.942e-05	0.5216	1903
1:51109269	1:51000031	9.94e-05	0.7717	1903
1:51109269	1:51694602	9.92e-05	0.06966	1903
1:51109269	1:50857767	9.913e-05	0.2258	1903
1:51109269	1:51616833	9.901e-05	0.06571	1903
1:51109269	1:51610351	9.879e-05	0.0654	1903
1:51109269	1:51205168	9.878e-05	0.4923	1903
1:51109269	1:51642654	9.869e-05	0.5257	1903
1:51109269	1:51693337	9.857e-05	0.07001	1903
1:51109269	1:51611515	9.812e-05	0.06586	1903
1:51109269	1:51555151	9.794e-05	0.4655	1903
1:51109269	1:50895071	9.773e-05	0.8613	1903
1:51109269	1:51294144	9.754e-05	0.2293	1903
1:51109269	1:51022291	9.751e-05	0.5763	1903
1:51109269	1:51546523	9.748e-05	0.8289	1903
1:51109269	1:51583835	9.746e-05	0.06759	1903
1:51109269	1:51105156	9.736e-05	0.3015	1903
1:51109269	1:51307131	9.729e-05	0.8537	1903
1:51109269	1:51414268	9.713e-05	0.2391	1903
1:51109269	1:51168684	9.699e-05	0.0507	1903
1:51109269	1:51200319	9.684e-05	0.3199	1903
1:51109269	1:51348478	9.671e-05	0.2001	1903
1:51109269	1:51023291	9.666e-05	0.5646	1903
1:51109269	1:51037129	9.666e-05	0.5649	1903
1:51109269	1:51621908	9.659e-05	0.1997	1903
1:51109269	1:51605804	9.635e-05	0.06835	1903
1:51109269	1:51604265	9.635e-05	0.06788	1903
1:51109269	1:51578679	9.617e-05	0.4355	1903
1:51109269	1:51589492	9.615e-05	0.06803	1903
1:51109269	1:51421164	9.602e-05	0.4072	1903
1:51109269	1:51568724	9.584e-05	0.3947	1903
1:51109269	1:51478150	9.582e-05	0.3796	1903
1:51109269	1:51677989	9.573e-05	0.2543	1903
1:51109269	1:51544154	9.572e-05	0.3524	1903
1:51109269	1:51336053	9.567e-05	0.1792	1903
1:51109269	1:51274458	9.557e-05	0.3729	1903
1:51109269	1:51673209	9.551e-05	0.0691	1903
1:51109269	1:51630540	9.549e-05	0.9796	1903
1:51109269	1:51310634	9.542e-05	0.5012	1903
1:51109269	1:51546383	9.537e-05	0.8999	1903
1:51109269	1:51542478	9.532e-05	0.6163	1903
1:51109269	1:51324192	9.521e-05	0.272	1903
1:51109269	1:51075345	9.488e-05	0.3559	1903
1:51109269	1:51549214	9.46e-05	0.8157	1903
1:51109269	1:51225684	9.452e-05	0.5128	1903
1:51109269	1:51615719	9.442e-05	0.06983	1903
1:51109269	1:51150599	9.442e-05	0.2098	1903
1:51109269	1:51509726	9.441e-05	0.8971	1903
1:51109269	1:51540607	9.432e-05	0.07027	1903
1:51109269	1:51688527	9.417e-05	0.7093	1903
1:51109269	1:50866389	9.394e-05	0.2244	1903
1:51109269	1:51763879	9.385e-05	0.06757	1903
1:51109269	1:51498951	9.358e-05	0.7473	1903
1:51109269	1:51401485	9.349e-05	0.5976	1903
1:51109269	1:51400727	9.341e-05	0.161	1903
1:51109269	1:51481805	9.338e-05	0.5656	1903
1:51109269	1:51481687	9.331e-05	0.5667	1903
1:51109269	1:51424610	9.328e-05	0.3769	1903
1:51109269	1:51467304	9.292e-05	0.2147	1903
1:51109269	1:50871492	9.278e-05	0.4259	1903
1:51109269	1:51479802	9.265e-05	0.5777	1903
1:51109269	1:51538317	9.263e-05	0.4052	1903
1:51109269	1:51618878	9.254e-05	0.07149	1903
1:51109269	1:51732434	9.243e-05	0.605	1903
1:51109269	1:50842158	9.239e-05	0.9292	1903
1:51109269	1:51512100	9.236e-05	0.6487	1903
1:51109269	1:51730989	9.233e-05	0.2821	1903
1:51109269	1:51438266	9.232e-05	0.3848	1903
1:51109269	1:51637303	9.225e-05	0.2277	1903
1:51109269	1:51202155	9.222e-05	0.3511	1903
1:51109269	1:50857752	9.206e-05	0.9306	1903
1:51109269	1:50810014	9.199e-05	0.1851	1903
1:51109269	1:51489644	9.196e-05	0.6046	1903
1:51109269	1:51456423	9.167e-05	0.7213	1903
1:51109269	1:51477758	9.157e-05	0.5954	1903
1:51109269	1:50847604	9.156e-05	0.08813	1903
1:51109269	1:51477367	9.148e-05	0.5966	1903
1:51109269	1:51201272	9.143e-05	0.261	1903
1:51109269	1:51526969	9.135e-05	0.7243	1903
1:51109269	1:51626511	9.131e-05	0.07289	1903
1:51109269	1:51052241	9.125e-05	0.2206	1903
1:51109269	1:51299014	9.123e-05	0.245	1903
1:51109269	1:51227935	9.123e-05	0.7189	1903
1:51109269	1:51771436	9.107e-05	0.733	1903
1:51109269	1:51474132	9.097e-05	0.6995	1903
1:51109269	1:50852451	9.083e-05	0.372	1903
1:51109269	1:51517676	9.079e-05	0.7083	1903
1:51109269	1:51614545	9.057e-05	0.8318	1903
1:51109269	1:51497673	9.046e-05	0.6433	1903
1:51109269	1:51498966	9.045e-05	0.6445	1903
1:51109269	1:51744974	9.03e-05	0.4832	1903
1:51109269	1:50858714	9.028e-05	0.4059	1903
1:51109269	1:51523011	9.014e-05	0.9997	1903
1:51109269	1:51628012	9.011e-05	0.07439	1903
1:51109269	1:51505977	8.974e-05	0.9944	1903
1:51109269	1:50983572	8.972e-05	0.3129	1903
1:51109269	1:51634704	8.957e-05	0.5592	1903
1:51109269	1:51242637	8.952e-05	0.7532	1903
1:51109269	1:51376826	8.949e-05	0.8529	1903
1:51109269	1:51761563	8.944e-05	0.7843	1903
1:51109269	1:51358129	8.944e-05	0.8518	1903
1:51109269	1:51652375	8.936e-05	0.07409	1903
1:51109269	1:51534531	8.932e-05	0.7309	1903
1:51109269	1:51763957	8.925e-05	0.7822	1903
1:51109269	1:50996923	8.913e-05	0.4029	1903
1:51109269	1:51553579	8.91e-05	0.4638	1903
1:51109269	1:51477276	8.907e-05	0.6519	1903
1:51109269	1:51628722	8.892e-05	0.07507	1903
1:51109269	1:51622697	8.892e-05	0.0751	1903
1:51109269	1:51731906	8.868e-05	0.4206	1903
1:51109269	1:51604474	8.841e-05	0.6308	1903
1:51109269	1:51629837	8.834e-05	0.07617	1903
1:51109269	1:51629420	8.834e-05	0.07577	1903
1:51109269	1:51511165	8.773e-05	0.6431	1903
1:51109269	1:50812284	8.763e-05	0.07286	1903
1:51109269	1:51713423	8.749e-05	0.2244	1903
1:51109269	1:51759043	8.749e-05	0.3023	1903
1:51109269	1:51413314	8.727e-05	0.6783	1903
1:51109269	1:51434863	8.714e-05	0.9945	1903
1:51109269	1:51430583	8.707e-05	0.9957	1903
1:51109269	1:51654503	8.705e-05	0.07659	1903
1:51109269	1:51653911	8.705e-05	0.07688	1903
1:51109269	1:51654504	8.705e-05	0.07667	1903
1:51109269	1:51145873	8.682e-05	0.8433	1903
1:51109269	1:50899182	8.668e-05	0.2581	1903
1:51109269	1:51214951	8.667e-05	0.3777	1903
1:51109269	1:51074532	8.647e-05	0.982	1903
1:51109269	1:51183706	8.628e-05	0.7256	1903
1:51109269	1:51157355	8.621e-05	0.9509	1903
1:51109269	1:51186633	8.618e-05	0.9939	1903
1:51109269	1:50859103	8.617e-05	0.3262	1903
1:51109269	1:51234476	8.615e-05	0.9863	1903
1:51109269	1:51212739	8.604e-05	0.2514	1903
1:51109269	1:51044928	8.594e-05	0.1607	1903
1:51109269	1:51048102	8.594e-05	0.1607	1903
1:51109269	1:51651828	8.592e-05	0.07816	1903
1:51109269	1:51472012	8.588e-05	0.5435	1903
1:51109269	1:51585052	8.587e-05	0.06363	1903
1:51109269	1:51462453	8.569e-05	0.4196	1903
1:51109269	1:51265096	8.563e-05	0.2541	1903
1:51109269	1:51759989	8.556e-05	0.7223	1903
1:51109269	1:50941101	8.548e-05	0.6014	1903
1:51109269	1:51650336	8.537e-05	0.07888	1903
1:51109269	1:50847558	8.533e-05	0.09392	1903
1:51109269	1:51416829	8.51e-05	0.6416	1903
1:51109269	1:51332456	8.501e-05	0.4241	1903
1:51109269	1:50893408	8.498e-05	0.418	1903
1:51109269	1:51358095	8.492e-05	0.7709	1903
1:51109269	1:50905055	8.48e-05	0.5994	1903
1:51109269	1:51508372	8.447e-05	0.4042	1903
1:51109269	1:50818263	8.437e-05	0.3585	1903
1:51109269	1:51648876	8.427e-05	0.07991	1903
1:51109269	1:51308871	8.424e-05	0.7632	1903
1:51109269	1:51134281	8.397e-05	0.7495	1903
1:51109269	1:51565389	8.396e-05	0.1076	1903
1:51109269	1:51676948	8.39e-05	0.6653	1903
1:51109269	1:51660678	8.374e-05	0.842	1903
1:51109269	1:51647894	8.373e-05	0.08061	1903
1:51109269	1:50889151	8.371e-05	0.1819	1903
1:51109269	1:51397415	8.364e-05	0.4683	1903
1:51109269	1:51397801	8.364e-05	0.4684	1903
1:51109269	1:51394324	8.364e-05	0.4685	1903
1:51109269	1:51002307	8.352e-05	0.4328	1903
1:51109269	1:51219511	8.346e-05	0.3599	1903
1:51109269	1:51185830	8.339e-05	0.4718	1903
1:51109269	1:51356652	8.339e-05	0.6808	1903
1:51109269	1:50949086	8.337e-05	0.6222	1903
1:51109269	1:51007085	8.332e-05	0.6421	1903
1:51109269	1:51565200	8.331e-05	0.8542	1903
1:51109269	1:51556352	8.328e-05	0.6614	1903
1:51109269	1:51318006	8.322e-05	0.1503	1903
1:51109269	1:51646922	8.319e-05	0.08139	1903
1:51109269	1:51226654	8.314e-05	0.5496	1903
1:51109269	1:51350600	8.307e-05	0.4764	1903
1:51109269	1:51492746	8.307e-05	0.5336	1903
1:51109269	1:51634832	8.276e-05	0.0822	1903
1:51109269	1:51637104	8.276e-05	0.08245	1903
1:51109269	1:51637955	8.276e-05	0.08248	1903
1:51109269	1:50931637	8.265e-05	0.7069	1903
1:51109269	1:51766490	8.262e-05	0.07768	1903
1:51109269	1:51490418	8.241e-05	0.1649	1903
1:51109269	1:50998621	8.236e-05	0.6646	1903
1:51109269	1:50972610	8.202e-05	0.7435	1903
1:51109269	1:50998574	8.201e-05	0.7682	1903
1:51109269	1:51719414	8.192e-05	0.8649	1903
1:51109269	1:50974282	8.188e-05	0.7508	1903
1:51109269	1:51163616	8.185e-05	0.2112	1903
1:51109269	1:51143592	8.183e-05	0.3407	1903
1:51109269	1:51205563	8.18e-05	0.9138	1903
1:51109269	1:51653998	8.17e-05	0.0837	1903
1:51109269	1:51143608	8.162e-05	0.7808	1903
1:51109269	1:51234531	8.156e-05	0.7817	1903
1:51109269	1:50818044	8.149e-05	0.3691	1903
1:51109269	1:51525227	8.149e-05	0.5849	1903
1:51109269	1:51582475	8.141e-05	0.7461	1903
1:51109269	1:51159302	8.141e-05	0.4004	1903
1:51109269	1:51348881	8.132e-05	0.5944	1903
1:51109269	1:51508312	8.117e-05	0.1875	1903
1:51109269	1:50930264	8.117e-05	0.06265	1903
1:51109269	1:51397643	8.064e-05	0.1669	1903
1:51109269	1:51329359	8.063e-05	0.4619	1903
1:51109269	1:50884749	8.047e-05	0.3448	1903
1:51109269	1:50871575	8.034e-05	0.04803	1903
1:51109269	1:51600770	8.03e-05	0.6308	1903
1:51109269	1:51209947	8.016e-05	0.5186	1903
1:51109269	1:51614646	8.007e-05	0.9339	1903
1:51109269	1:50844125	8.004e-05	0.4226	1903
1:51109269	1:51388370	7.985e-05	0.7954	1903
1:51109269	1:51582561	7.977e-05	0.4353	1903
1:51109269	1:51187134	7.977e-05	0.5254	1903
1:51109269	1:51178550	7.969e-05	0.5265	1903
1:51109269	1:51197135	7.939e-05	0.3929	1903
1:51109269	1:51765005	7.922e-05	0.6083	1903
1:51109269	1:51634613	7.913e-05	0.08629	1903
1:51109269	1:51176509	7.906e-05	0.5906	1903
1:51109269	1:51175633	7.9e-05	0.6799	1903
1:51109269	1:50847862	7.897e-05	0.5015	1903
1:51109269	1:51025948	7.893e-05	0.3361	1903
1:51109269	1:51553863	7.888e-05	0.4988	1903
1:51109269	1:50941040	7.859e-05	0.5471	1903
1:51109269	1:50939024	7.856e-05	0.5476	1903
1:51109269	1:51341695	7.852e-05	0.1607	1903
1:51109269	1:51280994	7.844e-05	0.6779	1903
1:51109269	1:51063734	7.844e-05	0.5441	1903
1:51109269	1:50928822	7.829e-05	0.5516	1903
1:51109269	1:50922641	7.829e-05	0.5524	1903
1:51109269	1:51721717	7.825e-05	0.5353	1903
1:51109269	1:50910539	7.823e-05	0.6192	1903
1:51109269	1:50918806	7.82e-05	0.6201	1903
1:51109269	1:51375880	7.813e-05	0.6813	1903
1:51109269	1:51077379	7.804e-05	0.9361	1903
1:51109269	1:50898476	7.802e-05	0.6234	1903
1:51109269	1:51767558	7.801e-05	0.09987	1903
1:51109269	1:51058650	7.771e-05	0.9438	1903
1:51109269	1:51556705	7.758e-05	0.6189	1903
1:51109269	1:51710059	7.756e-05	0.6099	1903
1:51109269	1:51633716	7.712e-05	0.9536	1903
1:51109269	1:51147526	7.708e-05	0.4535	1903
1:51109269	1:51642429	7.704e-05	0.9797	1903
1:51109269	1:51642770	7.7e-05	0.9775	1903
1:51109269	1:51676073	7.691e-05	0.66	1903
1:51109269	1:50914044	7.676e-05	0.2832	1903
1:51109269	1:50901608	7.675e-05	0.5798	1903
1:51109269	1:51631626	7.675e-05	0.7439	1903
1:51109269	1:50931196	7.67e-05	0.4076	1903
1:51109269	1:50898984	7.664e-05	0.5831	1903
1:51109269	1:51257892	7.655e-05	0.4106	1903
1:51109269	1:51386968	7.655e-05	0.4454	1903
1:51109269	1:51134032	7.648e-05	0.4804	1903
1:51109269	1:51231031	7.631e-05	0.9427	1903
1:51109269	1:51275913	7.627e-05	0.453	1903
1:51109269	1:51599448	7.626e-05	0.955	1903
1:51109269	1:51057462	7.608e-05	0.6955	1903
1:51109269	1:50909377	7.605e-05	0.4148	1903
1:51109269	1:51370958	7.599e-05	0.0973	1903
1:51109269	1:51325215	7.586e-05	0.4543	1903
1:51109269	1:50814503	7.56e-05	0.628	1903
1:51109269	1:51181697	7.558e-05	0.8143	1903
1:51109269	1:51150341	7.555e-05	0.8109	1903
1:51109269	1:51126319	7.55e-05	0.8493	1903
1:51109269	1:51130860	7.548e-05	0.8098	1903
1:51109269	1:51600062	7.546e-05	0.7526	1903
1:51109269	1:51194992	7.538e-05	0.1751	1903
1:51109269	1:51206602	7.529e-05	0.7422	1903
1:51109269	1:51111570	7.515e-05	0.8034	1903
1:51109269	1:51129500	7.515e-05	0.3571	1903
1:51109269	1:51435379	7.513e-05	0.8942	1903
1:51109269	1:51689204	7.51e-05	0.6816	1903
1:51109269	1:51693114	7.51e-05	0.6831	1903
1:51109269	1:51233343	7.502e-05	0.08083	1903
1:51109269	1:51507312	7.493e-05	0.9631	1903
1:51109269	1:51318234	7.491e-05	0.899	1903
1:51109269	1:51084065	7.475e-05	0.6763	1903
1:51109269	1:51585227	7.47e-05	0.08733	1903
1:51109269	1:51283868	7.453e-05	0.4707	1903
1:51109269	1:51065394	7.446e-05	0.6824	1903
1:51109269	1:51594929	7.435e-05	0.08714	1903
1:51109269	1:51584962	7.429e-05	0.5842	1903
1:51109269	1:50881485	7.417e-05	0.6543	1903
1:51109269	1:51265722	7.414e-05	0.6168	1903
1:51109269	1:51419133	7.398e-05	0.7872	1903
1:51109269	1:51235086	7.396e-05	0.506	1903
1:51109269	1:51390371	7.387e-05	0.6465	1903
1:51109269	1:51527528	7.382e-05	0.9873	1903
1:51109269	1:51276544	7.375e-05	0.6493	1903
1:51109269	1:51532300	7.368e-05	0.4497	1903
1:51109269	1:51292624	7.329e-05	0.3334	1903
1:51109269	1:51149861	7.327e-05	0.5393	1903
1:51109269	1:51352284	7.318e-05	0.3373	1903
1:51109269	1:51752004	7.31e-05	0.4043	1903
1:51109269	1:51352780	7.309e-05	0.46	1903
1:51109269	1:50879299	7.307e-05	0.3287	1903
1:51109269	1:51046694	7.3e-05	0.9964	1903
1:51109269	1:51616183	7.3e-05	0.08813	1903
1:51109269	1:51560077	7.294e-05	0.5287	1903
1:51109269	1:51743110	7.284e-05	0.4632	1903
1:51109269	1:51003411	7.277e-05	0.6233	1903
1:51109269	1:51590936	7.275e-05	0.3756	1903
1:51109269	1:51150672	7.27e-05	0.5032	1903
1:51109269	1:51250063	7.266e-05	0.6835	1903
1:51109269	1:51618573	7.25e-05	0.08864	1903
1:51109269	1:51619809	7.25e-05	0.08893	1903
1:51109269	1:51619900	7.25e-05	0.08886	1903
1:51109269	1:51212746	7.246e-05	0.2484	1903
1:51109269	1:51116736	7.244e-05	0.0744	1903
1:51109269	1:51172691	7.24e-05	0.7126	1903
1:51109269	1:51570046	7.211e-05	0.06232	1903
1:51109269	1:51417959	7.207e-05	0.8192	1903
1:51109269	1:51692811	7.194e-05	0.5453	1903
1:51109269	1:51586945	7.189e-05	0.09104	1903
1:51109269	1:51598023	7.164e-05	0.8319	1903
1:51109269	1:51220482	7.152e-05	0.5691	1903
1:51109269	1:51564991	7.133e-05	0.04361	1903
1:51109269	1:51311657	7.126e-05	0.9022	1903
1:51109269	1:51315637	7.124e-05	0.9034	1903
1:51109269	1:51002955	7.122e-05	0.8318	1903
1:51109269	1:51000111	7.122e-05	0.4309	1903
1:51109269	1:51737503	7.112e-05	0.8053	1903
1:51109269	1:51624437	7.105e-05	0.09077	1903
1:51109269	1:51610533	7.105e-05	0.09091	1903
1:51109269	1:51175247	7.103e-05	0.5804	1903
1:51109269	1:51592974	7.099e-05	0.09192	1903
1:51109269	1:50864021	7.095e-05	0.05307	1903
1:51109269	1:51736083	7.093e-05	0.7895	1903
1:51109269	1:51371371	7.088e-05	0.6592	1903
1:51109269	1:51371374	7.088e-05	0.6593	1903
1:51109269	1:51221608	7.073e-05	0.9489	1903
1:51109269	1:51160445	7.06e-05	0.5009	1903
1:51109269	1:51615912	7.057e-05	0.09194	1903
1:51109269	1:51606983	7.057e-05	0.09183	1903
1:51109269	1:51541808	7.047e-05	0.0744	1903
1:51109269	1:51447002	7.034e-05	0.7977	1903
1:51109269	1:50941073	7.034e-05	0.7629	1903
1:51109269	1:51657346	7.025e-05	0.5869	1903
1:51109269	1:51334524	7.014e-05	0.9063	1903
1:51109269	1:50865101	7.009e-05	0.05437	1903
1:51109269	1:50854264	6.994e-05	0.8562	1903
1:51109269	1:51065903	6.992e-05	0.5159	1903
1:51109269	1:50968306	6.98e-05	0.405	1903
1:51109269	1:50999313	6.977e-05	0.9258	1903
1:51109269	1:51074360	6.973e-05	0.5998	1903
1:51109269	1:51015407	6.967e-05	0.4829	1903
1:51109269	1:51584465	6.966e-05	0.4816	1903
1:51109269	1:51307132	6.966e-05	0.8681	1903
1:51109269	1:50874830	6.959e-05	0.05509	1903
1:51109269	1:51123246	6.954e-05	0.925	1903
1:51109269	1:51477267	6.951e-05	0.3772	1903
1:51109269	1:51119340	6.93e-05	0.4291	1903
1:51109269	1:51693093	6.929e-05	0.8459	1903
1:51109269	1:51298205	6.923e-05	0.362	1903
1:51109269	1:51252031	6.9e-05	0.6308	1903
1:51109269	1:50966897	6.896e-05	0.08283	1903
1:51109269	1:51183930	6.884e-05	0.4372	1903
1:51109269	1:51636554	6.883e-05	0.09964	1903
1:51109269	1:51490716	6.874e-05	0.808	1903
1:51109269	1:50809747	6.868e-05	0.853	1903
1:51109269	1:51388950	6.867e-05	0.7459	1903
1:51109269	1:50860679	6.841e-05	0.05522	1903
1:51109269	1:50871536	6.841e-05	0.05526	1903
1:51109269	1:50874220	6.841e-05	0.05537	1903
1:51109269	1:51370856	6.836e-05	0.8106	1903
1:51109269	1:50820082	6.815e-05	0.6741	1903
1:51109269	1:50882506	6.806e-05	0.1452	1903
1:51109269	1:50986017	6.799e-05	0.5829	1903
1:51109269	1:51551610	6.79e-05	0.4466	1903
1:51109269	1:50818587	6.789e-05	0.2962	1903
1:51109269	1:51518178	6.783e-05	0.6724	1903
1:51109269	1:51644579	6.781e-05	0.09655	1903
1:51109269	1:51145267	6.768e-05	0.8317	1903
1:51109269	1:50811531	6.765e-05	0.9343	1903
1:51109269	1:50939762	6.764e-05	0.6894	1903
1:51109269	1:51397155	6.761e-05	0.8684	1903
1:51109269	1:51373055	6.75e-05	0.4476	1903
1:51109269	1:51073236	6.747e-05	0.4758	1903
1:51109269	1:51021648	6.711e-05	0.8261	1903
1:51109269	1:51628368	6.711e-05	0.3983	1903
1:51109269	1:50854466	6.678e-05	0.05751	1903
1:51109269	1:51127144	6.676e-05	0.9779	1903
1:51109269	1:50851392	6.658e-05	0.7431	1903
1:51109269	1:51747785	6.658e-05	0.6054	1903
1:51109269	1:51637522	6.648e-05	0.09873	1903
1:51109269	1:51640531	6.648e-05	0.09914	1903
1:51109269	1:51695913	6.633e-05	0.5921	1903
1:51109269	1:51576853	6.63e-05	0.2072	1903
1:51109269	1:51083975	6.626e-05	0.3606	1903
1:51109269	1:51356091	6.613e-05	0.1355	1903
1:51109269	1:51778862	6.596e-05	0.753	1903
1:51109269	1:51194419	6.592e-05	0.3964	1903
1:51109269	1:51259041	6.572e-05	0.08555	1903
1:51109269	1:51648608	6.561e-05	0.101	1903
1:51109269	1:51012924	6.55e-05	0.2603	1903
1:51109269	1:51608724	6.55e-05	0.745	1903
1:51109269	1:51395117	6.548e-05	0.4314	1903
1:51109269	1:51588565	6.546e-05	0.1056	1903
1:51109269	1:50865515	6.545e-05	0.3328	1903
1:51109269	1:51525592	6.533e-05	0.2105	1903
1:51109269	1:51604023	6.523e-05	0.1005	1903
1:51109269	1:51174330	6.517e-05	0.0479	1903
1:51109269	1:51058433	6.5e-05	0.9517	1903
1:51109269	1:51685328	6.493e-05	0.1275	1903
1:51109269	1:51692381	6.487e-05	0.6648	1903
1:51109269	1:51698933	6.459e-05	0.8046	1903
1:51109269	1:51696533	6.457e-05	0.8065	1903
1:51109269	1:51527640	6.451e-05	0.6747	1903
1:51109269	1:51147507	6.427e-05	0.4605	1903
1:51109269	1:51377314	6.399e-05	0.2356	1903
1:51109269	1:51590988	6.392e-05	0.9446	1903
1:51109269	1:51102201	6.388e-05	0.5943	1903
1:51109269	1:50937848	6.376e-05	0.05046	1903
1:51109269	1:51510083	6.374e-05	0.5046	1903
1:51109269	1:50876825	6.367e-05	0.0606	1903
1:51109269	1:51478767	6.366e-05	0.795	1903
1:51109269	1:51631884	6.351e-05	0.1048	1903
1:51109269	1:51635557	6.347e-05	0.1092	1903
1:51109269	1:51708495	6.342e-05	0.546	1903
1:51109269	1:51135737	6.341e-05	0.8103	1903
1:51109269	1:50826243	6.338e-05	0.9663	1903
1:51109269	1:51489312	6.331e-05	0.2563	1903
1:51109269	1:51580972	6.326e-05	0.9545	1903
1:51109269	1:51204557	6.318e-05	0.9496	1903
1:51109269	1:51043312	6.318e-05	0.2985	1903
1:51109269	1:51605924	6.316e-05	0.5658	1903
1:51109269	1:51126847	6.304e-05	0.9348	1903
1:51109269	1:51696642	6.294e-05	0.2518	1903
1:51109269	1:51648045	6.278e-05	0.4213	1903
1:51109269	1:51559225	6.276e-05	0.9126	1903
1:51109269	1:51160239	6.231e-05	0.9884	1903
1:51109269	1:51121902	6.205e-05	0.5465	1903
1:51109269	1:51585411	6.194e-05	0.7239	1903
1:51109269	1:51590900	6.193e-05	0.7222	1903
1:51109269	1:51590769	6.193e-05	0.7222	1903
1:51109269	1:51589324	6.189e-05	0.7244	1903
1:51109269	1:51589484	6.187e-05	0.7245	1903
1:51109269	1:51218131	6.183e-05	0.2867	1903
1:51109269	1:51289695	6.169e-05	0.984	1903
1:51109269	1:51155057	6.154e-05	0.8409	1903
1:51109269	1:51679791	6.152e-05	0.7034	1903
1:51109269	1:51719400	6.135e-05	0.399	1903
1:51109269	1:51679825	6.132e-05	0.5333	1903
1:51109269	1:50970648	6.132e-05	0.7912	1903
1:51109269	1:51679207	6.128e-05	0.5338	1903
1:51109269	1:51501841	6.119e-05	0.3129	1903
1:51109269	1:51233613	6.118e-05	0.7457	1903
1:51109269	1:51121244	6.116e-05	0.6026	1903
1:51109269	1:50878525	6.088e-05	0.87	1903
1:51109269	1:50973341	6.079e-05	0.3326	1903
1:51109269	1:51589618	6.07e-05	0.5444	1903
1:51109269	1:51044920	6.065e-05	0.6558	1903
1:51109269	1:51006601	6.062e-05	0.6571	1903
1:51109269	1:51659806	6.055e-05	0.7824	1903
1:51109269	1:51299376	6.054e-05	0.8482	1903
1:51109269	1:51482964	6.053e-05	0.8954	1903
1:51109269	1:51753811	6.052e-05	0.7967	1903
1:51109269	1:51592826	6.047e-05	0.7967	1903
1:51109269	1:51593646	6.047e-05	0.7968	1903
1:51109269	1:51592471	6.047e-05	0.7969	1903
1:51109269	1:51602374	6.045e-05	0.7971	1903
1:51109269	1:51595911	6.045e-05	0.7975	1903
1:51109269	1:51602409	6.045e-05	0.7972	1903
1:51109269	1:51602766	6.045e-05	0.7972	1903
1:51109269	1:51600344	6.045e-05	0.7971	1903
1:51109269	1:51597757	6.045e-05	0.7973	1903
1:51109269	1:51599719	6.045e-05	0.7972	1903
1:51109269	1:51599718	6.045e-05	0.7972	1903
1:51109269	1:50950330	6.044e-05	0.289	1903
1:51109269	1:51596865	6.044e-05	0.7978	1903
1:51109269	1:51595006	6.042e-05	0.7988	1903
1:51109269	1:51118670	6.042e-05	0.7298	1903
1:51109269	1:51592400	6.041e-05	0.7999	1903
1:51109269	1:51774860	6.041e-05	0.8	1903
1:51109269	1:51768512	6.038e-05	0.8051	1903
1:51109269	1:51604650	6.033e-05	0.8053	1903
1:51109269	1:51604725	6.03e-05	0.8063	1903
1:51109269	1:51604820	6.029e-05	0.8074	1903
1:51109269	1:51775191	6.027e-05	0.808	1903
1:51109269	1:51770147	6.027e-05	0.8122	1903
1:51109269	1:51768677	6.025e-05	0.814	1903
1:51109269	1:51768680	6.025e-05	0.814	1903
1:51109269	1:51605639	6.014e-05	0.817	1903
1:51109269	1:51163786	6.012e-05	0.5697	1903
1:51109269	1:51752104	6.012e-05	0.8187	1903
1:51109269	1:51760480	6.009e-05	0.8205	1903
1:51109269	1:51748161	6.009e-05	0.8205	1903
1:51109269	1:51749734	6.008e-05	0.8213	1903
1:51109269	1:51758266	6.007e-05	0.8224	1903
1:51109269	1:51214379	6.006e-05	0.2555	1903
1:51109269	1:51744006	6.006e-05	0.8229	1903
1:51109269	1:51757830	6.006e-05	0.8226	1903
1:51109269	1:51741205	6.006e-05	0.8233	1903
1:51109269	1:50870454	6.003e-05	0.06637	1903
1:51109269	1:51113441	6.002e-05	0.7129	1903
1:51109269	1:51735920	6.001e-05	0.8262	1903
1:51109269	1:51593084	5.998e-05	0.8097	1903
1:51109269	1:51739210	5.995e-05	0.8307	1903
1:51109269	1:50891635	5.995e-05	0.3644	1903
1:51109269	1:51730487	5.994e-05	0.8314	1903
1:51109269	1:51607349	5.993e-05	0.8364	1903
1:51109269	1:51153293	5.992e-05	0.2836	1903
1:51109269	1:51715777	5.988e-05	0.8356	1903
1:51109269	1:51711856	5.986e-05	0.8378	1903
1:51109269	1:51702424	5.979e-05	0.8429	1903
1:51109269	1:51663405	5.979e-05	0.8431	1903
1:51109269	1:51664887	5.978e-05	0.8436	1903
1:51109269	1:51700031	5.978e-05	0.8439	1903
1:51109269	1:51663733	5.978e-05	0.8434	1903
1:51109269	1:51664249	5.978e-05	0.8438	1903
1:51109269	1:51664534	5.977e-05	0.8442	1903
1:51109269	1:51696327	5.976e-05	0.8448	1903
1:51109269	1:51696793	5.976e-05	0.8449	1903
1:51109269	1:51687954	5.976e-05	0.8454	1903
1:51109269	1:51693063	5.976e-05	0.8456	1903
1:51109269	1:51665275	5.976e-05	0.845	1903
1:51109269	1:51693553	5.976e-05	0.8454	1903
1:51109269	1:51670814	5.975e-05	0.8463	1903
1:51109269	1:51665724	5.975e-05	0.8458	1903
1:51109269	1:51682823	5.974e-05	0.8472	1903
1:51109269	1:51667934	5.974e-05	0.8474	1903
1:51109269	1:51670155	5.973e-05	0.8476	1903
1:51109269	1:51675485	5.973e-05	0.8482	1903
1:51109269	1:51669443	5.973e-05	0.8476	1903
1:51109269	1:51682510	5.973e-05	0.8481	1903
1:51109269	1:51669833	5.973e-05	0.8476	1903
1:51109269	1:51668910	5.973e-05	0.8475	1903
1:51109269	1:51671815	5.973e-05	0.8476	1903
1:51109269	1:51667077	5.973e-05	0.848	1903
1:51109269	1:51673566	5.973e-05	0.8478	1903
1:51109269	1:51672069	5.973e-05	0.8476	1903
1:51109269	1:51669615	5.973e-05	0.8477	1903
1:51109269	1:51667701	5.971e-05	0.8487	1903
1:51109269	1:51659401	5.97e-05	0.1183	1903
1:51109269	1:51666358	5.969e-05	0.8559	1903
1:51109269	1:51657693	5.967e-05	0.8526	1903
1:51109269	1:51656958	5.967e-05	0.8527	1903
1:51109269	1:51658291	5.967e-05	0.8524	1903
1:51109269	1:51657200	5.967e-05	0.8526	1903
1:51109269	1:51657765	5.967e-05	0.8525	1903
1:51109269	1:51676107	5.958e-05	0.8552	1903
1:51109269	1:51676374	5.958e-05	0.8608	1903
1:51109269	1:51744215	5.956e-05	0.7915	1903
1:51109269	1:51744326	5.956e-05	0.7915	1903
1:51109269	1:51777408	5.954e-05	0.8504	1903
1:51109269	1:51609954	5.953e-05	0.8708	1903
1:51109269	1:51670573	5.952e-05	0.8663	1903
1:51109269	1:51776763	5.952e-05	0.8515	1903
1:51109269	1:51776341	5.952e-05	0.8518	1903
1:51109269	1:51711657	5.95e-05	0.5167	1903
1:51109269	1:51611371	5.945e-05	0.8838	1903
1:51109269	1:51430679	5.94e-05	0.531	1903
1:51109269	1:51611898	5.94e-05	0.8893	1903
1:51109269	1:51676536	5.929e-05	0.8669	1903
1:51109269	1:50965100	5.928e-05	0.5213	1903
1:51109269	1:51662012	5.927e-05	0.8859	1903
1:51109269	1:51614104	5.921e-05	0.914	1903
1:51109269	1:51646804	5.916e-05	0.9218	1903
1:51109269	1:51646315	5.916e-05	0.9229	1903
1:51109269	1:51646283	5.916e-05	0.9228	1903
1:51109269	1:51643710	5.916e-05	0.9232	1903
1:51109269	1:51647903	5.916e-05	0.9226	1903
1:51109269	1:51642730	5.915e-05	0.9239	1903
1:51109269	1:51650220	5.915e-05	0.9243	1903
1:51109269	1:51644840	5.914e-05	0.9258	1903
1:51109269	1:51639263	5.913e-05	0.9271	1903
1:51109269	1:51637381	5.913e-05	0.9275	1903
1:51109269	1:51638940	5.913e-05	0.9272	1903
1:51109269	1:51653092	5.913e-05	0.9284	1903
1:51109269	1:51653168	5.913e-05	0.9285	1903
1:51109269	1:51634679	5.912e-05	0.9292	1903
1:51109269	1:51636769	5.912e-05	0.9287	1903
1:51109269	1:51634768	5.912e-05	0.929	1903
1:51109269	1:51653363	5.912e-05	0.9287	1903
1:51109269	1:51634747	5.912e-05	0.929	1903
1:51109269	1:51631174	5.912e-05	0.93	1903
1:51109269	1:51631491	5.912e-05	0.9301	1903
1:51109269	1:51633365	5.912e-05	0.9298	1903
1:51109269	1:51633631	5.912e-05	0.9296	1903
1:51109269	1:51628353	5.911e-05	0.9307	1903
1:51109269	1:51628102	5.911e-05	0.9307	1903
1:51109269	1:51628998	5.911e-05	0.9306	1903
1:51109269	1:51639724	5.911e-05	0.9306	1903
1:51109269	1:51615768	5.911e-05	0.9309	1903
1:51109269	1:51624712	5.911e-05	0.9316	1903
1:51109269	1:51623984	5.911e-05	0.9319	1903
1:51109269	1:51625773	5.911e-05	0.9316	1903
1:51109269	1:51615538	5.911e-05	0.9317	1903
1:51109269	1:51625937	5.911e-05	0.9315	1903
1:51109269	1:51626060	5.911e-05	0.9314	1903
1:51109269	1:51424996	5.911e-05	0.8493	1903
1:51109269	1:51619980	5.91e-05	0.9329	1903
1:51109269	1:51628487	5.91e-05	0.9325	1903
1:51109269	1:51615966	5.91e-05	0.9329	1903
1:51109269	1:51615907	5.91e-05	0.9325	1903
1:51109269	1:51619097	5.91e-05	0.9331	1903
1:51109269	1:51618656	5.91e-05	0.9332	1903
1:51109269	1:51617510	5.91e-05	0.9336	1903
1:51109269	1:51616096	5.909e-05	0.9342	1903
1:51109269	1:51616536	5.909e-05	0.9353	1903
1:51109269	1:51616979	5.909e-05	0.935	1903
1:51109269	1:51655326	5.908e-05	0.9274	1903
1:51109269	1:51654060	5.907e-05	0.9291	1903
1:51109269	1:51654906	5.907e-05	0.9294	1903
1:51109269	1:51656403	5.906e-05	0.9296	1903
1:51109269	1:51655479	5.906e-05	0.9296	1903
1:51109269	1:51655726	5.906e-05	0.9297	1903
1:51109269	1:51087695	5.904e-05	0.3671	1903
1:51109269	1:51614015	5.887e-05	0.9652	1903
1:51109269	1:51666740	5.883e-05	0.933	1903
1:51109269	1:51653778	5.879e-05	0.9415	1903
1:51109269	1:50917216	5.876e-05	0.5445	1903
1:51109269	1:51305283	5.868e-05	0.7547	1903
1:51109269	1:51717033	5.867e-05	0.9805	1903
1:51109269	1:51757493	5.866e-05	0.9612	1903
1:51109269	1:51745102	5.863e-05	0.9726	1903
1:51109269	1:51745110	5.863e-05	0.9728	1903
1:51109269	1:51744943	5.863e-05	0.9722	1903
1:51109269	1:51746113	5.863e-05	0.9737	1903
1:51109269	1:51747181	5.863e-05	0.9738	1903
1:51109269	1:51748387	5.863e-05	0.9747	1903
1:51109269	1:51748861	5.863e-05	0.9751	1903
1:51109269	1:51748048	5.863e-05	0.9759	1903
1:51109269	1:51752245	5.863e-05	0.9773	1903
1:51109269	1:51754936	5.862e-05	0.9811	1903
1:51109269	1:51753394	5.861e-05	0.9844	1903
1:51109269	1:51753297	5.861e-05	0.9845	1903
1:51109269	1:51753292	5.861e-05	0.9845	1903
1:51109269	1:51756922	5.86e-05	0.9474	1903
1:51109269	1:51764993	5.858e-05	0.9732	1903
1:51109269	1:51764709	5.858e-05	0.9741	1903
1:51109269	1:51756519	5.857e-05	0.9755	1903
1:51109269	1:51604266	5.854e-05	0.9684	1903
1:51109269	1:51763817	5.852e-05	0.9734	1903
1:51109269	1:50968991	5.852e-05	0.08851	1903
1:51109269	1:51739544	5.85e-05	0.9079	1903
1:51109269	1:51699748	5.847e-05	0.9121	1903
1:51109269	1:51699644	5.846e-05	0.9136	1903
1:51109269	1:51693068	5.846e-05	0.9135	1903
1:51109269	1:51709837	5.844e-05	0.9163	1903
1:51109269	1:51710060	5.843e-05	0.9178	1903
1:51109269	1:51710306	5.842e-05	0.9189	1903
1:51109269	1:51719284	5.838e-05	0.9269	1903
1:51109269	1:50934276	5.834e-05	0.3335	1903
1:51109269	1:51709369	5.831e-05	0.9292	1903
1:51109269	1:51711933	5.829e-05	0.9322	1903
1:51109269	1:51709302	5.828e-05	0.9339	1903
1:51109269	1:51742714	5.827e-05	0.938	1903
1:51109269	1:51743876	5.827e-05	0.9375	1903
1:51109269	1:51743938	5.827e-05	0.9373	1903
1:51109269	1:51743019	5.827e-05	0.9378	1903
1:51109269	1:51742193	5.826e-05	0.9388	1903
1:51109269	1:51741634	5.826e-05	0.9395	1903
1:51109269	1:51741378	5.826e-05	0.9394	1903
1:51109269	1:51740141	5.825e-05	0.9404	1903
1:51109269	1:51719759	5.825e-05	0.9405	1903
1:51109269	1:51721129	5.825e-05	0.9404	1903
1:51109269	1:51740243	5.825e-05	0.9402	1903
1:51109269	1:51713726	5.825e-05	0.9408	1903
1:51109269	1:51739377	5.825e-05	0.9412	1903
1:51109269	1:51717031	5.825e-05	0.9408	1903
1:51109269	1:51739467	5.825e-05	0.9411	1903
1:51109269	1:51726660	5.824e-05	0.9436	1903
1:51109269	1:51727027	5.824e-05	0.9442	1903
1:51109269	1:51714429	5.824e-05	0.9441	1903
1:51109269	1:51733007	5.824e-05	0.9442	1903
1:51109269	1:51727423	5.824e-05	0.9441	1903
1:51109269	1:51725565	5.824e-05	0.9438	1903
1:51109269	1:51714270	5.824e-05	0.9437	1903
1:51109269	1:51733029	5.824e-05	0.9442	1903
1:51109269	1:51732139	5.824e-05	0.9434	1903
1:51109269	1:51728904	5.824e-05	0.9438	1903
1:51109269	1:51727213	5.824e-05	0.944	1903
1:51109269	1:51723016	5.824e-05	0.945	1903
1:51109269	1:51731662	5.824e-05	0.9445	1903
1:51109269	1:51723247	5.824e-05	0.945	1903
1:51109269	1:51723278	5.824e-05	0.945	1903
1:51109269	1:51723122	5.824e-05	0.9451	1903
1:51109269	1:51732323	5.824e-05	0.9445	1903
1:51109269	1:51731247	5.824e-05	0.9448	1903
1:51109269	1:51730639	5.824e-05	0.9445	1903
1:51109269	1:51723951	5.824e-05	0.9446	1903
1:51109269	1:51722494	5.824e-05	0.9451	1903
1:51109269	1:51722817	5.824e-05	0.945	1903
1:51109269	1:51729862	5.824e-05	0.9444	1903
1:51109269	1:51721429	5.823e-05	0.9454	1903
1:51109269	1:51721439	5.823e-05	0.9454	1903
1:51109269	1:51721619	5.823e-05	0.9455	1903
1:51109269	1:51688561	5.822e-05	0.9477	1903
1:51109269	1:51715289	5.822e-05	0.9479	1903
1:51109269	1:51717550	5.822e-05	0.9489	1903
1:51109269	1:51701946	5.821e-05	0.9095	1903
1:51109269	1:51715621	5.821e-05	0.9522	1903
1:51109269	1:51715722	5.82e-05	0.9526	1903
1:51109269	1:51689202	5.82e-05	0.9529	1903
1:51109269	1:51708526	5.818e-05	0.9586	1903
1:51109269	1:51708374	5.818e-05	0.9588	1903
1:51109269	1:51708568	5.818e-05	0.9587	1903
1:51109269	1:51708306	5.818e-05	0.9587	1903
1:51109269	1:51706654	5.818e-05	0.9596	1903
1:51109269	1:51706580	5.818e-05	0.9597	1903
1:51109269	1:51704561	5.818e-05	0.9609	1903
1:51109269	1:51692263	5.818e-05	0.9606	1903
1:51109269	1:51692477	5.818e-05	0.9608	1903
1:51109269	1:51704701	5.818e-05	0.9607	1903
1:51109269	1:51704424	5.818e-05	0.9608	1903
1:51109269	1:51708640	5.818e-05	0.9608	1903
1:51109269	1:51701678	5.817e-05	0.9618	1903
1:51109269	1:51690382	5.817e-05	0.9612	1903
1:51109269	1:51690488	5.817e-05	0.9612	1903
1:51109269	1:51689668	5.817e-05	0.9614	1903
1:51109269	1:51690168	5.817e-05	0.9612	1903
1:51109269	1:51690762	5.817e-05	0.9614	1903
1:51109269	1:51701307	5.817e-05	0.9625	1903
1:51109269	1:51700909	5.817e-05	0.9627	1903
1:51109269	1:51700636	5.817e-05	0.9628	1903
1:51109269	1:51699476	5.817e-05	0.9632	1903
1:51109269	1:51698754	5.817e-05	0.9635	1903
1:51109269	1:51698776	5.817e-05	0.9635	1903
1:51109269	1:51698333	5.817e-05	0.9637	1903
1:51109269	1:51694881	5.817e-05	0.9641	1903
1:51109269	1:51696792	5.817e-05	0.9647	1903
1:51109269	1:51698096	5.817e-05	0.9645	1903
1:51109269	1:51694118	5.817e-05	0.9646	1903
1:51109269	1:51693118	5.816e-05	0.965	1903
1:51109269	1:51695899	5.816e-05	0.9653	1903
1:51109269	1:51696300	5.816e-05	0.9649	1903
1:51109269	1:51722625	5.816e-05	0.9096	1903
1:51109269	1:50885585	5.814e-05	0.5187	1903
1:51109269	1:51718556	5.814e-05	0.9552	1903
1:51109269	1:51694544	5.81e-05	0.9688	1903
1:51109269	1:51693530	5.809e-05	0.974	1903
1:51109269	1:51703116	5.809e-05	0.1515	1903
1:51109269	1:51686023	5.809e-05	0.9766	1903
1:51109269	1:50900288	5.805e-05	0.4518	1903
1:51109269	1:51678697	5.801e-05	0.2323	1903
1:51109269	1:51698930	5.798e-05	0.9766	1903
1:51109269	1:51362212	5.796e-05	0.5772	1903
1:51109269	1:51741289	5.796e-05	0.9458	1903
1:51109269	1:51739208	5.781e-05	0.8982	1903
1:51109269	1:51302672	5.778e-05	0.5455	1903
1:51109269	1:51749060	5.74e-05	0.9668	1903
1:51109269	1:51743889	5.714e-05	0.8382	1903
1:51109269	1:51637247	5.709e-05	0.7142	1903
1:51109269	1:51168686	5.697e-05	0.07223	1903
1:51109269	1:51204943	5.693e-05	0.9051	1903
1:51109269	1:50850677	5.684e-05	0.07048	1903
1:51109269	1:50844173	5.684e-05	0.06948	1903
1:51109269	1:50843504	5.666e-05	0.3838	1903
1:51109269	1:51527228	5.662e-05	0.6465	1903
1:51109269	1:51712648	5.622e-05	0.2423	1903
1:51109269	1:51324275	5.62e-05	0.5483	1903
1:51109269	1:51410595	5.62e-05	0.5477	1903
1:51109269	1:51741709	5.606e-05	0.1247	1903
1:51109269	1:51394252	5.603e-05	0.5514	1903
1:51109269	1:51303315	5.595e-05	0.5537	1903
1:51109269	1:51427203	5.593e-05	0.9936	1903
1:51109269	1:51300512	5.581e-05	0.8616	1903
1:51109269	1:51572465	5.563e-05	0.1618	1903
1:51109269	1:51185559	5.532e-05	0.5721	1903
1:51109269	1:51666216	5.524e-05	0.2116	1903
1:51109269	1:51056211	5.509e-05	0.7435	1903
1:51109269	1:51505137	5.5e-05	0.9105	1903
1:51109269	1:51175764	5.493e-05	0.5807	1903
1:51109269	1:51017980	5.477e-05	0.7659	1903
1:51109269	1:51604367	5.473e-05	0.9703	1903
1:51109269	1:51704527	5.439e-05	0.522	1903
1:51109269	1:51736472	5.437e-05	0.2536	1903
1:51109269	1:51418048	5.437e-05	0.9439	1903
1:51109269	1:50952011	5.41e-05	0.6767	1903
1:51109269	1:50956107	5.405e-05	0.8737	1903
1:51109269	1:50832776	5.39e-05	0.4557	1903
1:51109269	1:51671399	5.385e-05	0.7528	1903
1:51109269	1:51743870	5.381e-05	0.2583	1903
1:51109269	1:51636610	5.38e-05	0.7313	1903
1:51109269	1:51574542	5.371e-05	0.4825	1903
1:51109269	1:50840015	5.367e-05	0.076	1903
1:51109269	1:51028595	5.357e-05	0.6056	1903
1:51109269	1:51724712	5.351e-05	0.5305	1903
1:51109269	1:51648437	5.349e-05	0.6251	1903
1:51109269	1:50891015	5.344e-05	0.5494	1903
1:51109269	1:51773275	5.302e-05	0.5572	1903
1:51109269	1:51690086	5.264e-05	0.7177	1903
1:51109269	1:51580037	5.262e-05	0.4955	1903
1:51109269	1:50842123	5.247e-05	0.07742	1903
1:51109269	1:50957509	5.237e-05	0.1039	1903
1:51109269	1:51671303	5.226e-05	0.1417	1903
1:51109269	1:50979101	5.207e-05	0.936	1903
1:51109269	1:51314694	5.199e-05	0.8284	1903
1:51109269	1:50889476	5.199e-05	0.6139	1903
1:51109269	1:51644015	5.178e-05	0.2406	1903
1:51109269	1:50843153	5.177e-05	0.07809	1903
1:51109269	1:51149475	5.171e-05	0.6994	1903
1:51109269	1:51033362	5.144e-05	0.4321	1903
1:51109269	1:50963326	5.131e-05	0.5945	1903
1:51109269	1:50960752	5.131e-05	0.6007	1903
1:51109269	1:50848204	5.12e-05	0.07946	1903
1:51109269	1:50837939	5.12e-05	0.07947	1903
1:51109269	1:51088149	5.118e-05	0.4367	1903
1:51109269	1:51013003	5.095e-05	0.4412	1903
1:51109269	1:51688209	5.092e-05	0.09897	1903
1:51109269	1:51217558	5.054e-05	0.1681	1903
1:51109269	1:50884778	5.045e-05	0.1444	1903
1:51109269	1:51578488	5.035e-05	0.5248	1903
1:51109269	1:50818474	4.999e-05	0.9655	1903
1:51109269	1:50923475	4.989e-05	0.5321	1903
1:51109269	1:51173771	4.965e-05	0.9597	1903
1:51109269	1:51384817	4.948e-05	0.8559	1903
1:51109269	1:50831385	4.944e-05	0.08471	1903
1:51109269	1:51646235	4.94e-05	0.8578	1903
1:51109269	1:50830214	4.936e-05	0.08393	1903
1:51109269	1:51028355	4.919e-05	0.9871	1903
1:51109269	1:50984561	4.904e-05	0.6772	1903
1:51109269	1:50814474	4.871e-05	0.3127	1903
1:51109269	1:50936801	4.867e-05	0.6737	1903
1:51109269	1:51673103	4.863e-05	0.2748	1903
1:51109269	1:51521071	4.851e-05	0.9666	1903
1:51109269	1:51716714	4.841e-05	0.1511	1903
1:51109269	1:50879413	4.841e-05	0.3571	1903
1:51109269	1:50937092	4.84e-05	0.6872	1903
1:51109269	1:51747440	4.838e-05	0.2944	1903
1:51109269	1:51671594	4.824e-05	0.279	1903
1:51109269	1:51679788	4.82e-05	0.6372	1903
1:51109269	1:51538512	4.819e-05	0.771	1903
1:51109269	1:51559452	4.815e-05	0.8776	1903
1:51109269	1:51726939	4.814e-05	0.1528	1903
1:51109269	1:51727613	4.814e-05	0.1523	1903
1:51109269	1:51599565	4.812e-05	0.5659	1903
1:51109269	1:51712092	4.812e-05	0.2789	1903
1:51109269	1:50861886	4.763e-05	0.08165	1903
1:51109269	1:51708696	4.76e-05	0.1548	1903
1:51109269	1:51720774	4.76e-05	0.1544	1903
1:51109269	1:51601816	4.749e-05	0.8044	1903
1:51109269	1:51571893	4.743e-05	0.1297	1903
1:51109269	1:50834471	4.742e-05	0.08841	1903
1:51109269	1:51719128	4.737e-05	0.548	1903
1:51109269	1:51343774	4.735e-05	0.5142	1903
1:51109269	1:51707171	4.733e-05	0.1561	1903
1:51109269	1:51740644	4.733e-05	0.1566	1903
1:51109269	1:51463790	4.731e-05	0.9721	1903
1:51109269	1:50821587	4.728e-05	0.5683	1903
1:51109269	1:50983465	4.675e-05	0.7562	1903
1:51109269	1:51700278	4.673e-05	0.1592	1903
1:51109269	1:51700439	4.673e-05	0.1589	1903
1:51109269	1:50834189	4.67e-05	0.3878	1903
1:51109269	1:51730867	4.67e-05	0.7239	1903
1:51109269	1:51238893	4.667e-05	0.1879	1903
1:51109269	1:51361431	4.667e-05	0.529	1903
1:51109269	1:51121198	4.667e-05	0.1073	1903
1:51109269	1:51709522	4.662e-05	0.1599	1903
1:51109269	1:50916909	4.657e-05	0.7115	1903
1:51109269	1:51703323	4.655e-05	0.1592	1903
1:51109269	1:51723768	4.655e-05	0.1591	1903
1:51109269	1:51745574	4.651e-05	0.5698	1903
1:51109269	1:51701461	4.647e-05	0.1607	1903
1:51109269	1:51021438	4.596e-05	0.689	1903
1:51109269	1:51019137	4.594e-05	0.6894	1903
1:51109269	1:51683539	4.567e-05	0.7489	1903
1:51109269	1:51356268	4.564e-05	0.2963	1903
1:51109269	1:51528696	4.556e-05	0.6952	1903
1:51109269	1:51644048	4.552e-05	0.9173	1903
1:51109269	1:51249713	4.524e-05	0.5502	1903
1:51109269	1:51040826	4.523e-05	0.1184	1903
1:51109269	1:51459479	4.511e-05	0.5543	1903
1:51109269	1:51379485	4.497e-05	0.8583	1903
1:51109269	1:51345843	4.495e-05	0.8666	1903
1:51109269	1:51327045	4.468e-05	0.9153	1903
1:51109269	1:51693430	4.468e-05	0.7875	1903
1:51109269	1:51661974	4.438e-05	0.1693	1903
1:51109269	1:51457815	4.433e-05	0.5743	1903
1:51109269	1:51078223	4.432e-05	0.3269	1903
1:51109269	1:51170948	4.429e-05	0.4837	1903
1:51109269	1:51272907	4.418e-05	0.7072	1903
1:51109269	1:51733936	4.413e-05	0.8366	1903
1:51109269	1:51729989	4.404e-05	0.1437	1903
1:51109269	1:50916964	4.404e-05	0.3406	1903
1:51109269	1:51670916	4.398e-05	0.171	1903
1:51109269	1:51467582	4.382e-05	0.4474	1903
1:51109269	1:50809304	4.381e-05	0.481	1903
1:51109269	1:51593147	4.38e-05	0.9729	1903
[truncated: 25,494 more rows]

[truncated: 3 more sheets: ST11, ST12, ST13]
